# Supplementary material for: Patterns in evolutionary origins of heme, chlorophyll a and isopentenyl diphosphate biosynthetic pathways suggest non-photosynthetic periods prior to plastid replacements in dinoflagellates
Source: PeerJ journal article supplement (doi:10.7717/peerj.5345), 2018-08-03
Supplement: Matsuo_FigS2_chla.pdf [file Matsuo_FigS2_chla.pdf]

# MgCH(ChID)

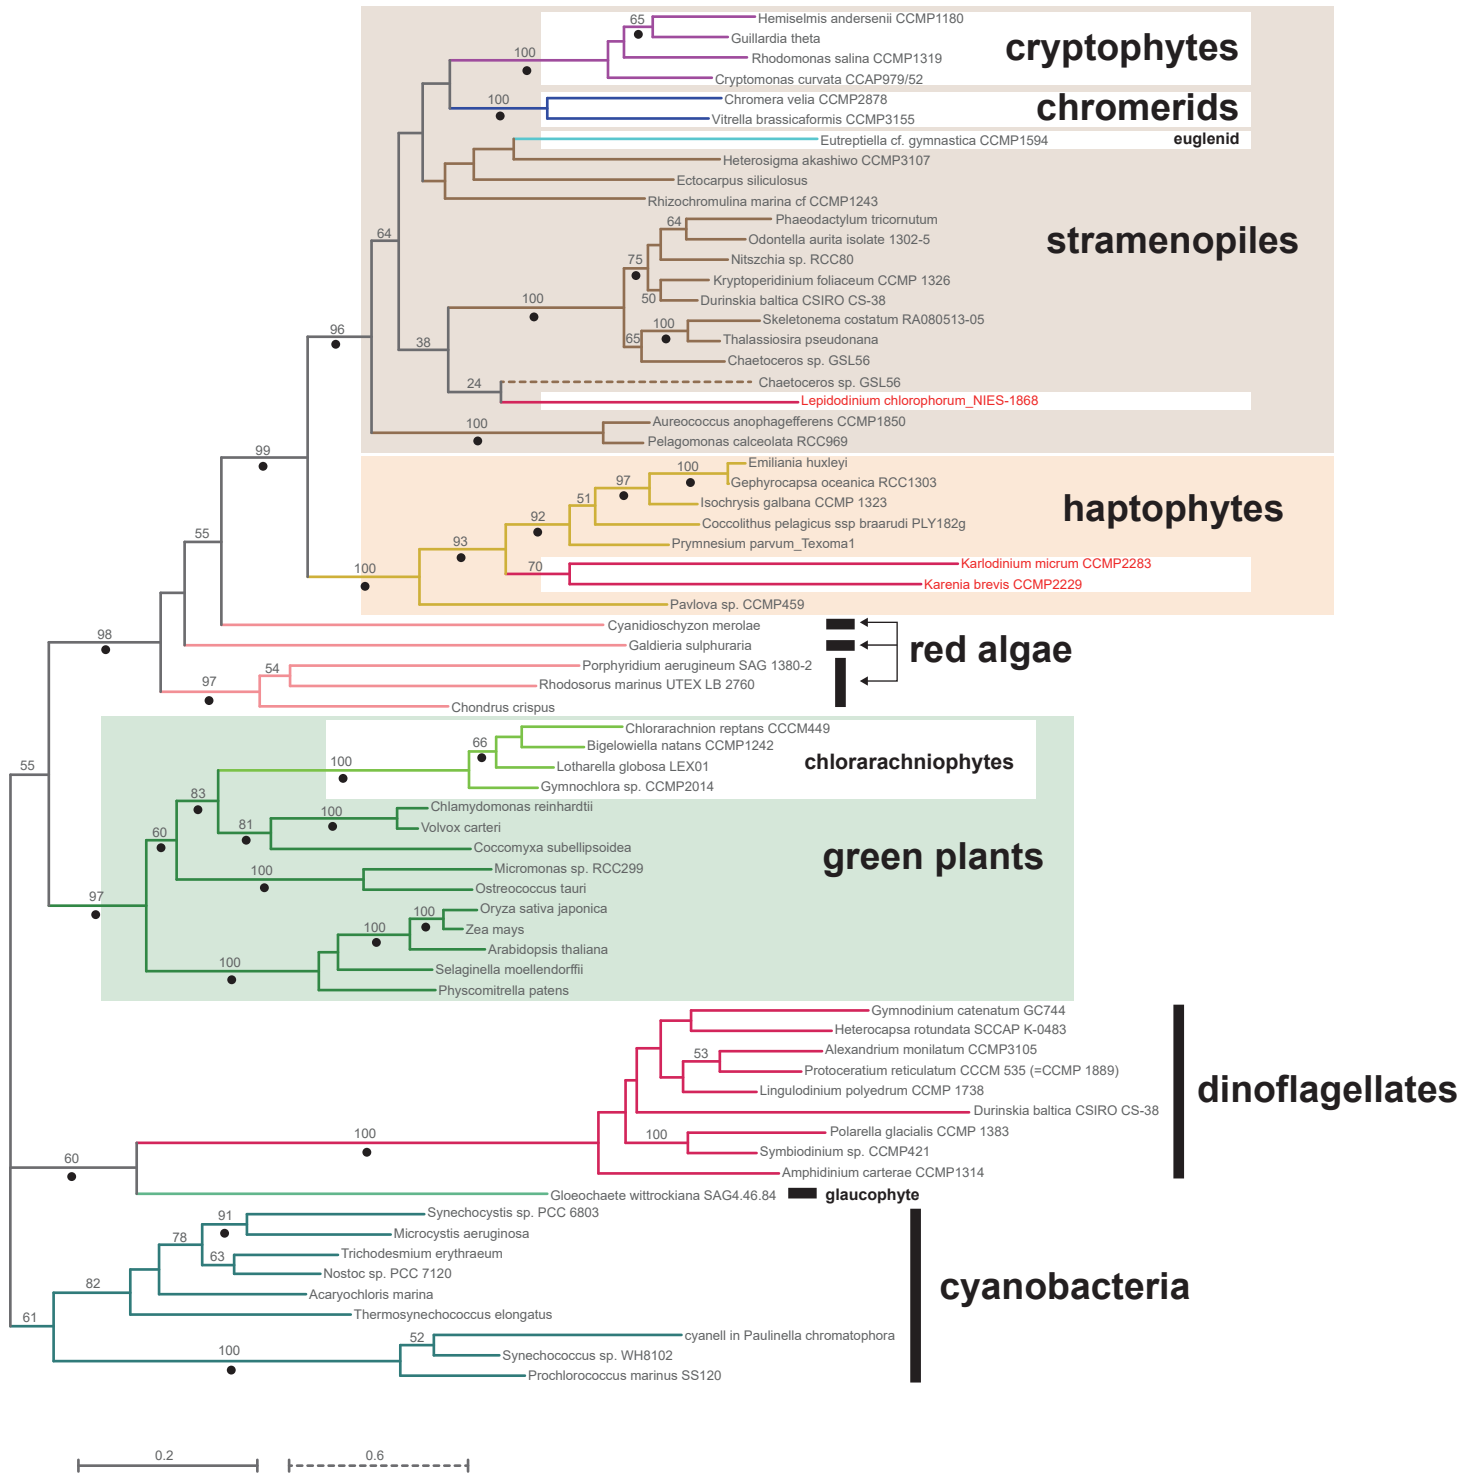

# MgCH(ChlH)

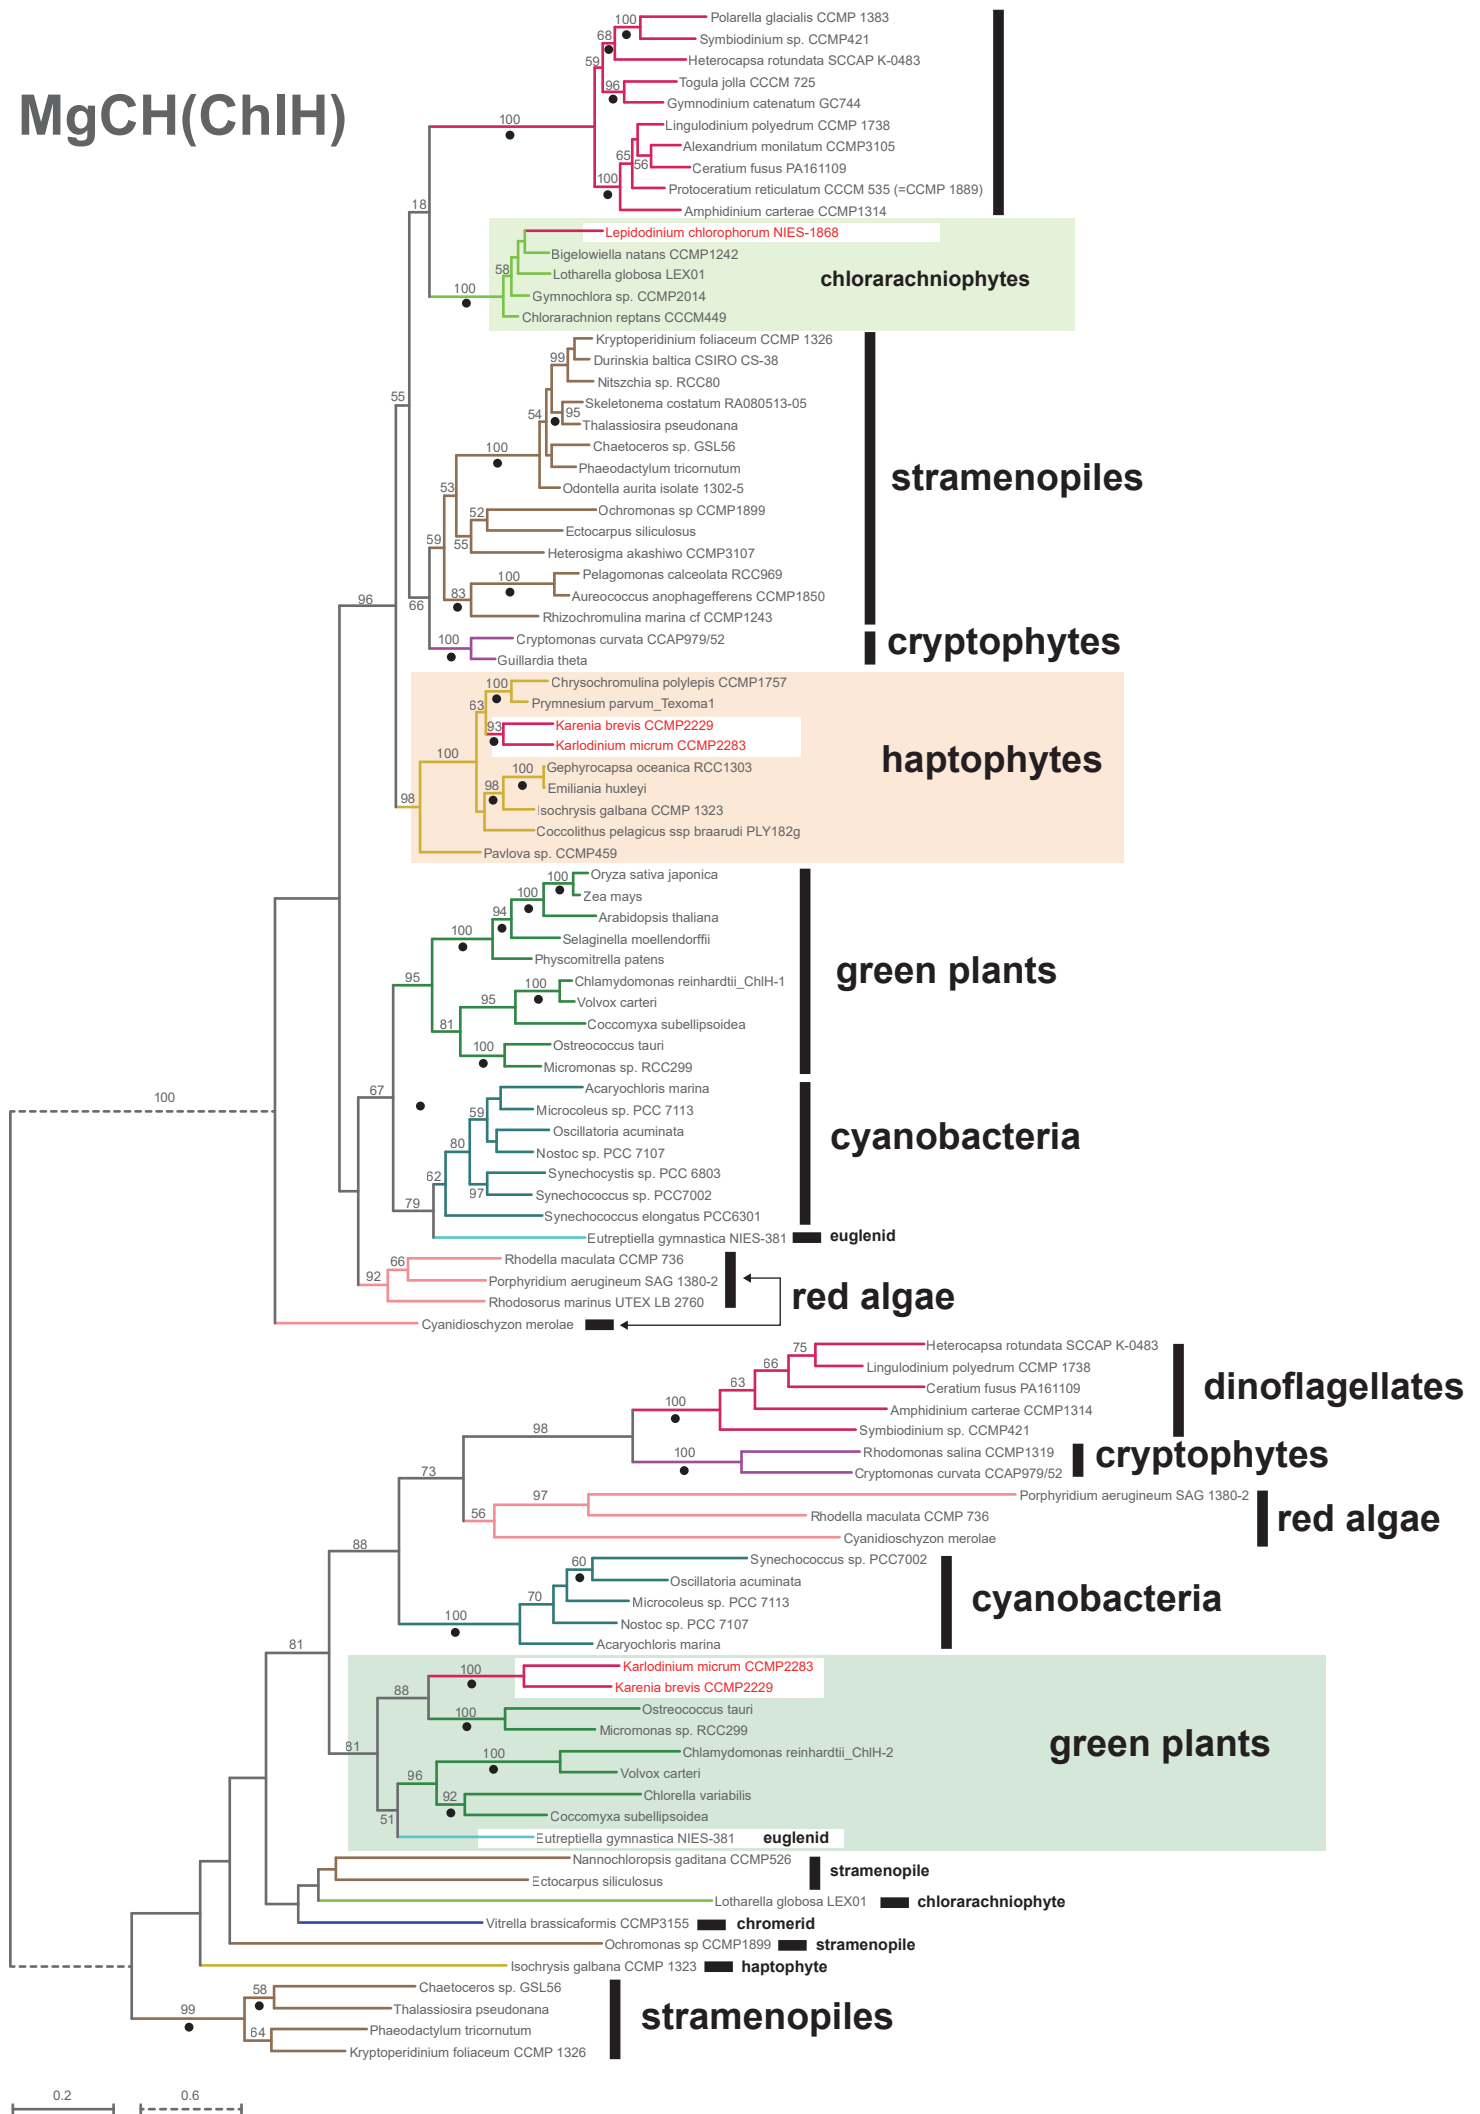

0.2 0.6

# MgPMT

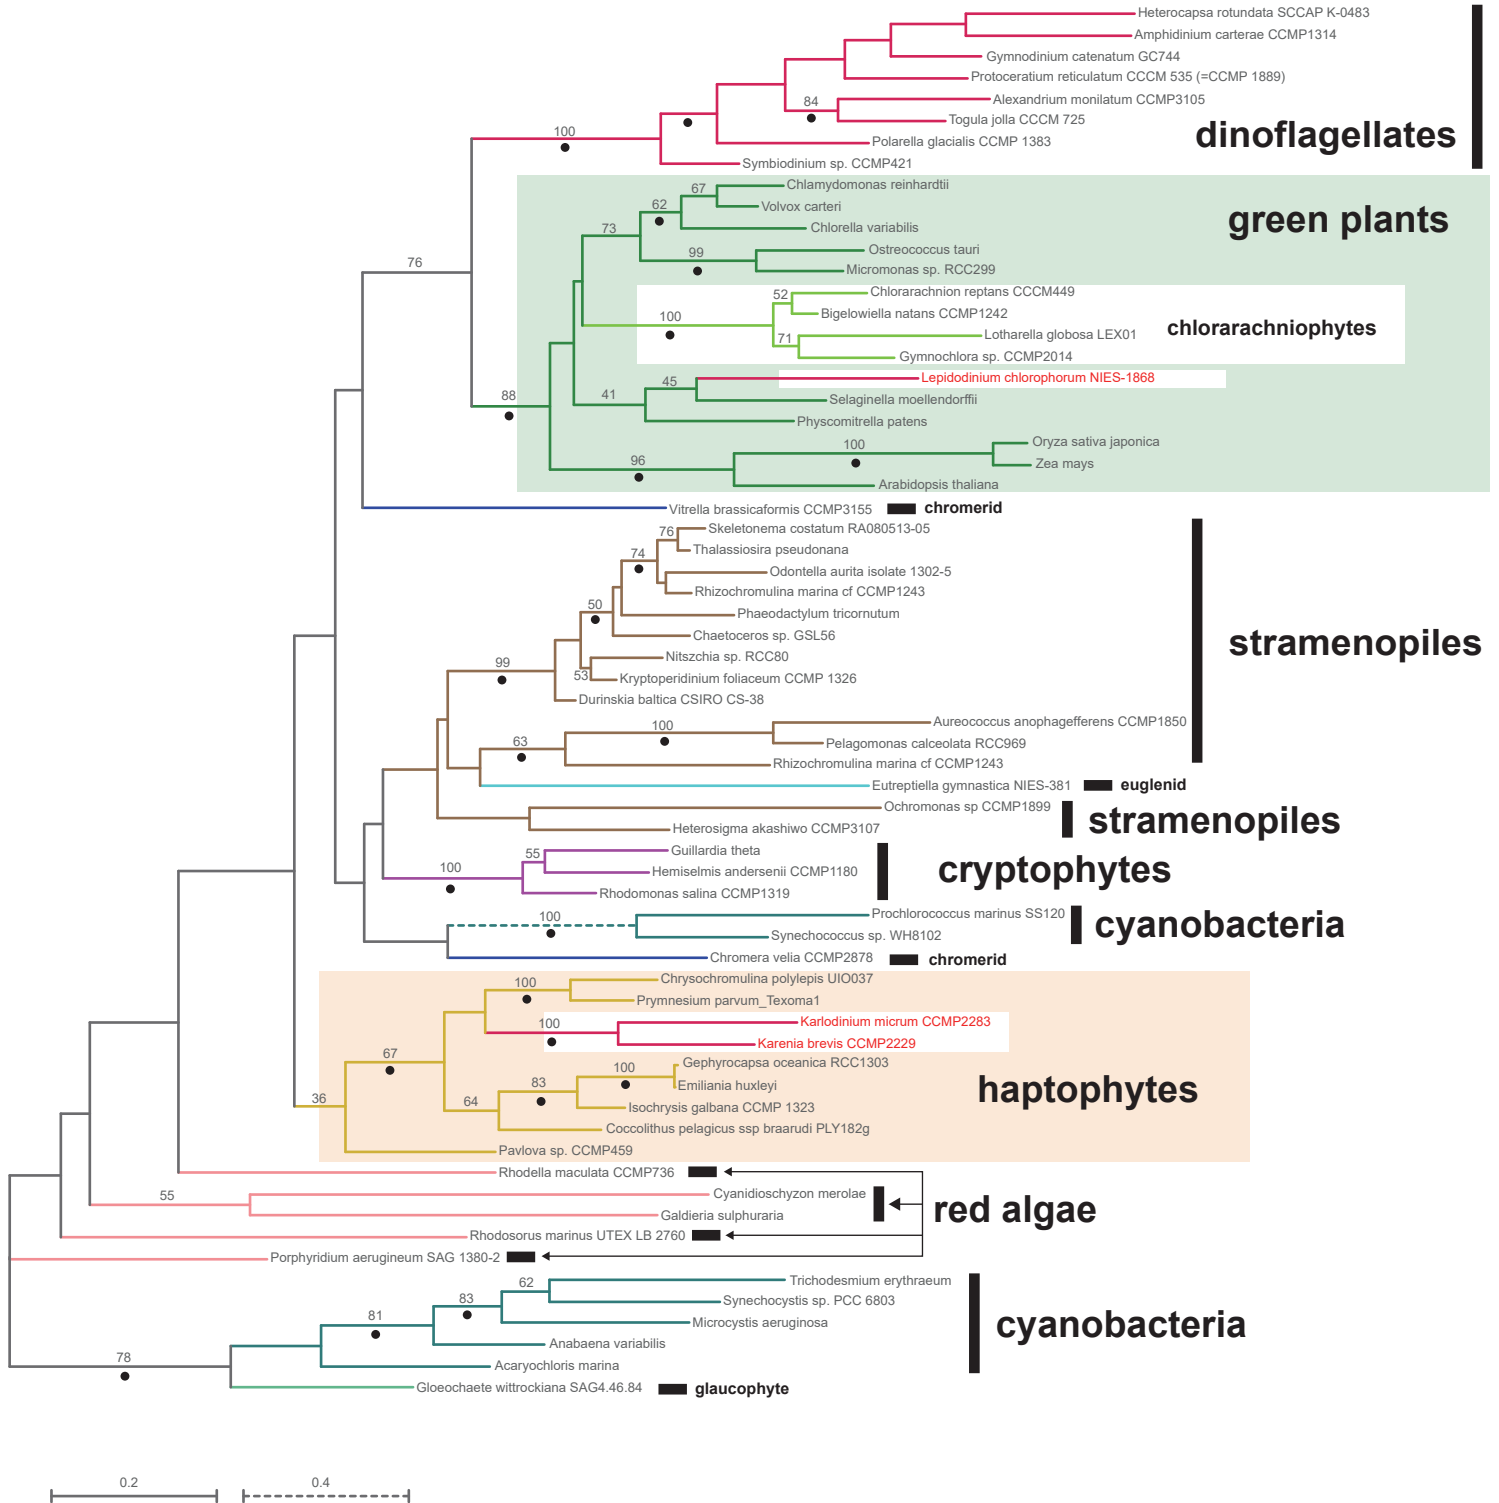

# F-DVR

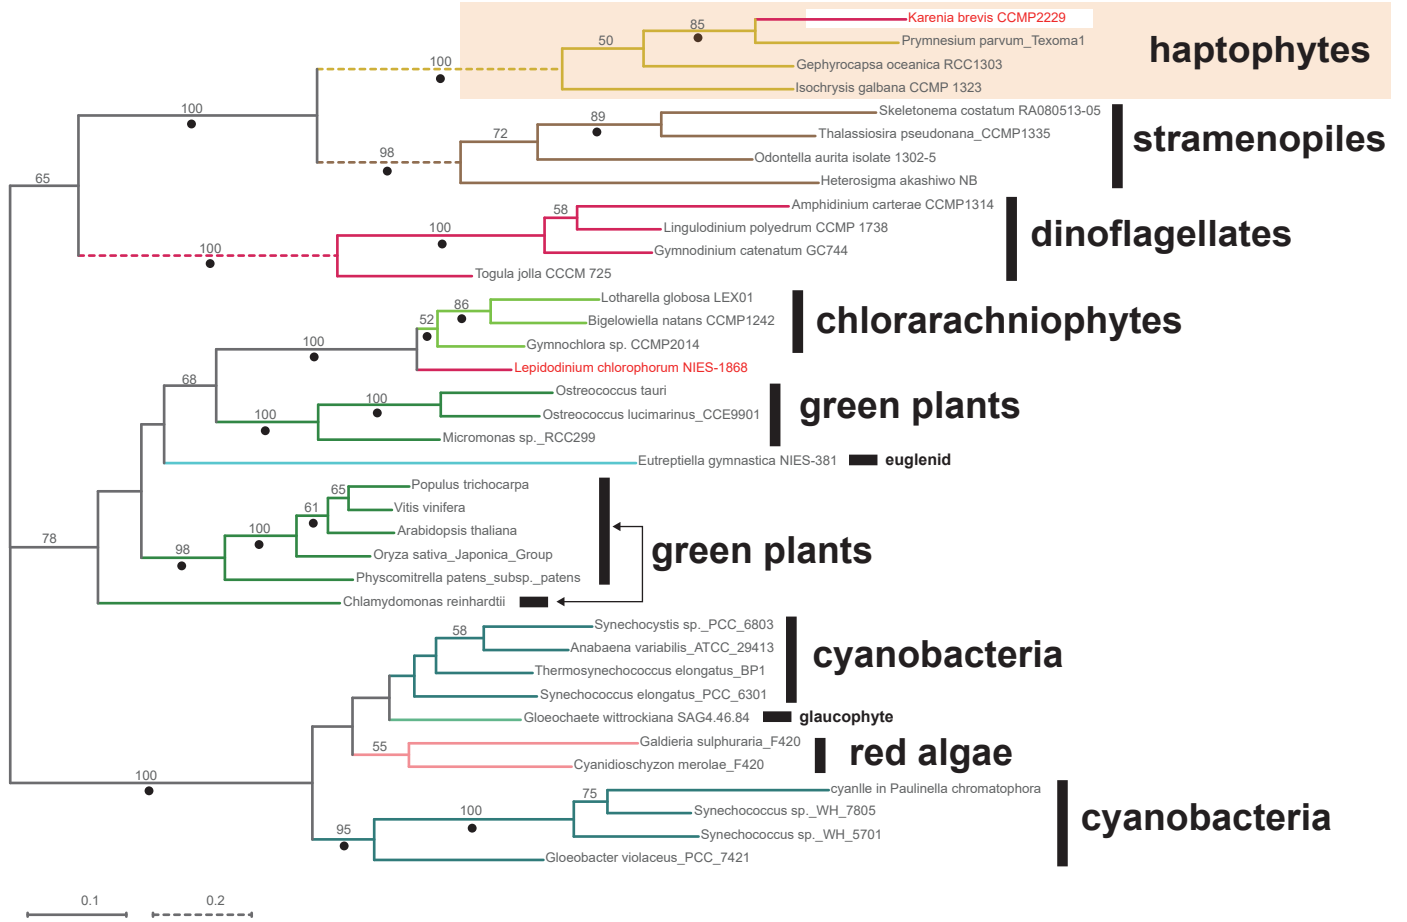

# N-DVR

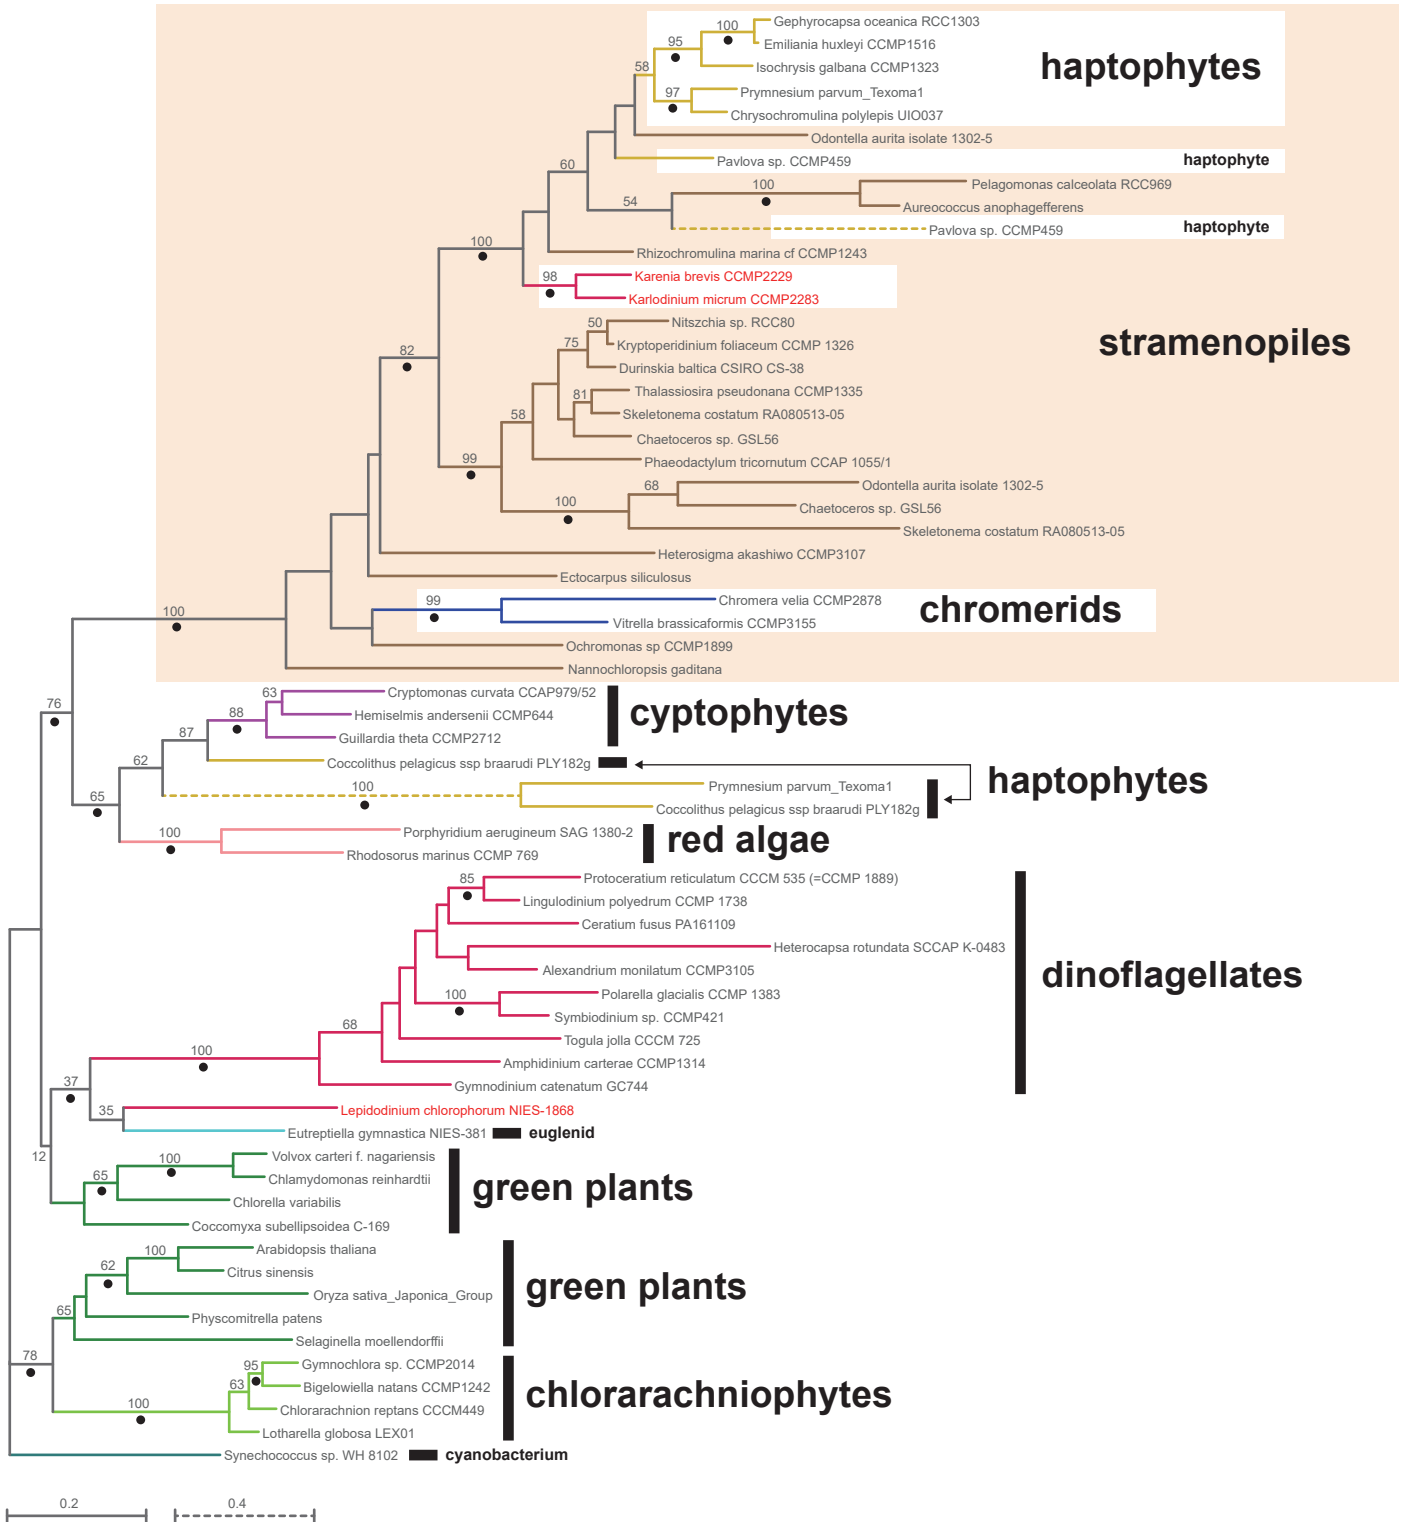

# POR (light-dependent)

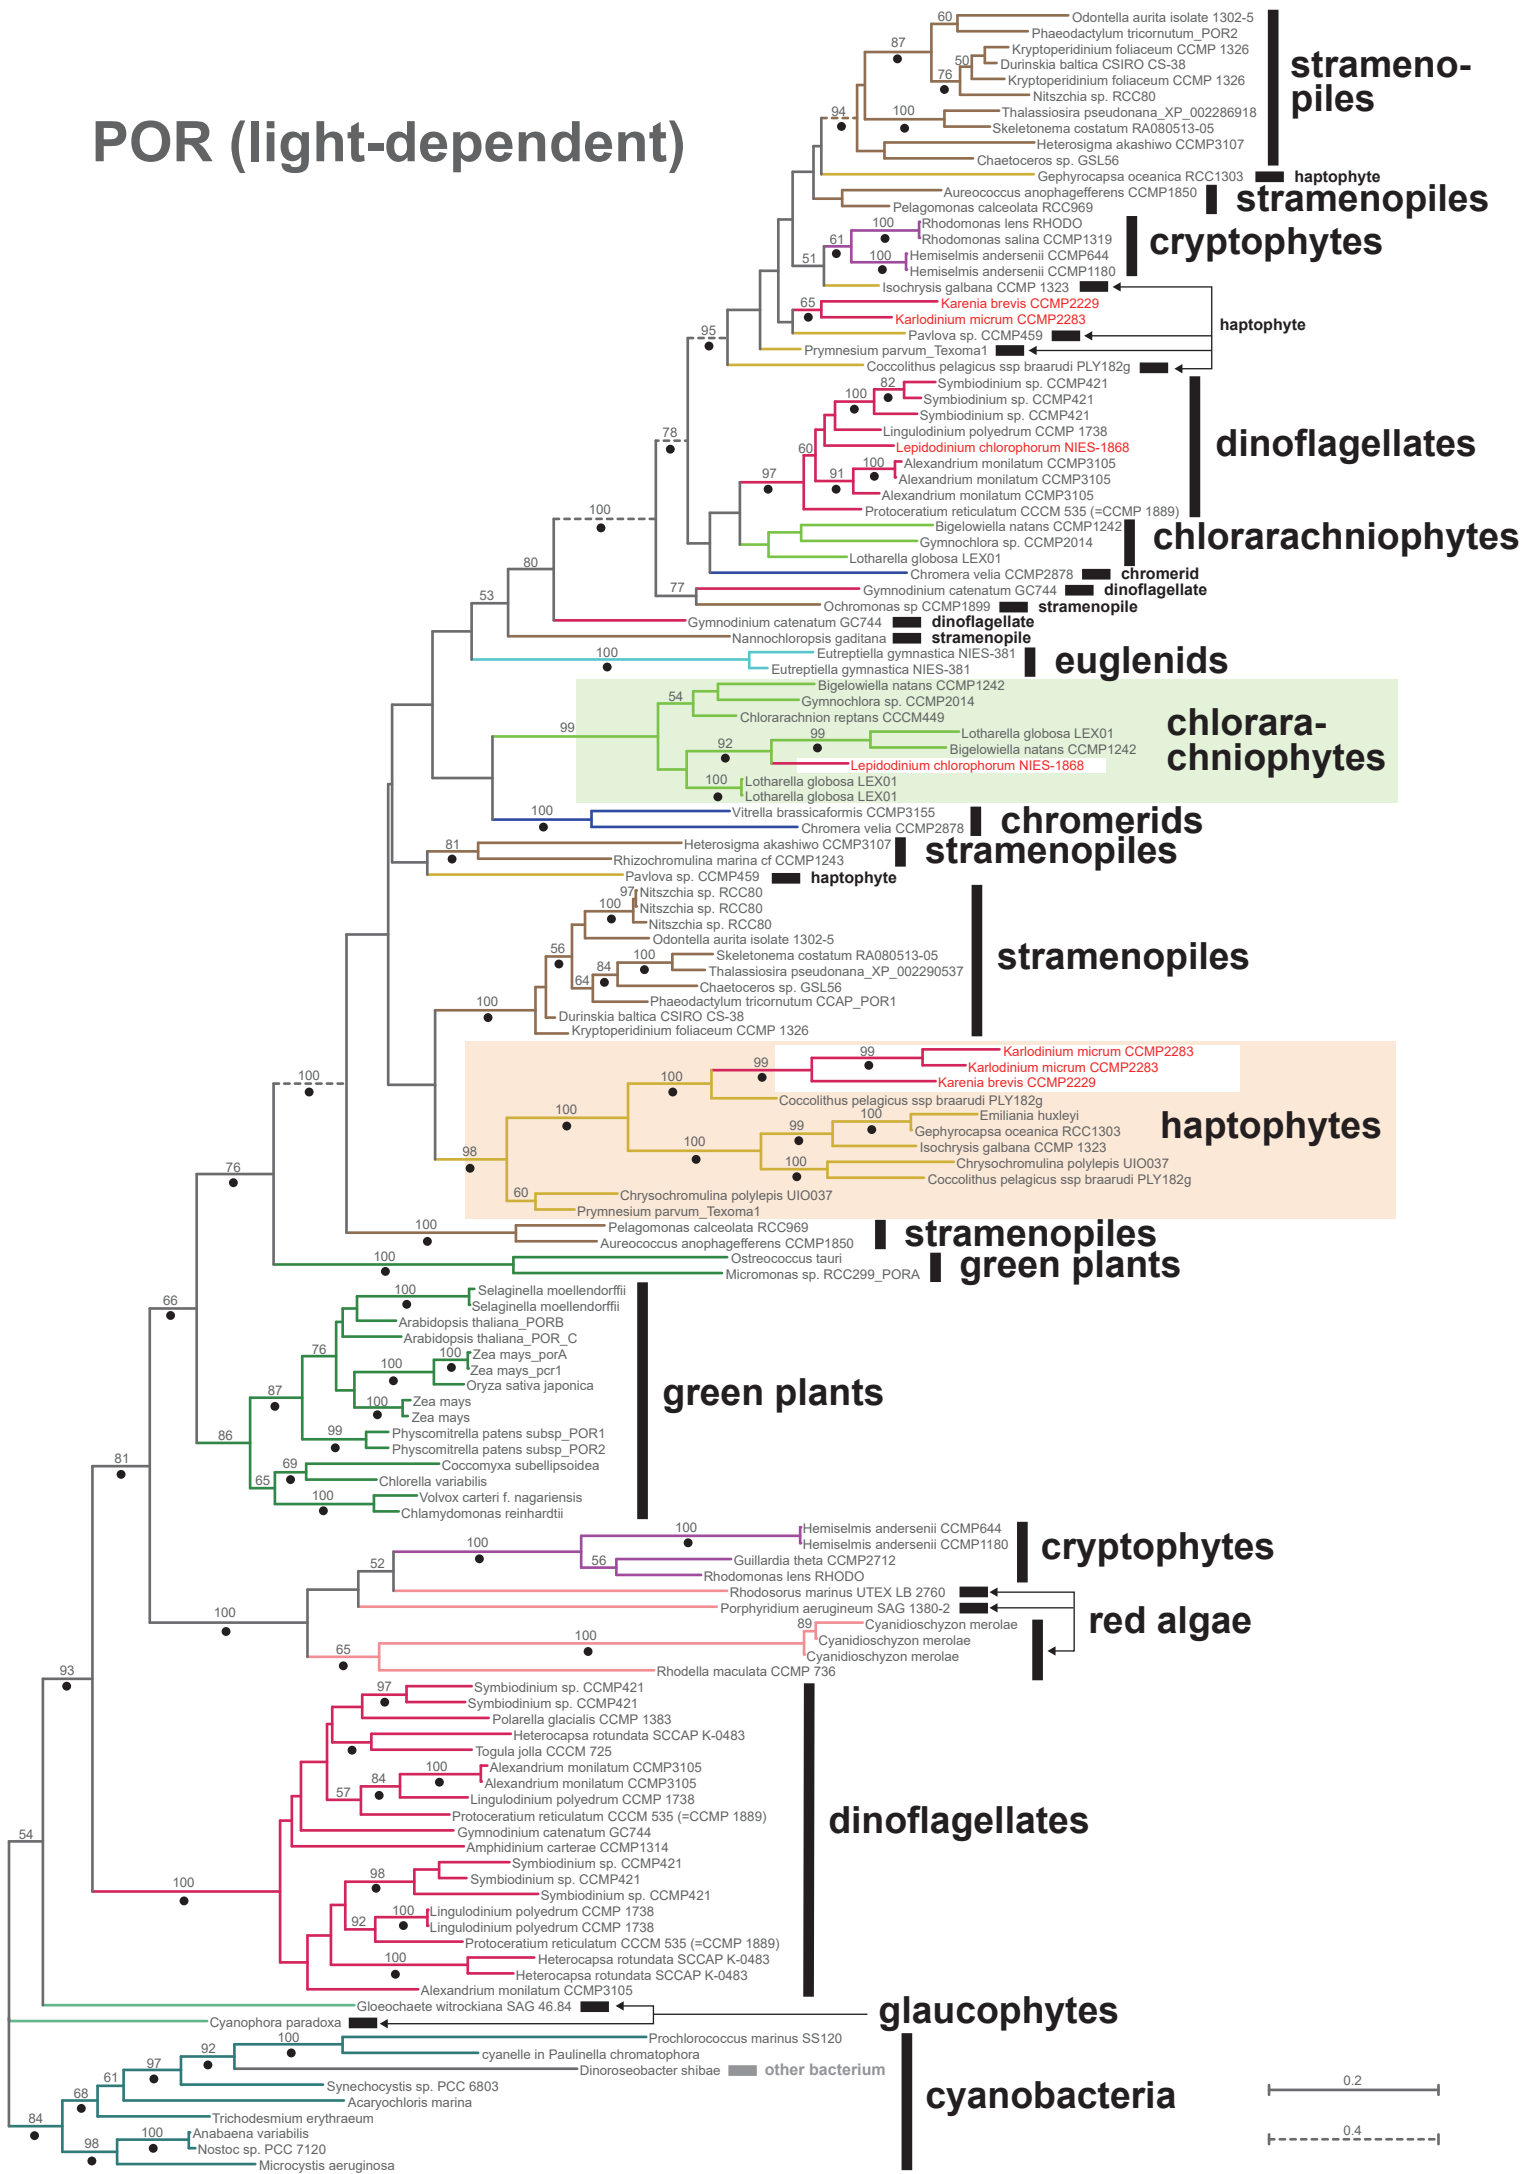

CS

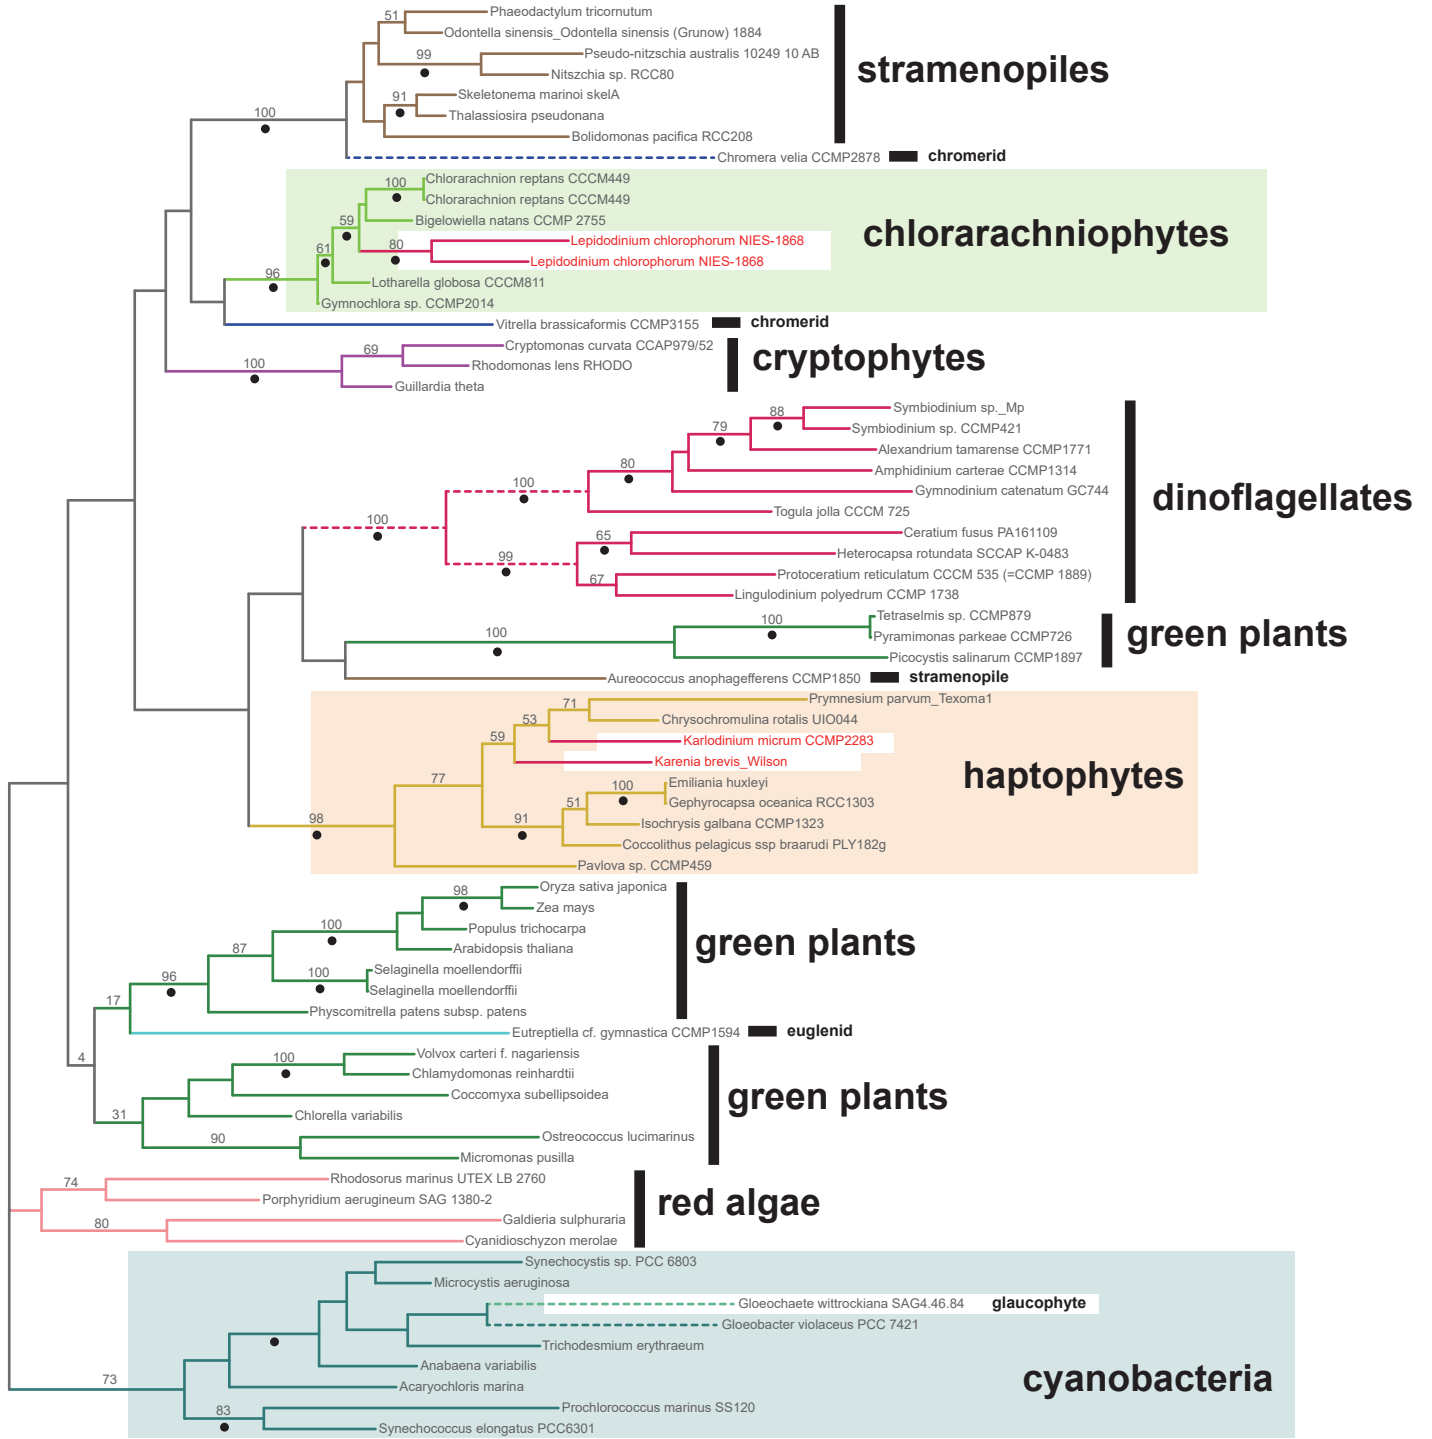

0.1 0.2
