# Supplementary material for: Patterns in evolutionary origins of heme, chlorophyll a and isopentenyl diphosphate biosynthetic pathways suggest non-photosynthetic periods prior to plastid replacements in dinoflagellates
Source: PeerJ. 2018 Aug 3;6:e5345. doi: 10.7717/peerj.5345 (PMC6078071; doi:10.7717/peerj.5345)
Supplement: Supplemental Information 4 [file peerj-06-5345-s004.xlsx]

## Sheet: IPP
All accession numbers listed beolw are for the KEGG Pathway.
Group	Species	DXS	DXR	IspD	IspE	IspF	IspG	IspH
green plants	Arabidopsis thaliana	AT3G21500; AT4G15560; AT5G11380	AT5G62790	AT2G02500	AT2G26930	AT1G63970	AT5G60600	AT4G34350
	Chlamydomonas reinhardtii	CHLREDRAFT_196568	CHLREDRAFT_196606	CHLREDRAFT_196604	CHLREDRAFT_137673	CHLREDRAFT_188593	CHLREDRAFT_55268	CHLREDRAFT_59822
	Chlorella variabilis	CHLNCDRAFT_59788		CHLNCDRAFT_141910		CHLNCDRAFT_53457	CHLNCDRAFT_144676	CHLNCDRAFT_59658
	Coccomyxa subellipsoidea				COCSUDRAFT_35952
	Micromonas sp. RCC299	MICPUN_107366	MICPUN_108708	MICPUN_83560	MICPUN_109549	MICPUN_113519	MICPUN_95921	MICPUN_97588
	Oryza sativa japonica	4338768; 4340090; 4342614				4330320	4329911	4334003; 4334004
	Ostreococcus tauri	Ot02g03880	Ot04g03460			Ot11g00050	Ot09g00990	Ot08g01140
	Ostreococcus lucimarinus			OSTLU_24843	OSTLU_4287
	Physcomitrella patens subsp. patens	PHYPADRAFT_105028; PHYPADRAFT_137710; PHYPADRAFT_175220; PHYPADRAFT_73475	PHYPADRAFT_127023; PHYPADRAFT_128953	PHYPADRAFT_144079; PHYPADRAFT_213502	PHYPADRAFT_190580	PHYPADRAFT_150209	PHYPADRAFT_130936; PHYPADRAFT_233105; PHYPADRAFT_55802	PHYPADRAFT_194018; PHYPADRAFT_206243
	Selaginella moellendorffii	SELMODRAFT_143534; SELMODRAFT_268187; SELMODRAFT_268893; SELMODRAFT_427859	SELMODRAFT_229487; SELMODRAFT_229643	SELMODRAFT_117940; SELMODRAFT_68366; SELMODRAFT_73567	SELMODRAFT_180163; SELMODRAFT_428849; SELMODRAFT_74466	SELMODRAFT_130637; SELMODRAFT_90975	SELMODRAFT_149035; SELMODRAFT_158184	SELMODRAFT_163924; SELMODRAFT_270627; SELMODRAFT_408398
	Volvox carteri f. nagariensis	VOLCADRAFT_107482	VOLCADRAFT_82431	VOLCADRAFT_84386		VOLCADRAFT_88137	VOLCADRAFT_63610	VOLCADRAFT_79586
red algae	Chondrus crispus	CHC_T00001454001; CHC_T00001589001; CHC_T00001730001; CHC_T00003375001; CHC_T00003376001; CHC_T00003401001; CHC_T00003402001; CHC_T00008758001; CHC_T00009061001	CHC_T00009191001		CHC_T00003708001	CHC_T00009483001	CHC_T00003814001	CHC_T00008841001
	Cyanidioschyzon merolae	CYME_CMF089C	CYME_CMG148C	CYME_CMH115C	CYME_CMS444C	CYME_CMT435C	CYME_CML284C	CYME_CMJ152C
	Galdieria sulphuraria	Gasu_42090	Gasu_57430	Gasu_37730	Gasu_28410	Gasu_00190	Gasu_27800	Gasu_18090
apicomplexa	Babesia bovis				BBOV_II007070
	Babesia equi		BEWA_017980
	Plasmodium berghei			PB001389.02.0; PB300422.00.0
	Plasmodium falciparum 3D7	MAL13P1.186	PF14_0641		PFE0150c	PFB0420w	PF10_0221	PFA_0225w
	Theileria annulata					TA04155	TA14455
	Theileria orientalis		TOT_020001022	TOT_030000808
	Theileria parva					TP03_0365		TP03_0674
	Toxoplasma gondii	TGME49_008820	TGME49_014850			TGME49_055690	TGME49_062430	TGME49_027420
stramenopiles	Nannochloropsis gaditana	NGA_0220301			NGA_0458410	NGA_0265102
	Phaeodactylum tricornutum	PHATRDRAFT_bd1689	PHATRDRAFT_43204	PHATRDRAFT_21829	PHATRDRAFT_51700	PHATRDRAFT_56610	PHATRDRAFT_44955	PHATRDRAFT_50808
	Thalassiosira pseudonana	THAPS_270312	THAPS_10943	THAPSDRAFT_3622	THAPSDRAFT_31907	THAPSDRAFT_10102	THAPSDRAFT_29228	THAPSDRAFT_270376
haptophytes	Emiliania huxleyi	EMIHUDRAFT_440786; EMIHUDRAFT_451841	EMIHUDRAFT_68547	EMIHUDRAFT_443903	EMIHUDRAFT_461009	EMIHUDRAFT_122012; EMIHUDRAFT_196709	EMIHUDRAFT_118009; EMIHUDRAFT_442353; EMIHUDRAFT_447290	EMIHUDRAFT_112566; EMIHUDRAFT_632075
cryptophytes	Guillardia theta	GUITHDRAFT_84075	GUITHDRAFT_97309	GUITHDRAFT_147863		GUITHDRAFT_154316	GUITHDRAFT_63981	GUITHDRAFT_162757
cyanobacteria	Acaryochloris marina	AM1_5186	AM1_0563	AM1_3984		AM1_2915	AM1_0149	AM1_4950
	Microcystis aeruginosa	MAE_62650		MAE_45830		MAE_31930	MAE_28180	MAE_16190
	Nostoc sp. PCC 7120	alr0599	alr4351	all5167	alr3230	alr3883	all2501	all0985
	Oscillatoria acuminata				Oscil6304_3757	Oscil6304_4910	Oscil6304_2940
	Prochlorococcus marinus SS120		Pro_1236	Pro_0453	Pro_0764		Pro_1015	Pro_0296
	Prochlorococcus marinus MIT 9303		P9303_08651
	Synechococcus sp. WH8102	SYNW1292	SYNW0698	SYNW1849	SYNW1053	SYNW1610	SYNW1174	SYNW0252
	Synechocystis sp. PCC 6803	sll1945	sll0019	slr0951	sll0711	slr1542	slr2136	slr0348
	Thermosynechococcus elongatus	tll0623				tlr2035	tlr0996	tlr1041
	Thermosynechococcus sp. NK55	NK55_01580
	Trichodesmium erythraeum	Tery_3042	Tery_0416	Tery_0609	Tery_4700	Tery_4716		Tery_4479
	Trichormus variabilis	Ava_4532	Ava_1300	Ava_2414	Ava_4887	Ava_1811	Ava_0433	Ava_2949
other bacteria	Agrobacterium fabrum			Atu1443
	Anaplasma marginale				AM493
	Chroococcidiopsis thermalis		Chro_4712
	Dactylococcopsis salina				Dacsa_1455
	Escherichia coli K-12 MG1655	b0420				b2746	b2515	b0029
	Helicobacter pylori 26695				HP1443
	Leptolyngbya sp. PCC 7376				Lepto7376_0912
	Leptospira biflexa			LEPBI_I1435
	Phaeobacter inhibens	PGA1_c34170	PGA1_c14250
	Pseudoalteromonas haloplanktis				PSHAa1055
	Rhodobacter sphaeroides					RSP_6071		RSP_1666
	Rhodospirillum rubrum ATCC 11170	Rru_A0054; Rru_A2619	Rru_A1592	Rru_A1674	Rru_A0263
	Xanthomonas campestris pv. campestris ATCC 33913				XCC0871
	Yersinia pestis CO92					YPO3360	YPO2879	YPO0477
	Yersinia pestis KIM10+				y2293
	Yersinia pseudotuberculosis IP32953			YPTB0770
	Yersinia pseudotuberculosis MD67	BZ21_184	BZ21_2312

## Sheet: Chla
Accession numbers shaded in grey are for the KEGG Pathway, and those shaded in yellow are for NCBI database.
Group	Species	MgCH(D)	MgCH(I)	MgCH(H)	MgPMT	MgPME cyclase	N-DVR	F-DVR	POR	Light-independent POR(B)	Light-independent POR(L)	Light-independent POR(N)	CS
green plants	Adiantum capillus-veneris									NP_848041	NP_848120	NP_848119
	Anthoceros angustus									NP_777402
	Arabidopsis thaliana	AT1G08520	AT4G18480; AT5G45930	AT5G13630	AT4G25080	AT3G56940	NP_197367	NP_171956	AT1G03630; AT4G27440; AT5G54190				AT3G51820
	Chaetosphaeridium globosum									NP_683785	NP_683846	NP_683847
	Chara vulgaris									YP_635732	YP_635807	YP_635806
	Chlamydomonas reinhardtii	CHLREDRAFT_134594		CHLREDRAFT_105632; CHLREDRAFT_195524	CHLREDRAFT_195575	CHLREDRAFT_183476; CHLREDRAFT_205856		XP_001699546	CHLREDRAFT_136589	NP_958360	ChreCp009	ChreCp056	CHLREDRAFT_5437
	Chlorella variabilis	CHLNCDRAFT_57315		CHLNCDRAFT_25038	CHLNCDRAFT_27668	CHLNCDRAFT_144710; CHLNCDRAFT_48731			CHLNCDRAFT_139763				CHLNCDRAFT_34863
	Coccomyxa subellipsoidea	COCSUDRAFT_54337	CospP_p079	COCSUDRAFT_12706; COCSUDRAFT_62355	COCSUDRAFT_20752	COCSUDRAFT_35563			COCSUDRAFT_65591	YP_004221986			COCSUDRAFT_27450
	Huperzia lucidula									YP_209539	YP_209557	YP_209558
	Juniperus chinensis									BAE79313	BAE79314	BAE79315
	Marchantia polymorpha									NP_039288	NP_039358	P26156
	Mesostigma viride									NP_038391	NP_038438	NP_038439
	Micromonas commoda					MICPUN_107081
	Micromonas pusilla												MICPUCDRAFT_33362
	Micromonas sp. RCC299	MICPUN_62064	MICPUN_107341	MICPUN_104801; MICPUN_58266	MICPUN_96236			XP_002503439	MICPUN_93411
	Nephroselmis olivacea									NP_050887	NP_050912	NP_050911
	Physcomitrella patens	PHYPADRAFT_210987	PHYPADRAFT_119751; PHYPADRAFT_124727	PHYPADRAFT_226175; PHYPADRAFT_98257	PHYPADRAFT_152627	PHYPADRAFT_146121		XP_001770443	PHYPADRAFT_134131; PHYPADRAFT_217750	NP_904211	PhpapaCp085	PhpapaCp084	PHYPADRAFT_113036
	Populus trichocarpa							XP_002315601					POPTR_0006s10300g
	Oryza sativa japonica	4334537	4333259	4332690	4340015	4326901		CAE01504	4337415; 4349004				4338498
	Ostreococcus lucimarinus CCE9901							XP_001416225					OSTLU_16384
	Ostreococcus tauri	Ot05g05120; Ot15g01280	Ot02g04440	Ot04g02230; Ot05g01030	Ot07g02420	Ot15g02810		XP_003080144	Ot07g01640
	Pinus koraiensis									NP_817136	NP_817275	NP_817276
	Pyramimonas parkeae									YP_002600931		YP_002600954
	Selaginella moellendorffii	SELMODRAFT_174616	SELMODRAFT_230423; SELMODRAFT_235795	SELMODRAFT_144086; SELMODRAFT_233092	SELMODRAFT_108922; SELMODRAFT_93906	SELMODRAFT_89989			SELMODRAFT_142334; SELMODRAFT_150541				SELMODRAFT_423983; SELMODRAFT_424937
	Sequoiadendron giganteum									BAE79283	BAE79284	BAE79285
	Thuja occidentalis									BAE79328	BAE79329	BAE79330
	Vitis vinifera							XP_002285592
	Volvox carteri	VOLCADRAFT_107092		VOLCADRAFT_106601; VOLCADRAFT_76537	VOLCADRAFT_109643	VOLCADRAFT_80084; VOLCADRAFT_81575			VOLCADRAFT_81013				VOLCADRAFT_80530
	Zea mays	103625782	732841	100382191; 100383266	100273426				100194154; 100283531; 100381341; 100381344				100274372
	Zygnema circumcarinatum									YP_636477
red algae	Calliarthron tuberculosum									YP_007878241
	Chondrus crispus	T00008429001				YP_007627401
	Cyanidioschyzon merolae	CYME_CMM270C		CYME_CMB093C; CYME_CMO212C	CYME_CMI038C	NP_849055			CMD190C; CMG217C; CMN338C				CYME_CMT220C
	Galdieria sulphuraria	Gasu_14220			Gasu_37430	XP_005705024; YP_009051094				YP_009051077	YP_009051176	YP_009051177	Gasu_27160
	Grateloupia taiwanensis					YP_008144868
	Porphyra umbilicalis									AFC39947	AFC39857	AFC39858
	Porphyridium purpureum					YP_008965772
	Pyropia perforata									YP_009027561	AHB34965
	Pyropia yezoensis											YP_536869
glaucophytes	Cyanophora paradoxa										AIU44525	AIU44524
stramenopiles	Aureoumbra lagunensis										YP_003002239
	Ectocarpus siliculosus					YP_003289215				YP_003289237	YP_003289259	YP_003289260
	Fucus vesiculosus									YP_005090042	YP_005090083	YP_005090082
	Nannochloropsis gaditana			NGA_0624200					NGA_0495900
	Nannochloropsis granulata					YP_008519546
	Nannochloropsis oculata										YP_008519721
	Phaeodactylum tricornutum	PHATRDRAFT_50740		PHATRDRAFT_56602; PHATR_13265	PHATRDRAFT_18872				PHATRDRAFT_56608				PHATRDRAFT_46085
	Saccharina japonica										YP_006639061
	Thalassiosira pseudonana	THAPSDRAFT_270340		THAPSDRAFT_26573; THAPSDRAFT_270359	THAPSDRAFT_270378			XP_002288079	THAPSDRAFT_25574; THAPSDRAFT_270281				THAPSDRAFT_4748
	Vaucheria litorea					YP_002327580				YP_002327464	YP_002327547	YP_002327546
chromerids	Chromera velia					YP_003795267
	Vitrella brassicaformis					YP_003795421				YP_003795410	YP_003795457	YP_003795456
dinoflagellates	Heterocapsa triquetra										AAW79341
haptophytes	Emiliania huxleyi	EMIHUDRAFT_420555		EMIHUDRAFT_317426	EMIHUDRAFT_427895; EMIHUDRAFT_631929				EMIHUDRAFT_63485				EMIHUDRAFT_421924
cryptophytes	Chroomonas mesostigmatica										EU233753
	Chroomonas pauciplastida										EU233754	EU233755
	Guillardia theta	GUITHDRAFT_160283		GUITHDRAFT_164999	GUITHDRAFT_166420				GUITHDRAFT_67591				GUITHDRAFT_160205
	Hemiselmis andersenii										ABY74348	EU233750
	Hemiselmis tepida										EU233751	EU233752
cercozoa	Paulinella chromatophora					YP_002049465						YP_002049523
cyanobacteria	Acaryochloris marina	AM1_0533	AM1_4907	AM1_5564; AM1_4852	AM1_3674				AM1_1191	AM1_1539	AM1_1445	AM1_1444	AM1_1019
	Anabaena azollae 0708									Aazo_3531
	Anabaena sp. 90									ANA_C11498; ANA_C12004		ANA_C12005
	Arthrospira platensis									NIES39_L01300	NIES39_L05610	NIES39_L05630
	Calothrix sp. PCC 6303									Cal6303_1058
	Calothrix sp. PCC 7507									Cal7507_4592	Cal7507_3533	Cal7507_3531
	Chamaesiphon minutus									Cha6605_3485	Cha6605_4481	Cha6605_4482
	Chroococcidiopsis thermalis									Chro_0243	Chro_4522	Chro_4524
	Crinalium epipsammum									Cri9333_4624	Cri9333_3341	Cri9333_3342
	Cyanobacterium aponinum									Cyan10605_1486	Cyan10605_1752	Cyan10605_1751
	Cyanobacterium stanieri									Cyast_0617	Cyast_1027	Cyast_1028
	Cyanobacterium UCYN-A									UCYN_05200	UCYN_07810	UCYN_07820
	Cyanobium gracile									Cyagr_0023		Cyagr_0022
	Cyanothece sp. ATCC 51142									cce_1954
	Cyanothece sp. PCC 8801									PCC8801_2892
	Cylindrospermum stagnale									Cylst_0047	Cylst_2976	Cylst_2978
	Dactylococcopsis salina									Dacsa_1832
	Geitlerinema sp. PCC 7407									GEI7407_3804
	Gloeobacter kilaueensis									GKIL_1146
	Gloeobacter violaceus PCC 7421							NP_923824		gvip017
	Gloeocapsa sp. PCC 7428									Glo7428_1608	Glo7428_1356	Glo7428_1354
	Halothece sp. PCC 7418									PCC7418_0278
	Leptolyngbya sp. PCC 7376									Lepto7376_3140	Lepto7376_0274	Lepto7376_0276
	Microcoleus sp. PCC 7113									Mic7113_4690	Mic7113_2554	Mic7113_2553
	Microcystis aeruginosa	MAE_45780	MAE_48880		MAE_55430				MAE_13650	MAE_53860	MAE_16230	MAE_16250	MAE_22020
	Nostoc punctiforme									Npun_R4932	Npun_R4422	Npun_R4420
	Nostoc sp. PCC 7107		Nos7107_0687	Nos7107_0382; Nos7107_3837
	Nostoc sp. PCC 7120	all0278							all1743	alr3441	all5078	all5076
	Oscillatoria acuminata			Oscil6304_1371; Oscil6304_3671						Oscil6304_4765	Oscil6304_0210	Oscil6304_0212
	Oscillatoria nigro-viridis									Osc7112_5075
	Pleurocapsa sp. PCC 7327									Ple7327_2234	Ple7327_3089	Ple7327_3088
	Prochlorococcus marinus MED4									PMM0544
	Prochlorococcus marinus SS120	Pro_0319	Pro_1146		Pro_0193				Pro_0791; Pro_1537; Pro_0543	Pro_0545		Pro_0546	Pro_0424
	Pseudanabaena sp. PCC 7367									Pse7367_1691	Pse7367_0394
	Rivularia sp. PCC 7116									Riv7116_5386	Riv7116_2694	Riv7116_2692
	Stanieria cyanosphaera									Sta7437_3128
	Synechococcus elongatus PCC6301		syc0940_c	syc1955_c				YP_170905					syc2009_d
	Synechococcus sp. CC9311								sync_1162
	Synechococcus sp. CC9605									Syncc9605_0746		Syncc9605_0747
	Synechococcus sp. PCC7002			SYNPCC7002_A1000; SYNPCC7002_A1018
	Synechococcus sp WH 5701							ZP_01086192
	Synechococcus sp WH 7805							ZP_01124436
	Synechococcus sp. WH8102	SYNW0213			SYNW2287		NC_005070			SYNW1724
	Synechocystis sp. PCC 6714									D082_15420	D082_10780	D082_10760
	Synechocystis sp. PCC 6803	slr1777	slr1030	slr1055	slr0525	slr0905; sll1214; sll1874		NP_441896	slr0506	slr0772	slr0749	slr0750	slr0056
	Thermosynechococcus elongatus	tll1413						NP_682635		tll2392	tll2347	tll2345
	Thermosynechococcus sp. NK55									NK55_02205
	Trichodesmium erythraeum	Tery_4967	Tery_3622		Tery_4469				Tery_0109	Tery_3812	Tery_1532	Tery_1530	Tery_0876
	Trichormus variabilis				Ava_3899			YP_324708	Ava_0294				Ava_3341
other bacteria	Chloracidobacterium thermophilum	Cabther_A0397	Cabther_A0582; Cabther_A0765		Cabther_A0890
	Chlorobaculum parvum	Cpar_0726	Cpar_0725		Cpar_0259
	Chlorobium chlorochromatii	Cag_1620	Cag_1621		Cag_0228	Cag_0229; Cag_0114
	Chlorobium luteolum					Plut_0251; Plut_1668
	Chlorobium phaeobacteroides DSM 266							YP_910679
	Chlorobium tepidum TLS						NP_661954
	Chloroflexus aurantiacus	Caur_0117; Caur_0420	Caur_0419		Caur_2588	Caur_3676; Caur_2590		YP_001636150
	Chloroherpeton thalassium	Ctha_2074; Ctha_2443	Ctha_2073; Ctha_2442; Ctha_2504		Ctha_1284
	Dinoroseobacter shibae	Dshi_3503	Dshi_3502		Dshi_3538				Dshi_4160
	Halorhodospira halophila	Hhal_1621	Hhal_1622		Hhal_1633	Hhal_1625
	Heliobacterium modesticaldum	HM1_0683	HM1_0684		HM1_0689
	Jannaschia sp. CCS1	Jann_0146	Jann_0145		Jann_0157
	Microcoleus sp. PCC 7113			Mic7113_1943; Mic7113_3542
	Rhodobacter sphaeroides ATCC 17029					Rsph17029_1924
	Rhodobacter sphaeroides KD131	RSKD131_1600	RSKD131_1599		RSKD131_1615
	Rhodobacter sphaeroides 2.4.1					RSP_0294
	Rhodopseudomonas palustris BisA53							YP_780232
	Rhodopseudomonas palustris BisB5							YP_570899
	Rhodopseudomonas palustris CGA009			RPA1544
	Rhodospirillum centenum	RC1_2082	RC1_2081		RC1_2111	RC1_0283; RC1_2105
	Rubrivivax gelatinosus					RGE_33550; RGE_45840
archaea	Methanosaeta thermophila PT							YP_842613

## Sheet: heme
All accession numbers listed beolw are for the KEGG Pathway.
Group	Species	GTR	GSAT	ALAD	PBGD	UROS	UROD	CPOX	PPOX	FeCH
green plants	Arabidopsis thaliana	AT2G31250; AT1G58290; AT1G09940	AT3G48730; AT5G63570	AT1G44318; AT1G69740	AT5G08280	AT2G26540	AT2G40490; AT3G14930	AT1G03475; AT4G03205	AT4G01690; AT5G14220	AT2G30390; AT5G26030
	Chlamydomonas reinhardtii	CHLREDRAFT_183460	CHLREDRAFT_138524	CHLREDRAFT_186639	CHLREDRAFT_166608; CHLREDRAFT_194475	CHLREDRAFT_195943	CHLREDRAFT_132194; CHLREDRAFT_186446	CHLREDRAFT_205686; CHLREDRAFT_53583	CHLREDRAFT_191043	CHLREDRAFT_183446
	Chlorella variabilis		CHLNCDRAFT_37143	CHLNCDRAFT_137125	CHLNCDRAFT_33052	CHLNCDRAFT_34953	CHLNCDRAFT_32323; CHLNCDRAFT_48884	CHLNCDRAFT_142838; CHLNCDRAFT_33234; CHLNCDRAFT_53914	CHLNCDRAFT_57492	CHLNCDRAFT_24443
	Micromonas sp. RCC299	MICPUN_62986	MICPUN_61667	MICPUN_93011	MICPUN_78011	MICPUN_60121	MICPUN_104963; MICPUN_54920; MICPUN_96206	MICPUN_104790; MICPUN_80311	MICPUN_60613	MICPUN_96687
	Ostreococcus lucimarinus					OSTLU_5668
	Ostreococcus tauri	Ot11g00720	Ot20g00090	Ot01g02360	Ot05g01220		Ot05g01080; Ot12g02500; Ot17g00180	Ot03g03170	Ot06g03600	Ot11g02860
	Oryza sativa japonica	4349044	4346136	4341997	4328432	4331869	4326635; 4332771	4336951	4327918	4338537; 4346651
	Physcomitrella patens subsp. patens	PHYPADRAFT_172804; PHYPADRAFT_147215
	Volvox carteri f. nagariensis	VOLCADRAFT_81610	VOLCADRAFT_74470	VOLCADRAFT_72683	VOLCADRAFT_119454; VOLCADRAFT_85406	VOLCADRAFT_69473	VOLCADRAFT_74033; VOLCADRAFT_83541	VOLCADRAFT_103455; VOLCADRAFT_55865	VOLCADRAFT_83109	VOLCADRAFT_109142
	Zea mays								541866; 542554
red algae	Chondrus crispus	CHC_T00009215001		CHC_T00008491001	CHC_T00003649001	CHC_T00007253001	CHC_T00008531001	CHC_T00002160001; CHC_T00003096001; CHC_T00008857001	CHC_T00000813001; CHC_T00004880001	CHC_T00008918001
	Cyanidioschyzon merolae	CYME_CMJ054C	CYME_CMP285C	CYME_CMD104C	CYME_CME132C	CYME_CML040C	CYME_CME194C; CYME_CMP083C	CYME_CMO136C	CYME_CMB025C	CYME_CMS035C
	Galdieria sulphuraria	Gasu_39730		Gasu_54890	Gasu_43810	Gasu_13390	Gasu_52210	Gasu_19740	Gasu_09770	Gasu_58560
apicomplexa	Plasmodium falciparum 3D7			PF14_0381	PFL0480w		PFF0360w	PF11_0436	PF10_0275	MAL13P1.326
	Toxoplasma gondii			TGME49_053900	TGME49_071420		TGME49_089940	TGME49_023020
stramenopiles	Nannochloropsis gaditana								NGA_0387300	NGA_0074800
	Phaeodactylum tricornutum	PHATRDRAFT_54134	PHATRDRAFT_50966	PHATRDRAFT_50723	PHATRDRAFT_51811	PHATRDRAFT_44610	PHATRDRAFT_16140; PHATRDRAFT_19188	PHATRDRAFT_12186; PHATRDRAFT_15068; PHATR_10640	PHATRDRAFT_31109	PHATRDRAFT_45357
	Phytophthora infestans			PITG_13832		PITG_10080	PITG_00566	PITG_18296; PITG_18298	PITG_01514	PITG_14808
	Thalassiosira pseudonana	THAPSDRAFT_270328	THAPS_258111	THAPSDRAFT_270280	THAPSDRAFT_9021		THAPSDRAFT_270346; THAPSDRAFT_719	THAPSDRAFT_31012; THAPSDRAFT_38022	THAPSDRAFT_264901	THAPSDRAFT_270314
haptophytes	Emiliania huxleyi	EMIHUDRAFT_456638; EMIHUDRAFT_462917	EMIHUDRAFT_437052	EMIHUDRAFT_448062	EMIHUDRAFT_423968	EMIHUDRAFT_54852; EMIHUDRAFT_54867	EMIHUDRAFT_361296; EMIHUDRAFT_435069	EMIHUDRAFT_432924; EMIHUDRAFT_61042	EMIHUDRAFT_450126; EMIHUDRAFT_463658; EMIHUDRAFT_74870	EMIHUDRAFT_456245; EMIHUDRAFT_53434; EMIHUDRAFT_419645; EMIHUDRAFT_452759
cryptophytes	Guillardia theta	GUITHDRAFT_115635	GUITHDRAFT_166481	GUITHDRAFT_160911	GUITHDRAFT_162740	GUITHDRAFT_70083	GUITHDRAFT_154354; GUITHDRAFT_76641	GUITHDRAFT_164330; GUITHDRAFT_181316; GUITHDRAFT_88140	GUITHDRAFT_98119	GUITHDRAFT_157086; GUITHDRAFT_159124
ciliates	Paramecium tetraurelia			GSPATT00010579001			GSPATT00006394001	GSPATT00007017001; GSPATT00016653001		PTMB.433c; GSPATT00000033001
	Tetrahymena thermophila			TTHERM_00636900			TTHERM_00047580	TTHERM_00716050	TTHERM_00157800	TTHERM_00439000
amoebozoa	Acanthamoeba castellanii			ACA1_258320		ACA1_190010	ACA1_333350	ACA1_058760	ACA1_115400
	Dictyostelium discoideum			DDB_G0269444	DDB_G0284697		DDB_G0292294	DDB_G0288893	DDB_G0292040	DDB_G0288891
opisthokonts	Aspergillus clavatus			ACLA_026820	ACLA_014820; ACLA_061420	ACLA_086050	ACLA_029590	ACLA_027130		ACLA_012760
	Drosophila melanogaster			Dmel_CG10335	Dmel_CG9165	Dmel_CG1885	Dmel_CG1818	Dmel_CG3433	Dmel_CG5796	Dmel_CG2098
	Homo sapiens			210	3145	7390	7389	1371	5498	2235
	Laccaria bicolor			LACBIDRAFT_296233	LACBIDRAFT_181601; LACBIDRAFT_248667	LACBIDRAFT_318859	LACBIDRAFT_191778	LACBIDRAFT_159108; LACBIDRAFT_317133		LACBIDRAFT_313652
	Monosiga brevicollis			MONBRDRAFT_26688				MONBRDRAFT_28565
	Mus musculus			17025	15288	22276	22275	12892	19044	14151
	Saccharomyces cerevisiae			YGL040C	YDL205C	YOR278W	YDR047W	YDR044W		YOR176W
	Schizosaccharomyces pombe			SPAC1805.06c	SPAC24B11.13	SPAC31G5.08	SPCC4B3.05c	SPAC222.11	SPAC1F5.07c	SPCC320.09
cyanobacteria	Acaryochloris marina	AM1_5760	AM1_0549	AM1_3071; AM1_4803	AM1_3944	AM1_1388	AM1_6351	AM1_0615	AM1_5767	AM1_1959
	Microcystis aeruginosa	MAE_30010	MAE_38680	MAE_22850; MAE_39770	MAE_42680		MAE_31290	MAE_06700
	Nostoc sp. PCC 7120	alr1042	alr3265	all4725; alr4380	alr1878	all0287	all3909	all0650		alr3751
	Prochlorococcus marinus SS120		Pro_0482	Pro_0243	Pro_0494	Pro_0134	Pro_1079	Pro_1737		Pro_0525
	Streptomyces coelicolor	SCO3319	SCO0401; SCO4469	SCO3311	SCO3318; SCO7343	SCO2958	SCO6031			SCO5859
	Synechococcus sp. WH8102	SYNW1117	SYNW1809	SYNW1933	SYNW1785	SYNW2210	SYNW1495	SYNW2040		SYNW1747
	Synechocystis sp. PCC 6803	slr1808	sll0017	sll1994	slr1887		slr0536	sll1185		slr0839
	Thermosynechococcus elongatus	tll1738		tll0422	tll1646		tlr0741	tll0684
	Trichodesmium erythraeum	Tery_0949	Tery_2741	Tery_4608	Tery_4621		Tery_1714	Tery_1166	Tery_2218	Tery_0602; Tery_4313
	Trichormus variabilis	Ava_3699	Ava_4920	Ava_1946; Ava_3297; Ava_B0225	Ava_4774	Ava_3075	Ava_1788	Ava_4581; Ava_4996		Ava_1574; Ava_2754
other bacteria	Bacillus anthracis Ames	BA_4698		BA_4694	BA_4696	BA_4695	BA_1070		BA_2418; BA_1072	BA_1071; BA_1158
	Burkholderia xenovorans LB400	Bxe_A0437		Bxe_A0344	Bxe_A3411		Bxe_A0044	Bxe_A3261		Bxe_A3965
	Corynebacterium diphtheriae NCTC 13129	DIP0400	DIP0409	DIP0403	DIP0401		DIP0407			DIP1280
	Escherichia coli K-12 MG1655	b1210		b0369	b3805		b3997	b2436		b0475
	Listeria monocytogenes EGD-e	lmo1557	lmo1685; lmo1553	lmo1554	lmo1556	lmo1555	lmo2212		lmo0884	lmo2211
	Mycobacterium tuberculosis H37Rv	Rv0509	Rv0524	Rv0512	Rv0510	Rv0260c	Rv2678c			Rv1485
	Neisseria meningitidis MC58						NMB0781			NMB0718
	Neisseria meningitidis Z2491	NMA0760		NMA1011	NMA0718
	Nitrobacter hamburgensis			Nham_2240			Nham_2936	Nham_3246		Nham_3415
	Pseudoalteromonas atlantica	Patl_2564		Patl_4219	Patl_0342		Patl_0245	Patl_0029		Patl_3987
	Ralstonia solanacearum GMI1000	RSc2900		RSc2989	RSc2357		RSc3303	RSc2192		RSc2643
	Rhodospirillum centenum			RC1_1353			RC1_2798	RC1_3420		RC1_2797; RC1_3547
	Rhodopseudomonas palustris CGA009			RPA2712			RPA1509	RPA1514		RPA0875
	Rickettsia prowazekii Madrid E			RP539			RP885	RP882		RP884
	Sphingomonas sp. MM-1			G432_13715				G432_02050
	Staphylococcus aureus subsp. aureus ED98	SAAV_1659	SAAV_1914; SAAV_1654	SAAV_1655	SAAV_1657	SAAV_1656
	Staphylococcus aureus subsp. aureus N315						SA1652		SA1650	SA1651
	Vibrio cholerae O1 biovar El Tor N16961						VC0332	VC0055		VC0987
	Vibrio cholerae O395	VC0395_A1757		VC0395_A2413	VC0395_A2398
archaea	Pyrobaculum aerophilum	PAE0601	PAE0594	PAE0583	PAE0580	PAE0589; PAE2593; PAE2594
	Sulfolobus tokodaii	STK_02120	STK_02150	STK_02140	STK_02170	STK_02180
	Thermoplasma volcanium	TVN0590	TVN0635	TVN1100	TVN0634	TVN0633	TVN1292
	Picrophilus torridus	PTO0918	PTO0248	PTO1311	PTO0249	PTO0250	PTO1413
