# Supplementary material for: Patterns in evolutionary origins of heme, chlorophyll a and isopentenyl diphosphate biosynthetic pathways suggest non-photosynthetic periods prior to plastid replacements in dinoflagellates
Source: PeerJ. 2018 Aug 3;6:e5345. doi: 10.7717/peerj.5345 (PMC6078071; doi:10.7717/peerj.5345)
Supplement: Supplemental Information 5 — This table provides the contig/accession numbers, A + T contents of the coding regions, presence/absence of the spliced-leader sequence and the actual nucleotide sequences of the transcripts assessed in this study. [file peerj-06-5345-s005.xlsx]

## Sheet: heme
protein	sequence name used in Fig. 2	contig number or accession number	total basecount of ORF	AT content in ORF(%)	SL	contig number or accession number of nucleotide sequence	full-length nucleotide sequence (sense strand) SL sequences are highlighted in red.
GTR	Karenia-1	0173944140 Karenia brevis CCMP2229	1779	45.5874	nd	lcl|CAMNT_0014979881 /NCGR_SEQ_ID=MMETSP0030-20121228|7592 /TAXON_ID=156230 /ORGANISM="Karenia brevis, Strain CCMP2229" /LENGTH=2050	GCCAACCTGATGCTGTTAGGACTCACCTCCGTGGTGTCAGCAGTAGCGATGCTGCTTCTGCCGATCCCTCCGCCAGCTCAGCCTCTTCCAGTTACACCCAGACAGCGGCTTTGGCAGGTCTCTGCGCATTCGCCGTGTCGGCAAGCCACGGCCTCCAGCGTCGCACTCGTCGGGCGAGGCATGGGGGCGGCCGGCTGCGGAGTTCCCTGCGGGTGACCTCGCTAGATACGGAGGTGGCCCAGCGGTCGAGCAGCATGGTGGTTCGCCAGGAGGAGGGCCTTGAAGACTTCGATAGCGTTGAGACTGAAATTGCTCAGTTCGTGCCAAGAATCTGGGCACTGCAGAGACAGGCCGAACTTCTCCGCAGTGGAGAGCTACAGAAAGTGGTCTCAGCAATGA…
GTR	Karenia-2	0173766322 Karenia brevis CCMP2229	1254	51.0367	nd	lcl|CAMNT_0014778287 /NCGR_SEQ_ID=MMETSP0027-20121228|214475 /TAXON_ID=156230 /ORGANISM="Karenia brevis, Strain CCMP2229" /LENGTH=2108	TTTTCATAACATTGACCATGATGAAGAGTGCACTTGCACTCACAGTTGCTTGTATGGCCTGCGTGGGCTATGGACGGCGATTGCACAGCGCACTGCAATTGGATGCTGAGGCTGCTGCGGCATTCAATCCCTCCGCTGCAGGAGTGCAGCTCTCCCGCAGCAGTCCCAGCCTCGCCGCATCGAGCCCCCAAGTCCTCGGCGGGCGTCAGGACTTGGGTCGCGTGGCCCCATTGACGAAGATGGCAGCACAGGCAGTGGCTGAGCCGCCGGTGCAGCAGGGGAAGGAAGGAGTCCAGGGTGAAGCACTCGCCAGGCNNNNNNNNNNNNNNNNNNNNNNNNNNNNNNNNNNNNNNNNNNNNNGAAGCACTCGCCAGGCCGAAGGATAAGGCACCTGATGAG…
GTR	Karlodinium-1	0169242318 Karlodinium micrum CCMP2283	1791	52.5405	nd	lcl|CAMNT_0009322505 /NCGR_SEQ_ID=MMETSP1016-20121227|32478 /TAXON_ID=342587 /ORGANISM="Karlodinium micrum, Strain CCMP2283" /LENGTH=2164	GTCCGAGCGCTTCTTCATTGAGGAGGAATGAAGTCGCTGATCCTGCGAAGCATATAGCAAGCGCTCGGCAGAGTGCTCGC AGCCGTCATCTCAGAGGAGAGCCGCATCTTGCCATCGTTGCAGAAGCCAATGCAAGATGGGGAAATGTCGCTCTCTTAGT TGCAGGACTTAGTGGATTGGCTGCAGGCGTGGCGCGTCGCAAGACCGAGGGCAGAAGAAGAACAAACGCACGCCTTGCAA AGGGTTCGCGTGTCATGGCTCTCAACGTCTCGGCTGATAGTAGCCTTGAGACAAGACGAACGGAAGAATTGGATAGCGTA GAGGCAGCTCTTACCACATTTGTGCCGAAAATGATAGACCTTCGAAATCAGGCTCAGCTTCTCCGAAGCGGCGAG…
GTR	Karlodinium-2	0169115198 Karlodinium micrum CCMP2283	1678	52.2646	nd	lcl|CAMNT_0009177623 /NCGR_SEQ_ID=MMETSP1015-20121227|29209 /TAXON_ID=342587 /ORGANISM="Karlodinium micrum, Strain CCMP2283" /LENGTH=1693	TCATTGGTTGATATGATTCTTGGACTCGTCTCTGTTATACTACATTCCCTGATTTGTTGGAGCGTTGGAAGCGCGTCAGAACCGCAAGAAACGTCGTTACAGGATCGCAGGCGACCTGAGAAGCCTTCCTCTTTGGCAAGCTTCCTTTTGGCAAGCAATCCTCGATTCACACATGGATCGACTATGGTTGTTGGTCGCCGCAYTGTGCCTGGAAAGATGGTTCTTGCTTCATCACCTCCGAAGGTCCAAGCTACCGCAATTGAGTTGGAGAAGACACTCTCCCAGCACAAGGAAGTTCAGGCTGCAAAAGCTGAATTGCAAGCGAAAGTAGATATTGACAGAGCGATCGTTAGTCCGACTTCTACGAAAGACGAAGCACAGGACGATGCAAGAAAGATA…
GTR	Lepidodinium-1	comp33846_c0_seq1 Lepidodinium chlorophorum NIES-1868	2112	45.9754	nd	gnl|LepiRNA|LepiRNA33846_c0_seq1 LepiRNA33846_c0_seq1 [Lepidodinium chlorophorum NIES-1868]	GTGACTTTGGTCCAAACTCGAAGGGCATGGGCCGAGGCATTGTTTTGATCATGGCCGCGGTGAGGCAGCTTGTTGCAATTTTTCTCGTGACCGTTGCTACTGCAAATCTGGCGGCAGCATTCGTGGTCGCACCAGCAGCTGCCGCAGCGAGCAAGAATATCATTGTTCCTGGAGCGCACCTCCGAGGCACCATCAGCGCGCACCAAAATGCCGCCAACGAGTCAGCTGCGTGGACTTCTGTGGCCGGACTTATCGCTTGCCTTTGCGGCTTTGGCGCCAGTTTGGGCGCCGCCACCCGCCGCGCATCGGCCCAGCGAAGGGCGAGAAAAACAGGACGCCAGGCGACAGCGACACCTGGCATCCGCGTCACTGCCATCGAGAAAGTCCAGGCCACGGACG…
GTR	Lepidodinium-2	comp92172_c0_seq1 Lepidodinium chlorophorum NIES-1868	2316	44.5164	nd	gnl|LepiRNA|LepiRNA92172_c0_seq1 LepiRNA92172_c0_seq1 [Lepidodinium chlorophorum NIES-1868]	AAACAAAAACATCTGTATGCCTCAAGCATGCCCCCAGAAATATCCACCTGGCAGCCAGTTAGACTGGAGATACCGCTTCG AGGCATACAGATGTTTTTGTTTCTTTTCTTGACGCAGATGATGCAGGTTGCAACCAGTCAGGAAGCCTCGGACAGGCTAA TAGATAGGATGGCTGATACATTATTTCACCCTGCGCTCAGGGCGTGGCCGTTGCAACAGATGTCGCCTATGCAAGGCCAT CACTATCTTAGTACGGCGCCGCATCCGGGCCTACGGGGCATCGGGTCGTCACCAGCTGGTGTCGCGTGGTTGAACCACTT CCAGACTCTTGTACGCGCCAGATCCGTGAGCTCGAACGTGGGTAGTTCCCAAGTACAGAGCCACACTGAGGTGCC…
GTR	Lepidodinium-3	comp80736_c0_seq2 Lepidodinium chlorophorum NIES-1868	2481	45.3043	nd	gnl|LepiRNA|LepiRNA80736_c0_seq2 LepiRNA80736_c0_seq2 [Lepidodinium chlorophorum NIES-1868]	AAATTCTGCATCTGCCCCACGGGGTGGCGCATGAATGCTTAACCATACATTCCGCACCCCGCCGCAATTTCCTGTTCAAGAATAGTTCCCCGAGACGCGCTTCGCATCTCAGGAACGCTGGAGGTTCGGACATATCATGTTGAGCACTATGTCTGGTATTTTTTTGCTGATCTCCGTCGTGCAGGCGGCACATACCGCTATCACGACAGAGTTTACAAACATGTTGGTAGACAATTGTGTTGACAGGCTGCTGCAGCGGACTTTGAAGTTGCAGTCTCATCGTCATGACCTCCGCGGTGCACAGTCATTTGCCACTCGGTCTCCCATCGGCCATGCTCCGACATGGGCAGTGCCCAGCGCCATCAGTGGCTTCACGCGTGTTTCCCATAGCGATATTCA…
GSAT	Karenia	0174148230 Karenia brevis CCMP2229	1500	47	nd	lcl|CAMNT_0015215491 /NCGR_SEQ_ID=MMETSP0031-20130131|75078 /TAXON_ID=156230 /ORGANISM="Karenia brevis, Strain CCMP2229" /LENGTH=1561	GTCGGTTGTCTAATTTAGTTCGCCTGAGATTCACATAGTCCTTACCTAAACATGCAAAAACCAGCTTTCCTCTTGGTTTGCCTGGCCTGCGTTGGCCACGGGCGGCGAGTGCAAGCACAGTTCGAGCAAGCGCAGAGCAATCCATCGCCGCTGAGCGCCCTGTCGGCAGTTCTCCAGGCGCTGAATTCAGAGGCGTCTTACAATCCTTCTGGTCTGGGAGCACAGCAGACTAAGAGAGTCTCCAAGTCGCGTACCGCACCTTCCCCCATGGCATTCGTAACTGAGAAATCGGACAAAGTCTTCACAGAGGCGAAAGATTTGATGCCAGGTGGTGTCTCAAGTCCAGTCCGTGCTTTCAAGTCTGTGGGTGGAAATCCAGTGGTTGTTGATCATGTCAAG…
GSAT	Karlodinium	0169080304 Karlodinium micrum CCMP2283	1357	49.3736	nd	lcl|CAMNT_0009140019 /NCGR_SEQ_ID=MMETSP1015-20121227|10407 /TAXON_ID=342587 /ORGANISM="Karlodinium micrum, Strain CCMP2283" /LENGTH=1614	TACATTTTTATTGTCTTTGGCTTGCTTGCTATGGTCAGCTCAGGTCAGAGGAGTTCACCAAGAACCATCTGATGCATTCT CAAAAATGCTTCTCGCACTGAATCCAGCAAGTGCCCGTAGTTCTAGTAGCAACGCCAGGGCTGCGAGGGCGGCTCCAGCA AAGGCATTTGTAACCGAGAAGTCTGATGCCATCTTCGCAGAAGCGAAAACACTGATGCCAGGTGGTGTGTCCAGTCCCGT GCGTGCTTTCAAGTCTGTTGGTGGGAATCCAGTCGTTGTCGAGAAGGTGAAAGGAGCTTACATGTGGGATGTGGATGGCA ACAAGTATATTGATTATGTCGGAACTTGGGGACCAGCAATTATAGGGCACGCCGATGATGTTGTACTTGATGCTT…
GSAT	Lepidodinium-1	comp77636_c1_seq10 Lepidodinium chlorophorum NIES-1868	1629	47.7594	nd	gnl|LepiRNA|LepiRNA77636_c1_seq10 LepiRNA77636_c1_seq10 [Lepidodinium chlorophorum NIES-1868]	TCTCAAGCGCTATTTTTCAAGGATCGCCTCCGTTGCCAGAGGCGGTGTCCTCCGTCGTGCGTATGACGGTCATGTTTGTG ACAAGAAAGACTGGCGTGACGTGGAGTTGGCTCCGCATAGCATTATTCGTTGGGGGGCTCGTCATTAGCCAGCTTGTTGC CACGTCAATGAAAGTTTGTAAGGGCTTGGTATTCACGATCGCCAAAACGTTTCCAACTTACGGCTCCGCTACGAATTCTC TTCGTGGTTCCTATTACCGCACCGAGATAATGCAAAGACATGTTACTGCATCCGACGGGTCCTCGTCGACTGGCGCCGTC ATGGTAGCTTTTGCGGCTTGTGGCCTTGCTTCGAGAGGCTTTCGGCGAAGGCGGCGCAAAGACGCCAATGCTTGT…
GSAT	Lepidodinium-2	comp86847_c0_seq1 Lepidodinium chlorophorum NIES-1868	1605	49.2212	nd	gnl|LepiRNA|LepiRNA86847_c0_seq1 LepiRNA86847_c0_seq1 [Lepidodinium chlorophorum NIES-1868]	GGGAGGCTCAAGGCGATCGAACGCTTTTCAGCTTTGATTGAGACAAAGCAAGGATCATGCGCACCGTCAGCGTAATCACT TTGCTCTCTGTCGTCTTGCATGCTGCTGATGCCGACGAACTGGATGGGAAGGACTCCTCCCTAGCTGAGAGAAGAGATCC AGTAATAGACAGCATATTCAGTCGGGCATTGCAGGCGCACCCACTTGCAGCTTTCGAAAATTCAACGCTTGGGAAAACGG GCCGCCTTGCGCTTCCACATACTCCGAAGGCCGCGATCGCACCCAAACCCGAAAGGAGCATTGGTTCCAGGTGGGGTTGG TGCACTGGTCTTCAACACACTCCTCGTGGTGCCATCCAGATCCGCCAGTCTACAGTGACGGAATTCAAGACAGAC…
GSAT	Lepidodinium-3	comp196565_c0_seq1 Lepidodinium chlorophorum NIES-1868	978	53.8855	nd	gnl|LepiRNA|LepiRNA196565_c0_seq1 LepiRNA196565_c0_seq1 [Lepidodinium chlorophorum NIES-1868]	TTTGGCTGTTTCGATGGTTCCGGGCATAGATAAGATCCGTTTTGTAAACAGCGGTACCGAAGCATGTATGAGTGCAGTACGCCTGGCACGTGGATACACGGGAAAGGATAAGATCATAAAATTTGCAGGGTGTTATCACGGTCACAGTGATTCGTTCCTCATTGAAGCAGGTAGCGGTGCTGTTACCTTTGGTGTCCCAAACAGTCCAGGAGTCACTGCTGGTACTGCCAGAGATACTCTGCTCGCTCCATATAATGATCTTAACAGGGTAAGGGAGCTCATTTTGGAGAATAAAGGAGAAATAGCCTGTATTATCCTGGAACCTGTAGCAGGAAATATGGGATGTATTCCTCCGGCCGACGGATTTTTGGAGGGATTACGCGATTTATGCAACGAAAA…
ALAD	Karenia	0173985684 Karenia brevis CCMP2229	1293	49.1106	nd	lcl|CAMNT_0015027399 /NCGR_SEQ_ID=MMETSP0030-20121228|54193 /TAXON_ID=156230 /ORGANISM="Karenia brevis, Strain CCMP2229" /LENGTH=1379	GTTAGCTTCGCAATACAGTTGCATATTTTCGTCATGCGCAAGATTTCCGTTGTGCTGGCTTGCCTGGCCTGCGTGGGTCATGGATCGCGGTTGCAAAGGGTTCCACCTGCAGAGAGTCAGCAACCGCTGACGGTAGCTGATGCGCTTGCAATGTTCCTAAGTGGTTTCAGTCCGGAGGCTGGCTTCAAGCCATCCAGCCCAACTGTGAAATTTGGCAATGGCCTTGGTCGCCATTCCCCATTGATGCAAGATGGGGTTCTAAAAACGCCAGAGGGAGCGAAGGTGCCTGAGGGAACGCCAATCGTCCCACATATAGGTATTCGCACGCGCATGCGACGCAACCGTAGAAGTAAAGCTATACGGGACATGGTTGCTGAAACAAAGCTGCTGCCTGCAAAC…
ALAD	Karlodinium	0169115526 Karlodinium micrum CCMP2283	1260	51.0317	nd	lcl|CAMNT_0009177971 /NCGR_SEQ_ID=MMETSP1015-20121227|29383 /TAXON_ID=342587 /ORGANISM="Karlodinium micrum, Strain CCMP2283" /LENGTH=1358	CAAGCTTGGTCAAGTCAAGTCACGCGTTGGTTGCTTAAGGTCATACAGTTGAGTTCAAGATGACAAGTTTGATGACATGGGCACTTGCCTTCCTTTGCTCTTGCGTTTGTACCGCGCACAGAAGCAAATCTCCTGATATGCGTACCGCAGGTAGTACCGATCCTCGTGCGTCTCTCGCTTCAATATTCTTCGCATCGAATCCATCAGCGAGGGCGCAACGCAGTTCTGCGAAATCCTTGCGGTCGCTAACCCGTTCACCAAGTTTGATGCAAGAAGCGAAAGTTCCAGAGGGAACTCCAGTTGTATCGGACATGGGAATTCGGAAACGTCCTCGCCGCAATCGTCGAAGTGCAGTAACGAGAAAAATGGTAGCAGAGACCCATCTATCGGCCGCAAACT…
ALAD	Lepidodinium-1	comp100813_c0_seq1 Lepidodinium chlorophorum NIES-1868	1395	45.1613	present	comp100813_c0_seq1 Lepidodinium chlorophorum NIES-1868	TGTTCGCAGCAACGGGAGAGCAATTTTGGTTCAAGGCCCAAGCTTGAAAGGGGTCGATTCCTCATACTGTGGGGATCCATGCGCGGCACAGCTCCTGCTCTTGCTGAGCCGCTTCTTTGGATGGCGGTACCTCGAAGTGTTCGCAGCAACGGGAAGCTTTCCTCGCTCTTGTTACTTGCTTGCGGCCTTGCAATGATGTTGAGCTGGGGCCCACCCACCCGCAATGCTGGCGAGCGGCAAGTGGCGACAATAAACTTCGTTCAACCGCTATCAAGTGTTCCAGAAAGATTCCAACCGTTAGTCGCATCCGCTTCTTCAACAAGAGCACACGATCTCGTCGCAGGCGACTTCACCCACAGACCAATTCGATTCCCTTCTTCACGTGCTGTTGAGGTCCGC…
ALAD	Lepidodinium-2	comp213547_c0_seq1 Lepidodinium chlorophorum NIES-1868	831	54.8736	nd	comp213547_c0_seq1 Lepidodinium chlorophorum NIES-1868	CCATGCCGGGCTATTATCGATTAAGCCTGGACCTGCTAGACAAAGAGGCAAAGACCTTATGGTCGATGGGATTAAAAGCTGTGCTGCTTTTTGTAAAAGTTGCCGATGAACTAAAAGACAACACAGGTAAAGAAGCTTTAAATAAGAATGGCCTCATGCAGCGTGCTATTCAAACTGTGAAAAATGCGGTTCCCGAGATGCTTGTAATGACCGATGTGGCTTTGGACCCCTATTCCAGCTATGGGCACGACGGGATTGTTTCTGAAGGAAAGATACTTAACGACGATACAAACGCTATCCTGGCCGAAATGTCTTTATCTCATGCCATCGCAGGAGCCGATTTTGTTGCGCCCAGCGATATGATGGATGGGAGGGTGTTCGAGATAAGGACTTTACTTG…
PBGD	Karenia-1	0173664682 Karenia brevis CCMP2229	548	45.6204	nd	lcl|CAMNT_0014660569 /NCGR_SEQ_ID=MMETSP0027-20121228|25555 /TAXON_ID=156230 /ORGANISM="Karenia brevis, Strain CCMP2229" /LENGTH=549	CCTCGGCACCCGCGGGTCTCCGCTGGCCTTGGCGCAAGCGTACGAGGCCAAGCGCCGTCTCGCCGAGAGATACCCGGAAC TTGCAGCCGAGGGCGCTGTCGAGATCCAGGTTATTTCCACTACTGGTGACGAACGACTTGAAATCTCGCTGGCTGAGATT GGGGGCAAAGGATTGTTTACGAGAGAGCTTGACTTGGCTTTGGCCAACCAGGACGTGGATTTCTGTGTGCACTCGACAAA AGATGTACCAACTGTATTGCTGCCGAACACGGAGCTCGTCACCATGTTACCTCGGGAAGACACTCGCGATGTTCTCATCA CTAGAGATCCCAGCATCACTCGAATAGAGGACCTTCCCAGTGGCAGTGTAATTGGCACAGCATCTTTGCGCCGTC…
PBGD	Karenia-2	0174104254 Karenia brevis CCMP2229	1299	43.341	nd	lcl|CAMNT_0015164351 /NCGR_SEQ_ID=MMETSP0031-20130131|9643 /TAXON_ID=156230 /ORGANISM="Karenia brevis, Strain CCMP2229" /LENGTH=1635	TCAAGATCTCAAGGATATTTGTGCAGTTGGCTATTGAAAACAGCATACTTCATTCAACTCAGGTTTCTGGTAGCCATGCA CATGATGATCTACATCGTGATGGCTTTCTTGGCCTGCGCGGGCCATGGTCGCAGAGTACAAACAGTAAGCAAGAACGTAG GAAGCGATGCAAACAACGACATCAGGAGAGTTGCATTGAGAGCGCTTTCACGGTTTGCAGCAGCGAATCCGTCAGCTGCA TGGCAATCGAATGGCGTGAGACACACGAGGGGCCTCCCTCAGCGGAGGCAGCGCATGGCCTCCGTCCACATGGCAGAGCC TGTCCTGAAACTGGGCACACGCGGATCTCCGCTTGCCCTGGCACAGGCATACGAGACAAAGCGCCGCTTGGCAGA…
PBGD	Karlodinium-1	0169355422 Karlodinium micrum CCMP2283	1038	52.3121	nd	lcl|CAMNT_0009452069 /NCGR_SEQ_ID=MMETSP1017-20121227|26964 /TAXON_ID=342587 /ORGANISM="Karlodinium micrum, Strain CCMP2283" /LENGTH=1309	TTCGCATGCGACACCTAGACAAGTGCAGCGCAGAACCAGAATTTCGATGTTGGAGCCTTTCCTTATTGGGACTCGTGCGTCTCCTCTCGCCAGGGCTCAAGCCAACGAGACGAGAGATAGATTATTGGAGGAATTCCCTGATGTCTTCTATGATGCACAAGATCCGAGCGTTGAGCCTGATGACAAAAAACGAGGGATTAAAATTTCACTTATCAAATCAARWGGKKACAATTTGMGTRCATTCGATGAAAGATGTTCCTACAGATCTCGTGCCAGGCACAATCTTGCCATGCAACTTGCCGCGCGAGGACACCCGTGATGTTTGGATCTCAAGCGAGGCTGATTCACCAGAGGATTTGGCAGACGGAGCTGAGATTGGCACAGCATCACTTCGGCGGC…
PBGD	Karlodinium-2	0169217900 Karlodinium micrum CCMP2283	1220	51.8033	nd	lcl|CAMNT_0009295849 /NCGR_SEQ_ID=MMETSP1016-20121227|19150 /TAXON_ID=342587 /ORGANISM="Karlodinium micrum, Strain CCMP2283" /LENGTH=1540	CCTCGGCACGGCGATTTCTTCGCGAAGAATGCAAGGAAAGAGCGCCGAAGGAAAGGCACTACATGGGGCACGAGAGGCGT TCGCCTCACTCCTTTTTTCATTAGGCGCCGKTTCGCATGCGACACCTAGACAAGTGCAGCGCAGAACCAGAATTTCGATG TTGGAGCCTTTCCTTATTGGGACTCGTGCGTCTCCTCTCGCCAGGGCTCAAGCCAACGAGACGAGAGATAGATTATTGGA GGAATTCCCTGATGTCTTCTATGATGCACAAGATCCGAGCGTTGAGCCTGATGACAAAAAACGAGGGATTAAAATTTCAC TTATCAAATCAAGTGGGGACATGATCCTTGACTTGCCGCTTACAAAAGTGGGTGGGAAGGGCGTCTTTACAAAAG…
PBGD	Karlodinium-3	0169259902 Karlodinium micrum CCMP2283	1361	52.4614	nd	lcl|CAMNT_0009341975 /NCGR_SEQ_ID=MMETSP1016-20121227|42213 /TAXON_ID=342587 /ORGANISM="Karlodinium micrum, Strain CCMP2283" /LENGTH=1527	TTTTGAGACTTGATCGTTGGTTGTCTGATGCCAGATTTACATTGCTTGTAATGAGACACGGTGTGTACTTGTTTGCATGC TTGGCAACCGCCACTTATTCGAGGCAGAAAGAGATCTTCGAAGGAAGTGCAGCCGAGGAGTCTATGAGGAGTCAACCAAC CCCTCAGGAAGCATTTACATCACTTCTTCTGTCGCTCGGTGCAATGCCCAAATCGAACCTTAGATTCGCACAGCGAAGAG CTAAAGCTTCAATGAAAGAATCTCAGGCTTTCGTGATCGGGCATGACGATGCGCCTCTCGCCAAGGCTGAAGCAGAATTG GTGGCAAGTAAATTGTTGGATGCATTCCCCGACAAATTTGGCGATGGAAAACGAAAGATTGAGTTTCATGCTCTC…
PBGD	Karlodinium-4	0169202984 Karlodinium micrum CCMP2283	1257	52.3469	nd	lcl|CAMNT_0009279997 /NCGR_SEQ_ID=MMETSP1016-20121227|11224 /TAXON_ID=342587 /ORGANISM="Karlodinium micrum, Strain CCMP2283" /LENGTH=1344	GATTTTTAAGTGTTGGTTGCGACATTGGCGAATTTCCCTTGAGGTTTGCCAGACTACCTCCTTCGAATGAGATGCATTTCCTGCTTCGTAGCATGCTTGGTCACGGCGAGTCATTCTCGACGGATGCAAGGGAAGAGCGCCAGAGAGAAGGCATTACTTCAGGCACAAGAGGCCTTCGCCTCACTCCTTTTGTCAGTAGGTGCGGGTTCACATCTGAATCCTAGACAAGTGCAGCGCGGAAGCAGAATTTCCATGTTGGAGGATTTCCTCATTGGGACTCGTGCGTCACCTCTCGCAAGGGCTCAAGCCAACGAGACACGGAACCTGCTATTGAAGGAGTTCCCTGATGTTTTTTATGATGCGGAGGACTCCAGCGCGCGTGATGATACAAAACGCGCG…
PBGD	Lepidodinium-1	comp35568_c0_seq1 Lepidodinium chlorophorum NIES-1868	1497	44.2886	nd	gnl|LepiRNA|LepiRNA35568_c0_seq1 LepiRNA35568_c0_seq1 [Lepidodinium chlorophorum NIES-1868]	GGCGATTCTGCTCACTGTAGTTACCCCTTGTAGGCCGATTTGAAGCATATGTCAGCTCTGAGCGTTGGCCACTCGCAAGT GTTGCAGGACCTCCACTACATCCGAATCGATCGGGAAGATCTTAGACATTCCAAAACCAAATTGGTCAGGCTAAGTGTTC GTGGTATTTGCATACTTCTCTGCTTGGGGGTCACTTTCACCAGCTTTCGGTGGAAGTGTCCATCAGACGAACGCAGGTTT TGGCCTTTTTGGGTGCCTTCCTCTGTGAACGCTGTATCGACAGTGCTGGTGGAGATCGTGTACGGCCCACGGATTCCAAG CACGCTGGGCGTTAAGCATGCAAAACACTCCCATGCGTGCTTGCACCACGTGTGGAGTGGTGATGTGCATATTTC…
PBGD	Lepidodinium-2	comp91161_c0_seq1 Lepidodinium chlorophorum NIES-1868	1368	44.4444	nd	gnl|LepiRNA|LepiRNA91161_c0_seq1 LepiRNA91161_c0_seq1 [Lepidodinium chlorophorum NIES-1868]	TTTGGGTTATATTTTCTGCCTCGAAGGTTATGGCGGTGTAAGCAAGCTTTGTCGAAGCGAGCTCTGTTTTTGAGGCTAGG CAACATTGGCATGTCTTTGGAGAATCATTACATCCGAGTTGAGCCAGAGCACTCTAAACATTCTAAGTCGACGCTTTTGG GTTATATTTTCTGCCTCGTCTTGAGCTTGAGTGCCGCAGTCGCCATATCATGGTTGACTGGCTCGCATGGCTTGCAAACT TCCAGAGAGAACTTGCCGCCGTCAGCATTGGTGGCGCTTGCGCCGAGCTTAAGGACGCCCAGCCTTGTGCCGCGCTTGCC CACTCCAGCATTCCAGCCTTCCATGTTGAGTCGACAAACTAATCCGCGTCATGGCGTCGTGCAAAGAGCGGCCGA…
UROS	Karenia	CO063310	720	41.5278	nd	CO063310	GCACGAGGATCAAATAGGCTGAGTTGAAAAGTTGGCTGCATCAATTTTGAAGATCAGTCTTGTGAAGCGC ATGGACAGACCCTGGAGATCCTCGGATGCAGACATGGACAGATCCAGACTTTCAAAACCATGGTGTTGAA TGATAGTTGGCCTCCTCTCATGCTGATCAGAGGATGGGCCGCGGTCGTCGAGGACGCTGGGTGATAATTG CATTCTGCGGTCAAGCTCTTCTTCTGTCCTGGTTGCGGCAGGCTTCAGACTTACGGGCTGCGGCGGTGCC CAATTCAAGCAGCAGACACACTGTACGCGTTGCTCTCACGCGTGAGAAGGGCTGCAATGACAAACTGCGC CGGCTGCTGGAAGAGAAGTTGGCAGATCTCCCCATTGCTGCTGC…
UROS	Karlodinium-1	0169208488 Karlodinium micrum CCMP2283	2882	51.5961	nd	lcl|CAMNT_0009285861 /NCGR_SEQ_ID=MMETSP1016-20121227|14156 /TAXON_ID=342587 /ORGANISM="Karlodinium micrum, Strain CCMP2283" /LENGTH=3428	TGTATCTGTACAGGCGTTGCGCGCAGAAAGCGTCCTTCTTATGATTCGAATAATCCTCTCTCAGTGCTTGCAGAAGTTCT TCTCGCCTCAAGTCCTGCAAGGAGATTGCGGCACAGTCATGTTGGTTACGGTCCTTCTGTCATGAAAGATTCAAGCTCCA CGACTATTACTCGACGCTCGGCGCAAAGCTCAACGCTTATTGCGCAAAAACCGTCGCCATTGAAGGTAGCCTTGACTCTG GAAGATGGTAAGAACAGAGAGTTACAAGCAGCAATTTCGAATGCTTGCAAAGACTTACCTTCTGGAGCCTTGGAGTTTGT AGAAATTCCCTTGATCCACTCTGTTCCAGGTAAAGACTTGGCGGCATTAGAATTTATCCTTGAAAAATTTGCCCT…
UROS	Karlodinium-2	0169295394 Karlodinium micrum CCMP2283	681	49.7797	nd	lcl|CAMNT_0009386499 /NCGR_SEQ_ID=MMETSP1016-20121227|64475 /TAXON_ID=342587 /ORGANISM="Karlodinium micrum, Strain CCMP2283" /LENGTH=683	CACGTCTTGAGCTAGGAATCATTCGTGAATCGGCATTGGCATTAGCAAATAAGCGCATCTTACTACTATCCAGCTCTCAC GAGACACAGGCTCTAGCTAGATCTATTGTTAATAGTGGCGGTCGGCCATTCTGGTGTCCTGCAGCTCAGGCAGAAAACTT GGATGATTATTCGGATCTTGACGATAAACTTCAACGCGTGATCGAATATGATGCTGTCTTTGTGCATACCGTCTCTGCAA TTGACGCTGTAGCCGCGCGAGCTTCGACAAGAGGTGTTAAGGGAAGTCCCTTTCTGGGCGTTCCCGTAGGTGCAATAGGT GATGATGTGAATTACTTGGCAAACAAATGCGGCGCAGTTGCTTCTGTGACGACCGAGAGCGGTTCCGAGAAGCTG…
UROS	Lepidodinium	comp839_c0_seq1 Lepidodinium chlorophorum NIES-1868	1218	41.6256	nd	gnl|LepiRNA|LepiRNA839_c0_seq1 LepiRNA839_c0_seq1 [Lepidodinium chlorophorum NIES-1868]	GCGAGGCTGAGGAGGGCGAGGGCTCAAGCGTGCCACAATGCACGGCGTTATCATGATTTTTCCTTTTACTGCTTTTGGCA GTTCTTATGCCAGGAAGCCGCCACCAAGTTACGTAAGCTGCAATGAAAGTGTCGTCTCGTTGTGTGGGATCTGCGAGGCA GAGGAGGGCGGTTTCCGCAGTGGCTGCTCTGACAGCTCTTGTTTTGGGTCCCAAAATATCTTACGTGAGGCCGCATGACA TCTATAGTGTTGCCCAAACGAGTCCGAAGTTGGCACACAAATTTCATAATCAAGCAGATATGGTCGTCAGCGATGTGGCC GATCATCTGACCGACAACTTGGTCAACAAGGCGCTAAAACCGTCACCCGTGCTTCGTGCAAACTTAGATCGTAGG…
UROD	Karenia-1	0173889316 Karenia brevis CCMP2229	2037	46.2445	nd	lcl|CAMNT_0014920361 /NCGR_SEQ_ID=MMETSP0029-20121228|178552 /TAXON_ID=156230 /ORGANISM="Karenia brevis, Strain CCMP2229" /LENGTH=2050	ATGGCCGGCGAATGCAACCTTCGACAGGGCTGCTACATGGCAGTCGGCCGCCGGAGTTTGCTGAGACAGCTCGGGGGTCT AGTCAAAGAGTAAGTGCTGAAGGCGCAGTTCACATGTTCAGTGCGTTGACCCTGCCTCTTCTAGCAGCACACTCTGTAGC TGCATGGCATCATCCCTCAGGTGTTCTTGGCCACAATGCAAGAGACCGCCTTGGGAGCCGCGTTGCAGGTGTGAGCATGA AGGAACAGCAAGATGGCGCAATTGCATCGGTGCAAAAGCAGTTTGCCATCGACGTGTCAGACGTGATCAATCCGGAGCGA CCCCCTATAGACTATGTGCGGCTGCCGGCGGAGGCATACAATGTGTTGGACAATTCTGCTGTGAAGCGATTGGAG…
UROD	Karenia-2	0173802408 Karenia brevis CCMP2229	1347	44.4692	nd	lcl|CAMNT_0014818121 /NCGR_SEQ_ID=MMETSP0029-20121228|15485 /TAXON_ID=156230 /ORGANISM="Karenia brevis, Strain CCMP2229" /LENGTH=1351	CACATGGCTGCCCTGGTGCTGGCTTGCCTGTTCTGGGTGGGCCACTCTCAGCAAATCGAAGCCTCAATTGCGCGATTGGG CAGCAGTCATTTGCCAGAGAGACAGCACCACCTCTTGCGGTCGAGCAGACAAGCTGGCACCATTGGTAAGGCCAAAACGT TAGAAGCATTGTCCAGAATTCTTCTGGCATTCAGAATAGCTGCTGGGTCTGACGGCGTGGCAGATCCTGGTCTGGTCCGG GCGTCGAAAAGCAATGCTGCTCCTGCAGCTGTTTCCATGAGTGCCAGTAAAGATCCGCTACTTGTGCGTGCTGCCCGAGG TGAAACAGTAGAGCGCACACCAGTCTGGATGATGCGACAGGCAGGACGGCACATGGCAGCGTATCGTGCGCTCAC…
UROD	Karenia-3	0173945920 Karenia brevis CCMP2229	1428	46.6387	nd	lcl|CAMNT_0014981849 /NCGR_SEQ_ID=MMETSP0030-20121228|8627 /TAXON_ID=156230 /ORGANISM="Karenia brevis, Strain CCMP2229" /LENGTH=1657	TGTCTTTTCGAACACAGCAATGCAGAGGGTCGTCTCTGTCCTAGCTTACCTGGCCTGCGTGGGCCATGGAAAGCGGCTGC AAAGACCAATGGAACATCTGCACAAAAGACCACCATTGGAGGCAGCCAAATTTCCCAGTTTGCAGTCATTTGCTGAAGCG AATCTGCTAGATGGACAAGGTAGACTCCATCCATTAGAAACAGTAGCGTCATTTTTCTTTGCTCTGAATCCTCTTGCTGC CTTTAACAGAAACCTGGCCGCTGCCTTGGCTCCAGCCAGTGCGACTCTGGCCAACAGGTCCCCGGCGCCACGGGGAGGCC CTTGTATGGCTGTGGCAACAGTCATGCCGACGGAGAGCGGTGTGAAAATCTGCGACTTCACTCGCAAAGCTATTG…
UROD	Karenia-4	0173653438 Karenia brevis CCMP2229	1224	41.9118	nd	lcl|CAMNT_0014648057 /NCGR_SEQ_ID=MMETSP0027-20121228|18185 /TAXON_ID=156230 /ORGANISM="Karenia brevis, Strain CCMP2229" /LENGTH=1229	CGAACATGCACATATGTTGGTTTCAATTGGTTTGTGTAGCCTGCGTGGGCTACGGACGCAGAGTGCAGACTCCAACTTTGCAGCTGCAGAATCGCCCGCTCGCAGAAAGCCAGCGGCCTGCAGAGGCCACCTCTGAAGCTCTTCTGGCACTCCGTCCGGTCTCTGCATACAACCCTTCGATGTCAAGTGCGCGTTTCGCTTTGGCAAGGCGATGCCGCACCAGCTCTCGCCAGGTCGCACCGATATTGGCTGAACACGCACCCGCACCACTGCTCAATGACTTGATGGTGCGAGCCGCGCGTGGGGAGGCCACAGAAAAGACTCCTGTCTGGCTCTTCCGGCAGGCCGGCCGCCATCTGCCCGAGTACAACGAGTACAAGCGAACCACAGGCAAAAACT…
UROD	Karenia-5	0173962192 Karenia brevis CCMP2229	1467	44.8534	nd	lcl|CAMNT_0015000289 /NCGR_SEQ_ID=MMETSP0030-20121228|19052 /TAXON_ID=156230 /ORGANISM="Karenia brevis, Strain CCMP2229" /LENGTH=1520	TCCGCTGCGCTGATATGTTTGTTTTTGCTTCTCTGGGATCGCCTTCTCCACACTCTTTGGGGCACGGCTTCTCTGGAAAT GGCAGACATCATCTGCAAGCCCCGCCACCGCAAAGAATAGCGAGGCAGGCCAACGCTGCAAGAGATCCAAGCGCCTTTGC TTCAGACTGGTCAGGCCCAGTAGGGATGGCGGTCGTTGGTGGACTCTGTGTGGGTGCATCGAGCCGCCATGCAGCAAGGC GAAGCCGACACCCGTGCAGAAGTCGAGCTGCTTCCGCATCTGTGCACGCGCTTTCTCCACAGGGCGCTGCTGCAGTGGAA ACAAGTGCCCCTGGCCCAGATTTTAGCGACATTGCGCAGGCACCTTCTAATCTCCGAGAGTGGCGTGTTCAAGAA…
UROD	Karlodinium-1	0169276646 Karlodinium micrum CCMP2283	957	52.0376	nd	lcl|CAMNT_0009363853 /NCGR_SEQ_ID=MMETSP1016-20121227|53152 /TAXON_ID=342587 /ORGANISM="Karlodinium micrum, Strain CCMP2283" /LENGTH=1185	CGTACAAAACCCTTTTGATATATTGTGGACTGATCAAATCCCACTGAGAAATCTAGAAGCCTTCAGCAAAGTTCTTTTGG CGTCGTCACTACCTGGCCATGCTGGCGCGTCGCGTCCAGTCCAACGCACCGATCGACGTGTTCGTTCCTCCATCAGCGCA GCTGCTCCAGAAACCCTCCTCGTGCGTGCTGCTCGCGGCGAAGAGGTTGAGCATACGCCAGTCTGGATGATGCGTCAAGC TGGTCGGCACATGCAAGCATATCGAGATCTAGATGACTCCTTAACGTTTCGTGATCGTACCGAAAATGCAACGCTATCTA CTGAAATAACGTTACAACCATTTGAAAGATATGGCACGGATGGGGCCATACTCTTCTCTGACATCCTCACGCCTT…
UROD	Karlodinium-2	0169333044 Karlodinium micrum CCMP2283	773	50.5821	nd	lcl|CAMNT_0009428239 /NCGR_SEQ_ID=MMETSP1017-20121227|15049 /TAXON_ID=342587 /ORGANISM="Karlodinium micrum, Strain CCMP2283" /LENGTH=1206	GTCGCTTTTGGGCAACGGGCGGCGCGTACAAACGCCATTAGATCCAGTAGAGATCAAAGAAGCACGCAGAAATCACGAAG CTTTCGGTGAATTACTTTTGGCATCTTCGCAACATAGCCGCATAATCCAGTCACGTCGGGAGCAGCGTAGCGACGTGCGG CCGAAGGCATCGATGACCGAAGCTAGCAGTGATCCCATTCTCTTGCGTGCTGCACGTGGAGAGAAGGTCGAGCATACTCC AGTCTGGATGATGCGTCAGGCTGGACGGCATATGCAGGTTTACAGAGATCTCATTGCCAAGTATCCCACTTTCCGAGATC GTTCTGAAAACGTTGAAACCTCTAAAGAGATTTCTTTGCAGCCATATGAAAGGTATGGTACTGTACTGATGGCGT…
UROD	Karlodinium-3	0169231014 Karlodinium micrum CCMP2283	1257	52.9833	nd	lcl|CAMNT_0009310069 /NCGR_SEQ_ID=MMETSP1016-20121227|26260 /TAXON_ID=342587 /ORGANISM="Karlodinium micrum, Strain CCMP2283" /LENGTH=1732	TCTATGATGTTGCTAATACACTTCACGAACACATTATTTGCTCGGCGAGTGCAATCGATGGCACGAGCAAACGCTTTTCAGGATTGGACACCAGAGAGCGGTGGCCTTTGGCAAGTAGTGGACACGAACACTGCCGAGTCTGGCTTGGACAGCTTGAAGCAACAGACAGAAGAACATCCTCCAAATCCTCTTGCGAGCCTTTTTCTGTCATTGACTCCTATATCTGATCGTTCAATTTCGAAACGAACGAATGTGCGCATGGATGCCCTCGGGGATCGTGACATTCTCGTTCGCGCAGCAAGAGGAGAGCATGTCGAACGAACTCCTGTTTGGTTGATGCGTCAAGCTGGAAGATATATGGCAGAATTCCGGAAGTACAGTGACAAGTATCCCTTCCGC…
UROD	Karlodinium-4	0169182992 Karlodinium micrum CCMP2283	689	51.0885	nd	lcl|CAMNT_0009258335 /NCGR_SEQ_ID=MMETSP1016-20121227|393 /TAXON_ID=342587 /ORGANISM="Karlodinium micrum, Strain CCMP2283" /LENGTH=1436	GTTCAAACGCCAATCGAGCATTTACCAGACGCGCGCGACGAACGACTGGCGGGCAGGGAGAGACATTCGGACAGTGTGATGCACGATCCACGCGATGAGCAGCCAGCTTCGTTTTCACAGCTTCTGTTGTCGTTCAATGCAGAAACTTCTATGGTTTCTTCTGCTGCTCGTGCTGCTCCGCGAAGTTCTCTATCCTATGTGTCCTTAAGTGAGAAGTCATCGGATTCTCCAATGGTCCGTGTTGCCCGCGGCGAGTCCGCAGATAGCATACCTGTCTGGATGTTTCGTCAAGCGGGTCGGCATCTACCCCAGTACAGACAATACAAAACGGATACTGGCAAGATATTTTTAGACTTCTTGAAGAGCCCACAAGATATGCTGACGTTGACACTTCAACCT…
UROD	Lepidodinium-1	comp101059_c0_seq1 Lepidodinium chlorophorum NIES-1868	1413	48.903	nd	comp101059_c0_seq1 Lepidodinium chlorophorum NIES-1868	GATTAATCTTTGAAGCCGTTAGTCGCACCATGTTGTGATATTGATTGCGCGAGCTGGCTTCAAGTACCAATGCGCAGCGT CACCGTAATCCCTCTATTGGCAACTGTCGCTATGCTCGATGCCGAGGACCCCAGTGACAAGTTGGTCGACAAGTTAGTTG CGAATGTTCTCAGTCTGGACCACGACGCAGACCTGCATGACATGGCGTTTGGGAAGCCTGGACATGTTGTGGCTCCTTCC CGCTCAAGTCGCGCATCGCCTCGGCTTGTTAATGGGCTGCAGTTCTGCTGGAAGCCGCAGCCGAACGGCCTCATGCAAGT CCGTGGTGTTCGCAGTACACAGGGTGCTGCTCTCTTCGTGCGAGCAGTCGCTCAGGAGGGAAAGTCGGACACATC…
UROD	Lepidodinium-2	comp144032_c0_seq1 Lepidodinium chlorophorum NIES-1868	1470	47.2109	nd	comp144032_c0_seq1 Lepidodinium chlorophorum NIES-1868	GGTTCATTTTTGCGTGTCGTGACGGATAGATTTAGCCAGCCTTCTGGGCACCAGCCGCAGCTATGGAGCGTCAGCCGCTT GCCATGCTCAATGCAGCGTGGGTGACCACAAGACTTGTGCCAGCACAAACAAACAACTTCAGGCATGGTGATCGACATTT ATTTCTTGCGCGTCCGACGACCTCCTCTTCGCCATCGTTTGGTGGCGCCACACCACAAATTCACAAGTTCTTCGCGCTTG TGGTTGGGGCGGTGATATCGACGTCATTGTCATGGAAATCCCGCGGTTCCCAAGCGAGCTTCGCTGTGCCATTGTCGCGG CGTGGCGTAAACATCAGATTGGGCAGGCGGAGGATCGTGAGCATTGCTACACCATTCCGTCGTGCCGTAGTACTG…
UROD	Lepidodinium-3	comp109512_c0_seq1 Lepidodinium chlorophorum NIES-1868	1578	45.057	nd	comp109512_c0_seq1 Lepidodinium chlorophorum NIES-1868	TCCTTCGCGTGCCGGCTCAAGTTGGCTCCAGCAGGGTTTTAGCGATGCTGCTGTGGAGAGGCCGTTTTCTCGAACTTCGAGGATCGATGAGCAAGCCACAACTCGCTCTTGCCGAGTCGCTGCTTCATGAATCGGTTCCTGGCAGCGTTTGCCGCGACGAGAAATTTTGCACGCGCCTCTTCCTGCTCATCGGCTTGGGCGTCATGATGATGATGAACCGAATGCCAGATACTCATAGCTTTGGGCAAGCGGCCACCACCAACATGGCCTTGCTCCCGCGAGCAGCTGGAGCAGGCACTGTGCAGCTACTTCGCGGCTGGTCACCCAGCTGGTGCTCCCGATGGCGAGCGGCCAGTCTCCAGATTGCTGCTCCACTTGCTCCGCGATTGAGCGAAGGAT…
UROD	Lepidodinium-4	comp13953_c0_seq1 Lepidodinium chlorophorum NIES-1868	1899	46.4455	nd	comp13953_c0_seq1 Lepidodinium chlorophorum NIES-1868	GATCTTTGTTGTTCAATCGCTCGAACCGCTAAATGCAATGCCAAACTCCACCGTCGATCGCGTTGCGCCGCTCTTGCAGG AGAGCGCTCCCCGTAGCGCCCGTGGTGGCAGACGCCTCATCGTTTGTTGTTTGTTCATCTGTGTTGGTCTTACAGCGTTC CCTGGCTCGGTGCCGTCTGTCCGCGGCGACGATTGGCGACAGCGCACGCATATCGAGCCTGCCATCGTCTTGGCACGAAC CGATCCGACCACCGCTGCACGTGCAGTGTCTTTGCACAGCTGGCGGCATGGTACGCGTGTGAAGGTTGCTCCGAAGGCAC ATTCCTTGCATTCTCCAGGCCACCGTTGGAGCTTACTCGGTATTGGCAGGGGGGCGAGCCGTAGCTTACCATTGC…
UROD	Lepidodinium-5	comp67210_c0_seq1 Lepidodinium chlorophorum NIES-1868	3804	45.1367	nd	comp67210_c0_seq1 Lepidodinium chlorophorum NIES-1868	GTTGGAATACATGGACAGTTGCCAAATCTATGCCGGAACCACGTTTCGTTCTCGCCGAACCGTTGTTTCGGGACACTGTT GCGCGTCGAGCCCGCAGCGGTGGGAAAATTCTGACGTTCCTTTCCTTACTCATCGGATTGGGACTTGTGACGTTCCTAGG AACAGAGTTGTTCACCCGTGGTGAAGGCAGGCAGCGCATTTCCGTCCAGGAAGCTGCCGTTCTTATGGGTTCCACGCCAC CAGTGGCTGCGAAAACAGCAGCAGTGGGTGCACGCCTGGTACGGGGCTGGGTGAACGGTTGGTGCTCTGCTTGGCGTACG ATTGGTGCTCAAACGGTTGAATTGTCTGCGTCGCGATCGGGAGAACGGCTTGTCTCATTCGCTGCTAGCGACTCG…
UROD	Lepidodinium-6	comp150338_c0_seq1 Lepidodinium chlorophorum NIES-1868	882	50.4535	nd	comp150338_c0_seq1 Lepidodinium chlorophorum NIES-1868	TGGAGCACCATGGACACTCATGGGCTACATGATTCAGGGCGGCGCCTCGACTACTTTTGATATTGCGAAGAAATGGCTCT ATCTCTACCCTGAGGCATCAAAAAGGCTTCTCGGAGCACTTCGCGACATAGTTATTGAGTACCTCATCGGGCAGTATGAC GCGGGTGCCCCTCTTCTACAAATTTTTGATACGAACTGCGGTGAGGTACCACCTGGCGTCTATGAGCAATTCTGTGTTCA AGACCTGAAGTACATCGCGACTGAAATCAAGAGACTTCGGCCGCATGCCCTCATATCCTTGATGCCGAAGGATGGCGAAA TTGATGTGTTCGATGACAGCGAGTACGACGTCGTAGGTGTAAGTTGGACATTATCACCAGCATATGCGCGAAGCG…
UROD	Lepidodinium-7	comp130613_c0_seq1 Lepidodinium chlorophorum NIES-1868	1509	43.8038	nd	comp130613_c0_seq1 Lepidodinium chlorophorum NIES-1868	GGGCTTTCCAGGTCGTTGGGGCGATCCTGCATCGCAGCAATTTCAGCGGAAGCTTGGGCTGAGGACCGAAAATGGCGTTG GCGCAATTCGCTGCGACCTCGCCACAGATGCCTGCCAATGTGTTGGATGGAACTAGGAGTGCAGCGTCAGCAGCTGTTTC CAGGAATCCGTCGCGACTGGCGCGGTTTGAAGCGACGCCCTCTGGATATCTGTTGCGGGGCATGCTCCAGGGAGGCACTG CGATGGTGGCAGCGGCGGTTGGTTTCGGTGGGTGGGCCGCCAGGCGCCGCAAACGCGATTTTTCGACGCCTCTGCGAGCG AAACATGGTACCAGGCACCGTTCAACGCAAATCCTTAAGTTACAGGTCGTCCCGCCGAGAATAGATGGACAAGTC…
CPOX	Karenia	0178299624 Karenia brevis Wilson	954	43.0818	nd	lcl|CAMNT_0019901349 /NCGR_SEQ_ID=MMETSP0649_2-20121207|43212 /TAXON_ID=156230 /ORGANISM="Karenia brevis, Strain Wilson" /LENGTH=1126	CGCTGCTGCTGCTGCTACCGCTGCTGCTGCTGGCGCTGCAACCACAGCAGGCAGGAAGCGACTGCGGCGACGAGGTAAAT CTCGTATCTTAGTTGCACAGGCGCAGGCCCAGGCGCAGCAGGTCGATGTCCAAGCCGAGACTCTGTGTAAGGAGAGTGAT GCTCCGGATTCGATGCGCCGACGATTTGAGGCCGTCTGCCGCGAGGCGCAGGAGCACATCTGCAGCGCCATCGAGGAAAT CGATGGCAAAGCGACGTTTTGCAGGGATGCTTACACGCGGGAATCGGGCGGCGGTGGCTTAAGTCGTGTGCTGGCAGATG GCGATGTCTTTGAAAAGGCTGGTGTGAACCTCAGCGTCGTGTACGGCAAGATGTCCCAGGAGGCTCTGCGGGCTG…
CPOX	Lepidodinium-1a	comp186503_c0_seq1 Lepidodinium chlorophorum NIES-1868	903	56.0354	nd	gnl|LepiRNA|LepiRNA186503_c0_seq1 LepiRNA186503_c0_seq1 [Lepidodinium chlorophorum NIES-1868]	TATCACCGCGATAGTAATTGGAATTTCTGCCTATGGATTATCAGACAATATTGGGAGCCTGATCTCAAAGGCCTGGGTATGGGAGTGGGGAGCAGAAACTTTCAGAACCATAAGCAATATTGTAGGAGGAATCGTGATCGTTGCACTGGGGCTTATATTGTATAAACACATCGTTATGGCGCTTAGCGCTCCCTTTATGAGTCCTGTATCCGAGAAGATAGAGGCACATCTTATGGGTACCACACGTGAGCACAGAAAAACTTCCTTCGTTTCTCAACTTTGGCGGGGGATCAAGGTAAACGGCAGAAACCTGTTAATGGAGCTTTTCCTTTCCATCCCCATTTTTATAATTAGTTTCATTCCGGTTATTGGTTTTATCTCCTCTATTCTCCTATTCCT…
CPOX	Lepidodinium-2	comp44233_c0_seq1 Lepidodinium chlorophorum NIES-1868	1416	50.3531	nd	gnl|LepiRNA|LepiRNA44233_c0_seq1 LepiRNA44233_c0_seq1 [Lepidodinium chlorophorum NIES-1868]	TCCAGCTTATCGATCGCGCTTTTTGTGGACCCAGTTGTGGTTCACAACATCCTTGTAAATTGTGGACCATGGACAATTGGGTCGAGGCATGAGACTGGTTGCTGCAGGCATAAGGCATTCGCTTATACACGGCTTTCTTCTATGTGTCGGCATTTTCCTCGGTCGAAGAGACGGGGTATTCCGTGCAAATGCATTACGACCGTTTTGATAGCCTTCGTCGCCTTGGCACATGCGAATGAGTTGTGGGAACATCAGTTGGGAAATCATTCGGGGCACGCGCAGAAAGCCATGGGCAGTATGGTCAAGGTCTTTAGGGGGTCACAGATTTACGATGCGTACGACGATAGCACGCTGGGCAAACTCGGGCGTCTTCAGGTGCCCACATGTAATCCTTCCTTC…
CPOX	Lepidodinium-3	comp44233_c0_seq2 Lepidodinium chlorophorum NIES-1868	1791	50.8096	nd	gnl|LepiRNA|LepiRNA44233_c0_seq2 LepiRNA44233_c0_seq2 [Lepidodinium chlorophorum NIES-1868]	AAGGCTTTCAGAAGAGCATCAGAAAGAATCCACACAAGGTTTTTATAGTTTTTGTCACGCCGCCAATCACTGCAACTCCC ATAGTCACTCTCCGAGCCTCTATGGACCTTTGCCTGAGCCAATTTGCTTGTGCTTGGGGCTCTTCACCAAGTCGAAGGTG AAATAGCTCCCAGTCTGAAGGATCCAAAGGGCGATACATAATGATCCCTGGGAAAGCAACTGATCGTTTCTCACATTTAG TCTTGGATCTTGGTTTTCGTCAGCTCGCATCACACCCAATCACGTGGCTTATGTAACACATCCATCATTTTAGCCTCAGG GCTACCTTCCTTAATCTGATGTTTGTATTCCCAAGCGATGAGAGGTGGCGCACTGACCATGATGGCTTCCACCCT…
PPOX	Karenia-1	0174085696 Karenia brevis CCMP2229	1071	43.324	nd	lcl|CAMNT_0015142833 /NCGR_SEQ_ID=MMETSP0030-20121228|220326 /TAXON_ID=156230 /ORGANISM="Karenia brevis, Strain CCMP2229" /LENGTH=1250	GGGAGAGGATATTGTGCTTGCAAATCCCAAGTCGTATAGGTACGTGTGGGTGGACGGGAAGCTGCGAGCATTACCAGCCA GTTTTTCTGATGCGGTCTTTGGTGATTTCTTGTCGATCGGTGGCAAGATTAGGGCACTCCTCGGTGCCTTTGGCTTCAAA AGACCCATGCCAGAACATGAGGAGAGCCTCAGAGACTTTGTCACCCGCAACTTGGGAGAGGAGGCCTTCGATAATCTCGT CGACCCTTTTGTGAGCGGTGTCTATGCCGGAGACCCAGCGAAACTCTCTGCAGAGGCTGCTTTCGGCCGTGCGCACGCCC TTGAGAAAAAGGGTGGGTCACTTTTCGGCGGCGCTCGGCGACTGAAGAAGGAGAAAGCGAAAGAGAGCCAGGGAA…
PPOX	Karenia-2	0173913076 Karenia brevis CCMP2229	1909	43.164	nd	lcl|CAMNT_0014946489 /NCGR_SEQ_ID=MMETSP0029-20121228|208873 /TAXON_ID=156230 /ORGANISM="Karenia brevis, Strain CCMP2229" /LENGTH=2235	GTGAAAATAGCTGATTTCTTTGCATACGTCGACTAGCATGAGCCTTGCCGCCCTGGTGCTGGTTTCTCTTGCCTGTGCAGGCAGAGGCAGTGGGCGGCGAATGCGAATGATGCCCGAGCAAGTTCAAGGCAGATCTTCCGAACAGGTTGAGACCTCGCCAAAGGCATTGAATTCGCTTTCGAGCTTTCTTTTAGCACTGGCGCCAACATCTGGATGGACAACTACGGGACACGGTGGTCAGATCGTGCTAACGGCAAGACCCGGTGTGGTAGCGAACTGCTGGCCTCGCGGCAACCTTGCAGCCGCAGTGATGGCTGAGCCAATAGAGGCCGACTGCCTTGTTGTGGGTGCTGGCATCTCAGGCTCCACCCTGGCACACAACCTGCATCGGCGAGGTGT…
PPOX	Karlodinium	0169395544 Karlodinium micrum CCMP2283	1928	49.3776	nd	lcl|CAMNT_0009499543 /NCGR_SEQ_ID=MMETSP1017-20121227|50701 /TAXON_ID=342587 /ORGANISM="Karlodinium micrum, Strain CCMP2283" /LENGTH=1965	TTCGCGTACATTGCTTATGGCTGCCATGGACGCAGGATGCAAGCTCAACTACATGACAGGCAGCGGCAGTCGCGAACGGG CGATGTTAAAAATCATTTGCATTCCATAAGGGACTCGCACCTTTCAGAGCAAGATGAAGAGCTCGATTCTTTCACAGGAT TTAAGCAGCTCCTTTTGGGTTTCGCTGCTTCCACAACTGGCTCACGCAGATCTCACGGTAGACACTTTCTGAACAGTCAT TTGGACCAYGTCCAAGACGCATCGTGTGTTTCTTGCGTATGGCAAGCGCCCCTTGGTGCTGGACAGCTATCGCCCGAGTG TGAGCCGCGAGCTTGTTTGTCGCGCAGTGGTGCAACAACCATGTCTGCCGAGCAAGAGCCGTTACAGGCTGATTG…
PPOX	Lepidodinium-1	comp112996_c0_seq1 Lepidodinium chlorophorum NIES-1868	1830	42.8962	nd	gnl|LepiRNA|LepiRNA112996_c0_seq1 LepiRNA112996_c0_seq1 [Lepidodinium chlorophorum NIES-1868]	CTTTTGTAGAGGATTACGATTTTCTTATTTGTCCGTAAAATGCGATGTCTTTGTTTCTCCTCCCCAGCGCGGCGGATTCGACTCCCGCCCTTCGTGGCCATGCGTTGCACTCATCCCGAGCTGTCGTCGTTGCGGTCGGTGTTAGCATGGAAGCTCATGCAAGCAACTTGGCGAAGCTCGATGCGCCGCATCGTTGTGGAGCTATCCAAGTATCAGCGGCGTGGGCACTAGCCATCGGTTTCAGCTTAGGAGTTGGCCAGCAGAGACGTAGAGCAAAACGTTCTAAGCGAAGCGCCAAGTCTGCGTTGCATGTAAGTGCCGCTCAACGAGGAAACATGGTTAACGCCAAAATCCACCCTGGACTGCGGGAGACGCTGGATGTCGTTGTCGTCGGCAGTG…
PPOX	Lepidodinium-2	comp21517_c0_seq1 Lepidodinium chlorophorum NIES-1868	1830	48.4699	nd	gnl|LepiRNA|LepiRNA21517_c0_seq1 LepiRNA21517_c0_seq1 [Lepidodinium chlorophorum NIES-1868]	GCTGCTTAGGTTCAAAGCCACAGGGCGCGTAATGCATTAACAAACATTGCGCGTTTCGGTTCAAAGGCACAAGTCGTGTA ACGCAGTAACCAAAATTCAAAGGACATTCTTGCGTTACGCGTGTCCAAGTACAGTTGTGGCCGACAGCAATTGTTTGCAC GGGAGGAAAATAATGTATGGGAGCATCGGAGTCGTCCTGGTTGTTGTCATCGTGCGCTGTCGTGCCCAGGCCGACGACTT GGTTAACATGATATCAGCGCGGGCGCTCAATGCATCGCCGCTTCGACGCACAGATGTTGAATTGACGACGCTTGGAAAGC TTGGTGAGGCCGCGTTCAGTCCTTCCAACGGTCGTCTTCACAGCTGGTCTGGCTTATCGAGTGGCTTTACCTCAA…
PPOX	Lepidodinium-3a	comp24448_c0_seq1 Lepidodinium chlorophorum NIES-1868	1593	43.4401	nd	gnl|LepiRNA|LepiRNA24448_c0_seq1 LepiRNA24448_c0_seq1 [Lepidodinium chlorophorum NIES-1868]	GCTTGACTCTTTCGCGCTTTGGCCTGGTGCGGAATCCAGGGTGCTGGACCATGGCGGCGCCCGCGGCAGTCTCGACGGCA CTACCTCGGGTCTGCGTGCTCGGTGGTGGACTTCCTGGTCTGACGACAGCATTCCTCTTGCAGAAAAAGCTCCCGCACGC AAGGATCTGCGTTGTCGATCGTGTGGTTACTTCCAGAGATTGGCACGGCAGCGTTCTATCGACACGCGGTCAGAATGGGC GTGTGTTCGAGAGAGGCTTTCACTCGAGCATCTTGGTGAACAAGCAGGGCCGGGAGGCGCTGGGTTTGTGTCGTCTCCTC GGTCTCGACGACGACGTCGTGAGCGCAAATGTCGAAGCATCAGCACGCAGGCACTTGCTGCACAATGGGCGAGTG…
FeCH	Karenia-1	0173708630 Karenia brevis CCMP2229	1098	49.1803	nd	lcl|CAMNT_0014714705 /NCGR_SEQ_ID=MMETSP0027-20121228|133182 /TAXON_ID=156230 /ORGANISM="Karenia brevis, Strain CCMP2229" /LENGTH=1219	CTCTGAGAAGAATCGGACTTCCCCATGTGCTTGTCACATGTGCGATGGCGCTTGTGCTCAACCGGTTCATGTCTCCAGTG CCACTGCAGCAGGCTTTTGTGGGCAGACTGCCAATTCCAGCCCGGCAGGCTCTCTCACAGAGCAGGGCCAGTGCCAGTCA ACATCACGACACTGGTGTCATGATTGCAAATTTAGGTAGTCCTGAGGAGCCCACAGCTGCTGCAATCCGTCCGTTTCTCT CAGAGTTTCTTCATGACTACCGAGTTGTAGATATTAGCCGATGGCTTTGGTGCCCCATTCTTCATGGCATCATACTGCGT TTCAGACCCTCTAGGATTGCAGAAGCATACAAGGCAATCTGGACATCTGAGGGTGCGCCTCTTCTATCAATTTCC…
FeCH	Karenia-2	0173900314 Karenia brevis CCMP2229	525	47.0476	nd	lcl|CAMNT_0014932569 /NCGR_SEQ_ID=MMETSP0029-20121228|193708 /TAXON_ID=156230 /ORGANISM="Karenia brevis, Strain CCMP2229" /LENGTH=527	CGCACATACTCTTTTCTGCGCACGGGCTTCCTTCTGACTTTCTTGAAGCAAATGCTGACCCATACAAGGCACAAACCGAG GCGACAGTCTCTCTCACAACAGAACGCCTCCGTGAGCTTGGCTATACAAACAATATCACGCTTGCCTACCAATCGCGCGT AGGGCCAGTTGAGTGGCTGAGGCCATACACAGACGACAAGATCCGTGAATTGGCCACGCTTGGGGTGCGGGAGCTTGTCG TAGTACCTATCTCCTTCGTTAGCGAGCACATCGAGACACTCGAGGAGCTCGACATGGAGTACAAAGAGGTTGCCGAGGAA GCAGGCATTACCAACTGGCAACGTGTGCCTGCCCTCGGCGTTGATGGCGCATTCATCAATGATCTCGCCGAGGCG…
FeCH	Karenia-3	0173862386 Karenia brevis CCMP2229	1461	48.3231	nd	lcl|CAMNT_0014889875 /NCGR_SEQ_ID=MMETSP0029-20121228|129978 /TAXON_ID=156230 /ORGANISM="Karenia brevis, Strain CCMP2229" /LENGTH=1559	CCATAGAATTGAACATGTTCAAGGGTGCCCTTGCGATAACTTGCCTAACCTATTTGGCTCATGGACGGCGAGTACAAGGCCGTCATGATGCCGAGAGCCGAACGGCTCCCACTCCTGCACACTCGATTGCCGTAGTGGATTACTCGGAGCAGCTGCATGATACGCGCAATCCATTGAAATCGTTTGCAAAGCTGCTTCTAGAATCCAGTCCGGCAGCTGCTTTCAATCCGTCTGGTATAGGAGCTGGCCCTGCTGTAGGTAGCGCCATCCACCATGGAAGTGCAATTCCTCGAGATGCATCAGAGGGCAAGGGTTGCCTTGAGGACCGACGTATCCCAGTGATCATGTCAACTGCTGTCAAGACACTGCTGGACAAAGATGTCATGTCTATTGCCAGCA…
FeCH	Karlodinium	0169088058 Karlodinium micrum CCMP2283	1466	50.4093	nd	lcl|CAMNT_0009148315 /NCGR_SEQ_ID=MMETSP1015-20121227|14555 /TAXON_ID=342587 /ORGANISM="Karlodinium micrum, Strain CCMP2283" /LENGTH=1861	CAAGTGCTCAAGGAAAGATGTATAGCATCGCCTTTCTGCGTGTTCGCAATGCGTGAGGCTTTCTTTGCGCTTATATGCGCACAACTGGCGAATTCAAAGGCTATTGGATGGAGRGAAACATTGGTGCACGATGCTGCTGAAGATATAGATGGCGGCAGGCGATCGGGCCTCGCGAGGATGTTGATCACTCTCAACGCAGGCGTAGGGCGAAGATCTGGCAATCATGCTTCTCTCCAGAGCAGCGCGTTCGGTCGGCATCCTAGTGCAGCACTTGAAGTCGCCAGCACAGGTACATCTGGTTGCAGAACTAATAGCCCTGTATCAACAGCAGCATTAAGTCCCAGTAGAGAAACGGCAGTATTGACACCAACGAACTCCGACCTTGCCCGCGGGACACCA…
FeCH	Lepidodinium-1	comp36906_c0_seq1 Lepidodinium chlorophorum NIES-1868	1398	48.784	nd	comp36906_c0_seq1 Lepidodinium chlorophorum NIES-1868	TCTCAGTCCCATCGGCGGCCGCTTGCACATTGTGTCGACCCGCCTGAGCAATGCGCCTTGAAAGATCACCCATTTCATGT CCGTGGTCGCACTTATCGATGTGGCGAGCTCGCTTGTGGGTGCGGCGATGGCCATCAGCACAACCGTGGGGCAGCATGCG AAGCCGTTTTGCGTGAAAGTGAAAAGGGTTGCGGCTGCGCCAGTCAGCGCTACATCGACGCAGATCGCGCACTCGTGGTT AAAGACGAGAAAGACGCAGGAGGCGAATGGATACCGACGCATAGCCATGGTCGGAGCGTCGGCCGTAATAACGACGGCTG TTGCAATTCGTCGCCAACGTAGACGTGGGAAGTGTCACGTTGCCATGAGATCTGGCCCTCCACCAAATAGTCGAG…
FeCH	Lepidodinium-2	comp20534_c0_seq1 Lepidodinium chlorophorum NIES-1868	1593	49.9058	nd	comp20534_c0_seq1 Lepidodinium chlorophorum NIES-1868	GCGTTGGCTCAAATGCAAGCTGAAACAATTGTGGATTACAGGCGCACTTGTGTAGCCGTTTTATTACTTGTTTTTTTAGATTGTTCTTGTCTCAATTGTTCTAGCAGAAAAGGAGAATGCGCAATGCCATCATAAACATGTCTGTTGTATTTCTTGTGCAGGTTAACTTCAACGATTTGGCAGTAGGTAGCACCTCCAACGCCCACAGCTCCACTACCACGCTGATTAGCAAGTTGGTCGACAAGTTGCTTGGCGTCGCGTATGAGTCGTGGCTTCGTCGCTCCGCAGATCTGGAGGAAACAACGCTCGAGATGCCTGGACATATTGCCATAGCGTGCCACACGAATCTTCTAAGACCTCGCCTGCGACCTTGCGCACTTCCACCATCTGACCAGGGCT…
FeCH	Lepidodinium-3	comp115243_c0_seq1 Lepidodinium chlorophorum NIES-1868	1182	51.3536	nd	comp115243_c0_seq1 Lepidodinium chlorophorum NIES-1868	GCGTTGGTCGGTCGTCGATACTTTTTTGCCCAAGTACGGGCTCCATCCACTTGGAATTCTCCTTCGATGATCATGACTGGTAGAGGATGTCGCCGCTTTCCGAGAAAAGCTTGGCTTCTGCATGCGCTTTGTGCCCTTATTGCCACGCGAATGATCCGCTGGTGCGGATCTCAATTATTTGTACAACAGACCTTCACAGGCATGCCATTTGTACCTCGACGGCAAGTGTTTATGCACAGCAAGTCTGACGCATTGAATGTTAATGATGCGCATGACACAGGTGTCATGATCGCGAACTTAGGAAGCCCAGAGTCTCCAACTGCACCAGCAGTGCGGTCCTTCCTCGCAGAATTCCTGCATGATTATCGGGTTGTGGACATTACTCGTTGGCTTTGGTGC…
FeCH	Lepidodinium-4	comp121137_c0_seq1 Lepidodinium chlorophorum NIES-1868	1500	47.4667	nd	comp121137_c0_seq1 Lepidodinium chlorophorum NIES-1868	GTGTCTTGCTCAAGAGCCTGGCTTTTGAGAAGTTGCTCGGTCCAAAGCATAATGATGTGCAGGTATAGGAGTATTTGTAC ATATCTCTTGAGTTCTATTACGCACGTGCTTCCTGTAACTCTTTTGGTGGAACATGCTTTCGCTTTTGCACCGAGTATGA GGAGGCCCAGTGCACCTGCACGTGCTCTTCCTAAGATAGCCAGAGCTACATCGGTCATGATGCCATCTGTCAAGAGCTCC CCACCATCAGTCAAGGATCATCTTGGTGGCGTTGGCGTGCTCCTTCTGAACCTGGGCGGACCTGAAAAACTTGAGGACGT ACAGCCATTCCTGTATAATCTTTTCGCAGATCCCGAGATCATACGCCTTCCGAGATCATTGTGTTGGCTGCAGAA…

## Sheet: Chla
protein	sequence name used in Fig. 3	contig number or accession number	total basecount of ORF	AT content in ORF(%)	SL	contig number or accession number of nucleotide sequence	full-length nucleotide sequence (sense strand) SL sequences are highlighted in red.
MgCH (ChlD)	Karenia	0173861370 Karenia brevis CCMP2229	1563	49.6481	nd	lcl|CAMNT_0014888701 /NCGR_SEQ_ID=MMETSP0029-20121228|127839 /TAXON_ID=156230 /ORGANISM="Karenia brevis, Strain CCMP2229" /LENGTH=1833	CTGTGCGCCATCCATTCCACCCAGTGCTCATAGCGACTTGCAACCCTGAGGAAGCAGAGCTTCGTAAGCATCTTGTTGAC CGTGTTGGCATATATCTATCAGCAGATGCTGTCCAGTTAAACGAGACGGAGCGGATCGAAGCAGTGACCAGGGTCAGTCA GTTCGCAAAACACCCTCAGGATTTCAATCATGAGTACGCAGTGCAAAAGCAATCTTTGCGGATGTCCATTGGGTATGCAA GGGATTGCCTAAAAGGGTTGAAACTCACTAACGAGCAAATCAAGTACTTGTGCGAATCGGCGATACGTGCGGGCGTTGAG GGCCATCGAGGTGAGATTTTTGCGGCGCAGGTTGCAATTGCCAATGCCGCTTTGAATGGCCGAAAACAGGTGACG…
MgCH (ChlD)	Karlodinium	0169258024 Karlodinium micrum CCMP2283	1455	48.866	nd	lcl|CAMNT_0009339943 /NCGR_SEQ_ID=MMETSP1016-20121227|41197 /TAXON_ID=342587 /ORGANISM="Karlodinium micrum, Strain CCMP2283" /LENGTH=2639	TCGTGCTCCCTCGTATTGCGCCTTCTTCGCTGTTGCGGCGCATAGTCTGGCTTCTTCTTTCCGAGATGACATGTCGAGCA AGTTGGGATTCAGCAGCAACAGCGAGCAGATGCTTCATTCAGGCCCCTTGAATCCACAAGAAGCTCTGAGTACGATGCTA TTGGCGTTGCATCCTGGTTCCAGCAGTAGACCACTATCCCTTCGGCAAAGGCCAAGACCGAAGACAGTAGCGCAAGCTAT CAAAGATGCTGAAGCCCGTCTGAAGGCGATCATGGATGCAGAAGAGGAAGAAAAGAAGACCAAACAAGTCGCTTCGTTCG GCAACATGAACATCGGTGATGGGCCGATACAGTTTCCACTTGCAGCAATCGTTGGTCAGGAGGCAGTGAAGACAG…
MgCH (ChlD)	Lepidodinium	comp120718_c0_seq1 Lepidodinium chlorophorum_NIES-1868	2703	45.542	nd	gnl|LepiRNA|LepiRNA120718_c0_seq1 LepiRNA120718_c0_seq1 [Lepidodinium chlorophorum NIES-1868]	GGCAGGACATGGGATCTTTGGCGCTTGGCTTCTCGCCGCCGCGTTCGTTTTTGTCAATGCTTAGCATCAGTCCTTTCGGT TTTGTCCTCGCATTGCTGACACTGAGGCATGCGGCGAATCACATTGATGTCAGGCAAGACAAATTATTCAGCGGGTTAGT CGGCGAGTTGGTTGACAAGTCCGTCGATATCATGTTTGATAAGGCGTTCGAGAAGTCATTCTTGCACCATGAAGACTTAA ACGAAACCATACTCGGTGTGCCTGGTCTTCACGCAATTTGGCCTTCCAGGAGTCTGATGCCTGGCACAAGCGAACTGATC TCACATGGATGGGTGCGTGTACCTGTAGGTACCGCGAATTGTTTACCTCAACGAGCGAGAGGATACCACAAAAGT…
MgCH (ChlH)	Karenia-1	0173791114 Karenia brevis CCMP2229	4248	45.2684	nd	lcl|CAMNT_0014805311 /NCGR_SEQ_ID=MMETSP0029-20121228|8342 /TAXON_ID=156230 /ORGANISM="Karenia brevis, Strain CCMP2229" /LENGTH=4499	TGCCTTACTTTTAATGGCCTGCGTGGGCCAAGCACGACGCCTGCAACCTCTGAGCGAACCGAACTCTTTAGACACATTGG ACGCATTGGAAGCGTTCGCAGCAGCGTTGCAGACACATGATGCCGAATCTGCCTTTAACCTCTGTGGTCCAGGAGCGCCC TGCCATGTTGGCAAGCCCGCAATTGCTGGCTCGCGCCCAACAGTTTTGAATAGGCAGAGCGGCCTGACAGCAGTCCGTGC GCAGTCGCCTTCAATGGTGGCAGCACCCACCGGCATGTTTACTCAGAGCAATCCAGAGGACCGCCGCGTGAAGCCAGAAA ACCCAGGTGATCGTCCAGTATTCAAAGTGGTCTATGTTGTCCTTGAGGCTCAGTACCAGTCTTCCCTGACTGCCG…
MgCH (ChlH)	Karenia-2	0173923170 Karenia brevis CCMP2229	258	40.3101	nd	lcl|CAMNT_0014956611 /NCGR_SEQ_ID=MMETSP0029-20121228|213937 /TAXON_ID=156230 /ORGANISM="Karenia brevis, Strain CCMP2229" /LENGTH=846	AGAGTTGAACTTTGTGAAGAAGCATGCTGATGCTCTTAGGGCAAAAGGAGCAGAGGAAGGGGCAACGGCACGCATTTTCAGCAACCCCCCAGGGGATTATGGCAGCATGGTTAATGAGCGCGTGGGTGCAGGAAACTGGGAAGGTGCAAAGGAACTTGGGGATACGTGGGCAGCGCGCAATGCATTCAGCTACGGGCGAGGAGGAGAGCGCGGCGCAGCACGGCCAGAGGTGTTGAACGAGCTATTGTCAACGACCGACCGCGTCGTGCAGGAGATTGACAGCGTTGAGTATGGCATGACAGACATCCAAGAGTATTATGCAAACACTGGATCGCTCATTCGAGCAGCCAACACAGCAAAGCAGCAGGCGTACGAGAATGGTGACAAAGTTGCACCGCC…
MgCH (ChlH)	Karlodinium-1	0169181396 Karlodinium micrum CCMP2283	3003	49.9833	nd	lcl|CAMNT_0009256559 /NCGR_SEQ_ID=MMETSP1015-20121227|68677 /TAXON_ID=342587 /ORGANISM="Karlodinium micrum, Strain CCMP2283" /LENGTH=4431	CAATGATTCTCCTGAATTTGAATCCAGCGCTTTCTTCCCGCATTGCGTCAGCCCCTGCAAAACACAAGAGCAAGCTTGCTGTAAATGACAATGACCATCGCCCAGCTGCAACGATCCGCGCGCACTCGCCAGCCATGCAGGGCGCAGGTCTTTATACGCAGAGTAAACCACAAGATCGTTTGGTCAAGCCTGAAAACATCGGCGACCGAACACAGTTCAAAGTGGTTTATGTTGTGCTTGAATCTCAATACCAGTCTTCGCTAACCACCGCTTGCAAGCGTATAAACGCAGGCCAGAAGGATGTTGCAGTCGAATGCTCTGGCTATATCCTTGAAGAGCTGCGAGACCCTGCGAACTATGAGCAGTTCAAGAAAGATGTTGCCGAGGCTAACATTTTCA…
MgCH (ChlH)	Karlodinium-2	0169359022 Karlodinium micrum CCMP2283	2520	48.6508	nd	lcl|CAMNT_0009456133 /NCGR_SEQ_ID=MMETSP1017-20121227|28996 /TAXON_ID=342587 /ORGANISM="Karlodinium micrum, Strain CCMP2283" /LENGTH=4254	AGGGATCGAAACGCTCAGAAGAAGGCAGAATCAAGTTGCGCTACATTCCAGCGGGGACTCGCATGCTGAAGGAAGTGGAT CATTATGCCTCGACGACCAGCCTTCTTCATCGAAGCCTTTTGCAACATTTCTTCTGGCAGTTGCAGTGCCTTCCAGATTA TGTGCTTCGAGTGGACGCAGTGATGCCATTACATATGCCAATCGACGTATCTTTGAAAGATCACCTTGTTTCAGGAATTG CAGCCCTCGTATGAGTCGAATGGGAGAAAGTATCCTAGAAGAGGCTCGAACGCTAGACAGACAAGCTGGTCACACAGTGG ATGGAAAGCGGATCGTTCTCATAACAGGCTTCGAAAGCTTCAACGTGAAATTGTATAAAGACGCCGCTGCGAATA…
MgCH (ChlH)	Lepidodinium	comp96340_c0_seq1 Lepidodinium chlorophorum NIES-1868	4404	49.7956	present	comp96340_c0_seq1	GTAGCAATCCATAGACTTACTTGGCTCAAGCCATTCTTGGCTCAAGTCTCAAATACTTTAAGTCGCTAAGGAGTACGGTAGGCGTCCTGTCGTTCAGTAGATCTTAAAGCCGTGCGCACAAGTAAGTCTATGGATTGCTACAGCTCTCTTGATCATGGCGTGCCAGTGCCTCGGAAGAGGACCCGCTGCAGCTGGGGCCATTTGATTCTCTTGGCCGCTGGAGCGTGTGCTCTGATGCTGTTTCTTGGAATGTCGTTTTCTCCGCGGGTGCAACAAATGGATTCTTTCCAGACCCTAAACCTTGCAGTTCGAGCGGCTGCGCTACAAAGTGCGAAGGGGAAGATGCCAAGCTCGGGGCACCAGCCAGCTCCCTATAGTGCACGTTCCGTGCTACACCAG…
MgPMT	Karenia	0173758408 Karenia brevis CCMP2229	1005	46.3682	nd	lcl|CAMNT_0014770349 /NCGR_SEQ_ID=MMETSP0027-20121228|210506 /TAXON_ID=156230 /ORGANISM="Karenia brevis, Strain CCMP2229" /LENGTH=1351	TTCTTCGTTGGTTGTTTGTCTTAGTCAGCTAGATTTATTTGAAAACTACCCACCATGCGCAAGGTGGCGCTTATGCTGACTTGCTTGGCCTGTGCAGGCCAGAGTCGGCGAGTCTCCAGAGCAGCTGACCACTTGCAGAGCACTCCAGATGCAGAGGGCGAGACAGGTCGGCTGAAGACACTTGCGACACTTTTTATGGCATGGAGCCCAGTCTCGGCGTTCAACCTGCATACCTCAGGAGTCCGCCCTTCCATGGGCAATCCTGCCCATGCTGTTTCAGAACCTGTAGTTCTTGATGGCGAGTTTGCGTATCATCTGCCTCCCTATTTGAAAACTACCCACCATGCGCAAGGTGGCGCTTATGCTGACTTGCTTGGCCTGTGCAGGCCAGAGTCGGCG…
MgPMT	Karlodinium	0169310134 Karlodinium micrum CCMP2283	876	51.5982	nd	lcl|CAMNT_0009403743 /NCGR_SEQ_ID=MMETSP1017-20121227|2801 /TAXON_ID=342587 /ORGANISM="Karlodinium micrum, Strain CCMP2283" /LENGTH=924	CAAGCGTCTCAAGCTCATCAAAAGTTGGCTGTTCAATTTGGTTGCCATGCTGAGACTTGTTGCAGCATGTTGGTGCTTCA GTTGCGCAGTTTTGGGGCGACATTCTGCTGATGACGACACACAGTTGGAACCGCTGGCTGAATTGTTACTTGCGTTTAAT TCGGCGCCCACTTCTAGTAGCCATATAGCAAAAGCGAACACCATGCGTCATCGTGTGGCGCCGGTTGCCGCGGTCGATGA CAAGGCAGAGGTCAAGCAATACTTCAACAATGAAGGTTTCGACCGGTGGTCTCGTATTTACTCTGAAGATGGTGAAGTGA ACGCGGTCCAGATGGATATCCGAGAGGGGCATGCTGAAACCGTCAGCAAAGTTTTACGGTGGATCGACGCAGACG…
MgPMT	Lepidodinium	comp85011_c0_seq1 Lepidodinium chlorophorum NIES-1868	1116	47.9391	present	comp85011_c0_seq1	GTTCCAAAAACACTTCTCGTCATTTATCGGCTCAAGGAGTAAGCGTCCCGAACTTAGCTAGCAGACTTATCGTGAAAAGAAAGGCAAGATATGCGTGGTGCGACTTTGACAATTCTGCTTGTTGCGGCCAGTGCGGACAAACTCGTCGATGAGTTGGTTGCAATATTGGTCGACAGATTCTTCGACAACTTCCCGTTTCTGGATGTTGATCTGAACAGCGCCGCACTCGGGAGTCCCGGCCACAGTGCGAGCCCTCACCGCATAAACTCTGGTCGAGCAGCGTACGGGCCACAGTCGCGGTCGTTGGCGCAACGCAACCTTGTGTTGCCAGCAACAAGGATCGATGTTACAACGAAAGCATTGGGAGGGCTTGAGAATGGAGAGCTGATCGCTGCGGTC…
POR	Karenia-1	0174002120 Karenia brevis CCMP2229	1761	44.4066	nd	lcl|CAMNT_0015049337 /NCGR_SEQ_ID=MMETSP0030-20121228|90837 /TAXON_ID=156230 /ORGANISM="Karenia brevis, Strain CCMP2229" /LENGTH=1993	GAGAAATCAAGTGTTGTTGAGTTGGGGATTACAAGTACATATCTGATATTTCCTTGACCATGCGCATCATTACCCTGCTGTTAGCGTGCTTGGCCGGCGCCGGCTATTGCCGCAGAGTGAAGATGGAGACCAAGGATTTTGGCGACGATCCGATTGAGGTGAGTGATGGTTTGGCAACTCTTCTTCACACGCTCAATCCCGCTTCCGGTTACAACGGACCGCAGCCACCACCGATGGCAAAGGCGCCCTGGGAGAAGCTGGTTGGCCGAGCAGCCGAGGCAGTGGCTGCGGTCTCTGATGCGGTCTCTGTGCGACCTGCGGAGCAGGCATCAAAGTTTGGCAACAAGAAGCTCGCTGTCATCACTGGAACTTCTTCCGGCCTCGGCCGCGCCACAGCAC…
POR	Karenia-2	0173999550 Karenia brevis CCMP2229	1356	45.7227	nd	lcl|CAMNT_0015045687 /NCGR_SEQ_ID=MMETSP0030-20121228|83423 /TAXON_ID=156230 /ORGANISM="Karenia brevis, Strain CCMP2229" /LENGTH=1457	TTTCAAGAGCCTGCATTCTGAGCGAGTTGTCTGCAGAGGCTCTGCCTCACAATCTCTTTGATCATGTGCCCAATAGCACTTCTCCTAGCCTTCTTGGCTTGTGGTAGCCATGCTTTCCGGATGCAAAGGAGGAGTGACCAAAGCAGTCCGTCACAATCACTTCAAGAGCTTCTTCTGGCACTCGACGCCGTGTCAGCCTTCAACCCTTCCAGTCCGGCACTGTCCGCTCGAGCAGGAAAGCGCGCCCTGCCAGTGATGACTGCCACCTTGAAAAGGCCCGGCGTGAGCAAAGAAACAAAGCGGCCGCAAGACGCTCTGGGTCTCAACCGCGGGGCCCAGGAGGCCACCAGCGCAAAGGGCAATGTCAAGATCTACAAAGGAAGAGAGATTCCAACTCCC…
POR	Karlodinium-1	0169102736 Karlodinium micrum CCMP2283	1335	50.6367	nd	lcl|CAMNT_0009163863 /NCGR_SEQ_ID=MMETSP1015-20121227|22329 /TAXON_ID=342587 /ORGANISM="Karlodinium micrum, Strain CCMP2283" /LENGTH=1452	GTTAGACTAGCTGTCAAGTCCAGCTAGTTGGTGTTGTTATCGACTTTAGTTTAGTTGGTTGTTCAGCGAATCTTGATTTCTACGATGCGTGATGTTGTATCTGCACTCTTCAATGCCATCTGCATTGCCTGTACGATAAGATTAACYTCCGCCGATGATGYAGCTGCAGCAGAGTCGCAGTTATTGGGAGCAAGCGGAGGCTCYAAAGCTCTCTCATCACTTCTGTTCAACTTTGGAAAGGTGTCAAAGTTCGGTGACAAAAAACTCGTTGTCGTCACCGGTACTTCGTCTGGATTGGGCCGCAAGACAGCACGCGCACTACTACGCACAGGGAAATACCACGTCGTTGGAGCAGTGCGCGATTTGGACAAGATGGAAGTAGTTGCCGAGTTGGAGGAA…
POR	Karlodinium-2	0169198464 Karlodinium micrum CCMP2283	1323	50.6425	nd	lcl|CAMNT_0009275195 /NCGR_SEQ_ID=MMETSP1016-20121227|8823 /TAXON_ID=342587 /ORGANISM="Karlodinium micrum, Strain CCMP2283" /LENGTH=1512	TCAAGGTCGACTGCTCTGGGTTGGTTGTGTATTTTCTATCATTGCTTGGTCGGCGGGTGGTCGTCGGGATGCCTCTGCTCACATCTCGCATGCTGGGCTTTGCGTGCGTAGTCTTGGGGCTAAGCGTTGATAGAGCTATGGCAGCGCTAAGGCAAGAAAAGGAGAGTCTCGCTACAGTTCTTTTGGCTTTCCGACCGAGAGCACCTCTTCGAAACGCAAAGTCCGCCTCGCCTAGAATGAATGCCGCGGTCGCACTACCCAAGAAGCCAGAAGTGAAAAATGTTATCAAAGGCAACACTCGAGAAGAATCTGTTGGTAAAGAACTCGCCAAGCACTTGAAAGAAAGCGAACGATCGTACCAAGGCAAGGAAATTCCAAAGATCGCTGGTGGCCTAAAGA…
POR	Karlodinium-3	0169076352 Karlodinium micrum CCMP2283	1125	49.6	nd	lcl|CAMNT_0009135809 /NCGR_SEQ_ID=MMETSP1015-20121227|8302 /TAXON_ID=342587 /ORGANISM="Karlodinium micrum, Strain CCMP2283" /LENGTH=1365	CTGTTCGTACTTTACATACTGAGTTTTATTTGCACCGCTGGAGGGCAACGGGTGGATAGATTTAATCCTGAAACACTTCTGTTGGCCCTCCGCCCGCCTCCTCGAAGTTCTCGCACCCATGCGCCCAAAATGAATGTCATACTTGAGACCCCAAGAAGATTACTAGATCTTTTGAAACGTAAACCTTCACCTTCTAGCGAAGAGACTAGCGAACGCTTGTACACGGGATCAGAGTTGCCGAAGGTGATTGGTGGCGTAAAGATCGGTACTCGGAGGATTGTCGTCGTAACGGGTGCATCTTCTGGTCTCGGCTTGGCAGCTACAAAAGCGCTCGTCGACGACGATTACTTCGTGGTTGCTGCTGTTCGCGACCCCAAGAAAATGGACGCAGTGGCCGAG…
POR	Lepidodinium-1	comp29332_c0_seq1 Lepidodinium chlorophorum NIES-1868	1650	47.8182	nd	gnl|LepiRNA|LepiRNA29332_c0_seq1 LepiRNA29332_c0_seq1 [Lepidodinium chlorophorum NIES-1868]	ACGCAGCAGAACAGGCTCAAGGTCCCAAAAGTGGTTCACAGTGTCGTTATGCACGCGGACCCAATGGCGCACATACTCTGTCTTAGCCTTTTCCTCCTTCGGGCGGCGCAGGGCCAGAAGATCCAGAAATCATGGGGGAAGGTCAATGCTCCTGTAGCGGCGGTTACGCAGCAGATCCCCAAACCGAAAATAAAGAGCGAGTCCCCTCTCCTGACAAACTTTTTTAAATTTGGAAAGTCGTCAAAATTCGGTGACAAGAAGCTCGTCGTCATCACTGGTCCGTCATCGGGTCTCGGTAAGGCAACGGCCAAAGCACTTTTGAGGTCCAAGAAGTATCACGTCATCGGCGCGGTCCGCAACCTCGACAAGATGAATGTCGTTGCGGAAGCAGAGGGTTTT…
POR	Lepidodinium-2	comp104830_c0_seq1 Lepidodinium chlorophorum NIES-1868	1542	45.3956	present (SL-PCR)	gnl|LepiRNA|LepiRNA104830_c0_seq1 LepiRNA104830_c0_seq1 [Lepidodinium chlorophorum NIES-1868]	TTTCAAGTCTTAACGCCTTCTCTGTTGTGAGCATAAGAGCCGAGGTAAGACAGAAATGGCAATGTGCAAAACCATGGCGAACATCATTCTGTTATTCGTCGTGTGGGCGCATGGTGCAGAGGAACGTATAGTGAATAGATTGGTGAACACCTTGGTCGGCGACTTGGTCAATCAGTCGATCCGCCATGACGACATAGAAAATGCAACGCTTGGGATGCTGGAGCATCTCGCGAACCCTCTTCGTGCGAGTTTGACCCGTGCAGGTCCAAGAACTTTCACTCAACAGCCACTTCCACATACCACTGTTCGTGAGTGCGCATCGCCGTGGGCTCAGAGCTCGCCGCAGTCTCGCAGGGAAGCAACTAGAATGGCTGCCCGTGCGGGAAGCGCCCATGCAGT…
N-DVR	Karenia	0174088982 Karenia brevis CCMP2229	1194	47.4037	nd	lcl|CAMNT_0015146129 /NCGR_SEQ_ID=MMETSP0030-20121228|221974 /TAXON_ID=156230 /ORGANISM="Karenia brevis, Strain CCMP2229" /LENGTH=1292	TACTTGGCCTGCGTGGGCCAGGGACGACGAGTGCAGACCTCGGATGCGAGAGTGCACGGCAGCAGGAGGCCAATGAGCGT GCTGACCACACTCCTTCTGGCTCGTGATCCGGTGTCTGCATTCCAGCCTGCAAGTCCAGCAACTCGTCAGGTTTTAAACA GGCAGGGCCGCTTTAGACACCGTTCACCTGTCATGGAGTTTGAGTCAGGCGTGACCTGCACCAAGGAGAAGGTAGTGATT GTGGGAGCAACAGGTTACATCGGAAAATCTGTAGTTCGTGAGAGTGTGCGCCGGGGATACGAGACTACTGCAGTTGTGCG TGACAAAGCAAAAGCCCAAGGTGAAGCAAAGTTTGACGGAGCAGCTGTCATCGAAGCTGATGTGACCGACCCAGA…
N-DVR	Karlodinium	0169202308 Karlodinium micrum CCMP2283	1314	51.446	nd	lcl|CAMNT_0009279269 /NCGR_SEQ_ID=MMETSP1016-20121227|10860 /TAXON_ID=342587 /ORGANISM="Karlodinium micrum, Strain CCMP2283" /LENGTH=1379	GTTGGCTGCTCAACTTACAGGAGATTCATGCAGACATGCTCATACATATGAGCCGCATATGCTTTGCGATCGTTGCTCTA TCTTGTGTGTTACATGCACGACGAGTGAAGACCTCATCGGAAAACACATGGTACCAGAGTGAACTGGCACGACATGATCG AGTGGAAGATAGAGTTAATGCAGGCGTACTACACGATCCCGAGCATCCTCTTGCATCAATTCTTTTAGCACACAGTCCTG CTGTATCTTCGAGTTCCGGGAGAAGACTGAAGCCTTTCCCAAATCGCGTTTGGCAACGCACATCACCTGTGAGCATGGAG TTCGAGTCAGGTAAAAGTTGCACTGGTGAGAAAGTGGTAATAGTAGGAGCGACTGGATACATAGGAAAATCTGTT…
N-DVR	Lepidodinium	comp25143_c0_seq1 Lepidodinium chlorophorum NIES-1868	1539	47.4334	nd	gnl|LepiRNA|LepiRNA25143_c0_seq1 LepiRNA25143_c0_seq1 [Lepidodinium chlorophorum NIES-1868]	AGTCATTTTTACCAAATACATCGGTGTAACTAGCAATGAGTGCCAGAGGAGCCCTAAAAGTATGGCTCATCCTCATCTTTTTGCAGCGCCACACACGGGCCGACATCAGCGACGCTGGAATAACTGGAGTACAGCCTGGCACCCTTGCCATTCCCAGAGGCCGTCAGCCAACCAGTCTTAAAAATTACAGATGGGAACAGCATTTTGCGAGCCGCACCAGAGCAGCAAGAGAACATCATGACGCACGAAAACATCAATGGCTGTCCAACATGCCGAAGGCGAGATTGGCAGCGGCGGGTAGCCAGCAAGAAAGAATCGCGGCCATAAAAGCAGTTTCGTCTGATGGTTTGTCGACTGCGGATCGTTCTGTTTCTACACCAGGCAAGCGGGTAGTGATAT…
F-DVR	Karenia	0173927754 Karenia brevis CCMP2229	741	45.8839	nd	lcl|CAMNT_0014961213 /NCGR_SEQ_ID=MMETSP0029-20121228|216237 /TAXON_ID=156230 /ORGANISM="Karenia brevis, Strain CCMP2229" /LENGTH=1604	CCTGACTTTTGTGGGCCAGGACCTCGATCCAGCCGTTGCATACAATCCTGTGAATCCTAGAGCACATTCTCAGGCCAAAGTTTTCCTCCGGAGACGAGATCGCCTTGGTCATTGCAGTCCCATTCTCATGGGCCCACTTGAGCCAATCACTGGGCCATGGCCGGATGCCTTTCCAGCCAAGGACTTGTGCTCCAACTGTGGTTTGTGCCGCACATCAACTGGTTTGAAGCATGTGGCAAGCGCATGTGCTTTCATCGGTGAAGGGATGAGCCGTGCCGAGACTCTCGAACCTAAGGTTCATGGTCGCACTCGCTCGTACTCGCCGGATGACCTTAGTGAGGCCTACTTTGGTGTGCACGACAGAATCCTCCTTGCACGTGGCAACATTGGCGATGCCCA…
F-DVR	Lepidodinium	comp137209_c0_seq1 Lepidodinium chlorophorum NIES-1868	1617	50.2165	nd	gnl|LepiRNA|LepiRNA137209_c0_seq1 LepiRNA137209_c0_seq1 [Lepidodinium chlorophorum NIES-1868]	ACATAGATTGATAAAGTCTATAGTTTGCTAGCGGAGTGGAGAGCAAGAGGGACCAAGCCAATGTTTGATCGGAACATTGGTCTCGCCGAACCTTTATTAATCGAAGCACGTCTCCCGAGCAGTTGGTGCTGTGCGAAAATTTGCATCCTGCTTTTTCTGTGCAGTATCTTGCAGTTTCTGGACTTGTCGGTCTTGTTACCATACAGCAGTCACGGTTTGAGTCACGACCTTGCTGCCCAAGGTCCCGCAATTATCACAGCGAGCCGCATCCAATCGCTTCCAGCCACTTTCAAATACTGGCTCCACCCCAGGTGGGGTGTAGAGCGCGGTCCGCCCTGGAGCAGTTCAGTGAAGGTGTCTGCATATGATTGGCGCGAGAACGCGAAGCCCATCAAGGAA…
CS	Karenia	0114784834 Karenia brevis Wilson	1281	45.8236	nd	lcl|CAMNT_0002092429 /NCGR_SEQ_ID=MMETSP0201-20121206|47236 /TAXON_ID=156230 /ORGANISM="Karenia brevis, Strain Wilson" /LENGTH=1300	TAATTCCATAGCGTTGCCATGCACAAGATCGTCCTTGTGTTGGCCTCCTTGGCCTGCGCTGGTCATGGACGGCGCGTGAA GCTCTCAACAGAGAGCCAGGACCCGTCGAAGGTGGCTCAGCCCAACAGAATAGCGAACGCCAAAAGTACGGGCAAGCAAT CGAGCGCTCTTGCAGCACTTCTTCTGGCAAGCAATCCGACAGCAGGATTTAAGAGTCTTGGCTCAGCAGGGCGTCTGGCT GTTGGCAGTCCCACCCTTTCCAGGTTGCGTCCAGCAGTCTCCCCACTCATGCAAACAGAACCGAAAGCAGCGGAGACTAA CAAGGAGGCGACGGATGGCAGCGGTGGTGTTCGGCAGTTGCTTGGTCTCAAGGGTGCTTCCCAGGCTGACAAAGA…
CS	Karlodinium	0169097534 Karlodinium micrum CCMP2283	1137	48.4609	nd	lcl|CAMNT_0009158345 /NCGR_SEQ_ID=MMETSP1015-20121227|19570 /TAXON_ID=342587 /ORGANISM="Karlodinium micrum, Strain CCMP2283" /LENGTH=1546	GTTTTTAAAAGACGCAAGCGTTGGTTGTGAGTGCTAGTTTTTTGATAACCGTAAATTAAAGATGTGGATGCTTACAATAG CCTTGGCGCACTTGCTCTGCTTGGGTTTGGGGCGCAGAGTGTATATGGAAAGCAGCCCCGACATGGGTAATGTGAAGCCA AGATCCGAGCCCATGTCATTGCAAACAACAGAACGAGCTGATGCAGTGAACTCGCTCGCGTCACTTGTCTTAGCAATGAG CCCAACATGTGTGGAAGAGGCTGTCCGCATGCCTCACCATCACAACGGCTTCGTGCTTCCCGGCGTACGCCTCTTATGAA AGACAATCCAACAGAACCGAAAGCAGCAGAAACGAACGCAGAGGCGACGGATGGCAGTGCTGGCATTCGGCAGCT…
CS	Lepidodinium-1	comp198554_c0_seq1 Lepidodinium chlorophorum NIES-1868	906	43.7086	nd	gnl|LepiRNA|LepiRNA198554_c0_seq1 LepiRNA198554_c0_seq1 [Lepidodinium chlorophorum NIES-1868]	ATTGACGCATCTTTGCGCCAGAAGCTCGGCATTAAACTAGATAGTGCGGCACGGACGGAGAACATTTGGAAGATTCGCTT ACAGCTCATGAAGCCAGTGACCTGGGTGCCGCTGATCTGGGGAGTGATGTGCGGGGCTGCGGCTTCAGGCAACTACCATG CGATCTGGTCAGGCGCGACCATCCAGGTGTGCCTTGAGGATCTTGGCAAGAGTGTCGGCTGCATGGTGCTAGCTGGACCG CTCCTGACGGGCTACACCCAGACGATCAACGATTGGTACGATCGCGACATTGACGCAATCAACGAGCCATACCGACCGAT CCCCTCGGGTGCCATCAAAGAAAGTGAAGTCATCACGCAGCTCTGGGCGCTGCTGCTTGGTGGCCTCGGTCTGGC…
CS	Lepidodinium-2	comp104395_c0_seq1 Lepidodinium chlorophorum NIES-1868	1764	44.1043	nd	gnl|LepiRNA|LepiRNA104395_c0_seq1 LepiRNA104395_c0_seq1 [Lepidodinium chlorophorum NIES-1868]	ATTGCTGTAGTAGAAGCATTGCCAAACCTTTGAATCAAGATGGACGCTTCGAAATCAGCCTAGATTGTTTGCACTCCGCA ACTGGGGTCTGACGCCTTTGTGCAGCCTCTCGAATAATTCGAAAATAAGCTATGCGTGGCGTCACGTTGTTGACTGTAGT TTGTTCGATTGTGCATACTGGTGCTGAAGGACCAACGTATGAGTCCGGCGGCAACTTATTCGACCCTTTCAAGGACCGAA AGATCAAGGCATCGCCTGCTCGTGGTGCAGACCTGGATAACACAACGCTCGGGAAGTCTTCCCCGCTTGCAGCGTCAAGT TCCCACGTTTCCGCCGATGTCGCGGCACTGCGTCCGCAAGTGGCACTGGTTCGACCTTTTCGCGCATCGCCCCGT…

## Sheet: IPP
protein	sequence name used in Fig. 4	contig number or accession number	total basecount of ORF	AT content in ORF(%)	SL	contig number or accession number of nucleotide sequence	full-length nucleotide sequence (sense strand) SL sequences are highlighted in red.
DXS	Karenia	0178117440 Karenia brevis Wilson	2460	45.7724	nd	lcl|CAMNT_0019689235 /NCGR_SEQ_ID=MMETSP0648_2-20121207|20292 /TAXON_ID=156230 /ORGANISM="Karenia brevis, Strain Wilson" /LENGTH=2555	TTAGTACACCCGTGTCAACGAGATTGAAAATGTACAAGATCTCGTTGCTGTTGGCTTGCTTGGCCTGCGCGGGCCAGGGGCGGCGAGTGCAGAGCTCGCAGGGCGGCAGCACTCCCTGTTCGGAGTCAACCGCAGGACTTGCAACTCTTCTTCGGAATATCACCGCGACATCTGCGTTCAAGGGCTCGGGTCCAGCAGCACGCTCTTCAGCAGACAATCCTACTCTTGCCGCTAGGCGTCCAGTTGCACCAAATCGATTGGATCGCCGCGTCCCAGCGATCAGCATGGGCCCTGAAGATGGGGAAAAGGCGAAAATCTCTGGCACCTTTCCACCGCGCGCCACGCCACTGCTCGACTCTCTGAACGACGATGGCCCTCAGAAAATGCGAAGTATGGACG…
DXS	Karlodinium	0169082592 Karlodinium micrum CCMP2283	2124	50.4708	nd	lcl|CAMNT_0009142459 /NCGR_SEQ_ID=MMETSP1015-20121227|11627 /TAXON_ID=342587 /ORGANISM="Karlodinium micrum, Strain CCMP2283" /LENGTH=2254	TGGGTATGGCCGTCGGCATCAGACCAGAATCGGTCAGCAAGATCAGGAGGAGTCCAGGTCAAAAGGGAGTGCACATCCAT TGCAAACTCTTTCCACTTTGATGCTTATCTCACGTGGTTTTCCTACACAACGGCGAATCCAAAGTAGAGTTTCCAGTCGT CCTCAAGTCGCAATGGAATTCGATGCTGGCCCTCGCACTACACCGTTGTTGGATCAGGTGACGTATCCGCAAGACCTTCG ATCTTTCTCTATAAATGAGCTGAAGCAATTGTCGAACGAACTTCGTTGGGACACGATCAGGTCAGTGTCGCAGACAGGCG GCCATCTCGGCTCATCTTTAGGCGTGGTTGAACTCACCGTCGCGTTGCATCACGTCTTCAATACACCAGACGATC…
DXS	Lepidodinium-1	comp18684_c0_seq1 Lepidodinium chlorophorum NIES-1868	2511	46.5552	nd	comp18684_c0_seq1	CTTGGTCAATCAACAGTTGCACTATTTGTTTGTGCCGCCGACTTGACAAGATGGCGTGCAACGAAGCTTCGGACTGCAAGAGGCCTCCTCGCCAACATAGCCGAGCCCTTGTATTAGCAGCCGGTTGTGGTTGCAGTGCAGGCGCGATAGGGCTTTGGTCCCGATGCGGCCAACAAGTTCAACAAGCGCAGCATCGTGCTTTTCTGTCACCAAACGCGAGATTACAAAGCAGACATACTGGTGAAGTTCAGCAGAGGGCTATTCCAGCGCAAAGTGGTGGACATAGAGCTTCTCCTTCCAGTGACAGCCGACTCGCTACGTTCATTGCAAATGGCGCAGTCGCGGCCACTGCTGCCATGTTTGCGATCCGCAGCAGAAGATTTTCTCGGCGACATATTC…
DXS	Lepidodinium-2	comp57335_c0_seq1 Lepidodinium chlorophorum NIES-1868	2433	47.9244	nd	comp57335_c0_seq1	AGGTTGATATTGGCCCAGCAGCTATCACAGGCACTCTTTTCGGGCGTTCCTTCCATACAATTTTGCGCTTGAAGGTTCCT TCAGGCAAGAAGCATAGGGTCATGCGCAGCGCCGTTCTTGCTGTGCTCCTTCTCGTTGTGAAGGATTTTGCAGTTGGCAA CGTGCTGGATGCCAAACACGTATTAGTCGACAGATTGATGGACAGGCTTTTTGACCAAGGACTCGAGGCGTGGCCTCTCC ATTTCACAGAATTATACAATACATCCCTTGCACGCCTCGGAGTATCTTCTTCCGTCCTTCAGCATCGGTTGGCTATTGGC GCCACGGGGGTGACGCACAGCAGCAAAGCTTCCATGGAATCTTTGCGCTGTCCACCCATGCGCGCCACCTCTTTG…
DXR	Karenia	0114735228 Karenia brevis Wilson	1608	47.1393	nd	lcl|CAMNT_0002037631 /NCGR_SEQ_ID=MMETSP0201-20121206|19837 /TAXON_ID=156230 /ORGANISM="Karenia brevis, Strain Wilson" /LENGTH=1736	ATCGCATGTCATGCTCTCAGTGGGTTGCTTAATCTAGCCATGCCATCAGCCATGCGTAAGATTGCTCTCCTCTTGGGCTGTCTGGCCTGTGCGGGCCACGGAAAGCGAGTGCAGACTCCCGGGAGCAAATTGCAGAGCGCTCTGCGCGCAGAGGGCCAGGAGCCCTTGGAAAAGCTCGCGTCGCTTCTCCAGAGCTTCGACTCACAAGCAGCGTTCGCACTTACCGGTTCGCGTCATCCCTTGGGCAGTGCAGCCTCTCTGAGCAATTCACCGGTGGCGTCCCTGAATGCTGGAGGTCGTGTTGGCCCAAATGTCCTCTTCATGAGTGCGAGCGAAGGATCAAGCTGGGCAAAGGGACGCAATCTGGTCGGAACAAATACTGCTGAGCGCTCCAATGTG…
DXR	Karlodinium	0169122770 Karlodinium micrum CCMP2283	1596	50.6266	nd	lcl|CAMNT_0009186027 /NCGR_SEQ_ID=MMETSP1015-20121227|33411 /TAXON_ID=342587 /ORGANISM="Karlodinium micrum, Strain CCMP2283" /LENGTH=1886	CAAGCGTTTAAATATTTTAGGTTGGTTGCTAGATACTGTCAGATACATCCTCTCCTTACCACCAGCAATGCGCAAGCTCAGAACAACTTTGCTGATGTGCATAGGTTGCACAGGAAACAGTTTTAACATGCAGGGGTTACCTGAATCGAATGTTTTGACTCAGCGTGGCACAGATAGAGACCGCAGCGTAAGTGTTCCCTTAAAGTCGCTTGCAGAAGTTCTCTTGGCAGTTGCATCCAACTTTCCTGCCCACCGACTGCGAACCGAGGGGAAGTCTTCGAGTTTGGTCGGACGTCATCATGTGCAATTGCTCAGAGCAGGCTGCAATGGTGTGGCAATGACTGCATCTCCAGAGTCAAGCTGGGCGAAAGGCCGCAACCTAGTGGGAACAAACACCGC…
DXR	Lepidodinium-1	comp117701_c0_seq1 Lepidodinium chlorophorum NIES-1868	1686	46.7972	present	comp117701_c0_seq1	ACACCTCAAGTCAACCATTTTTGTTCAAAATTCTTTAAATTAGAAGAGCTTTTCGATTCTGCCGAGCACTAGAACCAACCCGCAGTAGTGTCCTTAGGATGGCCGATGACCACATGTATTATCAGATTGCCTCCGGTGTAGGCGTTGATTTTCAGCCCGCTTCTGTAAGGCGCAGGTTTCCGCTTGGCGCCGCATTGTTGTTTGGATTTTCTGTCGCACTCGTGTGTGTCCTGGCCATCGTGTCAAGACCCATGGAGCACAGATCCACTGCAGCCGCGTCGACAAGACTTGTTGATTCGCCTCTTGTCTCGAAGATGACCAAGCTTAGCGGTAAGCCTCAGCTAGGAATGACAGCGTCGCTAACGTCAGGCCGCAGTGTGGCGCCTGGAGCATCTTGGC…
DXR	Lepidodinium-2	comp116845_c0_seq1 Lepidodinium chlorophorum NIES-1868	1611	43.2651	nd	comp116845_c0_seq1	TGGTGCCGCATTTTCGTTGGCCGAAGTGGATTTGCTCGATCGCGCGCCCCACCTTTGTTCGAGGATAGCTTTGGAAAACAGGGTGACCATGGAACTTGCGTCGCTGTCGACTGCACGGCTTGGTGCCGCATTTTCGTTGGCCGGCGCAAGGGACGGTAAGGCCGTCGTCCGCACAAATGCATTGGCTGGGGCGACACACATGGGGCGACCAAGTCTAAAGGCTCGGGTTGCAGCACCAGACGACACGCACCGACAGGCGTTGGCCACATGTTCACTCTTCTCCTCCTCTGGCGGAGCCGCGTTGCTTGCCATGGTCGCTGGCGCCGCCGCAGGGAGCAGGAGCAAGGCTCGGGGTGGTAAGAGACGGGCCATTTCGTTGCAGGCAGAGGGTTCCAGTTG…
IspD	Karenia	0174195266 Karenia brevis CCMP2229	948	48.3122	nd	lcl|CAMNT_0015271305 /NCGR_SEQ_ID=MMETSP0031-20130131|182137 /TAXON_ID=156230 /ORGANISM="Karenia brevis, Strain CCMP2229" /LENGTH=971	CCTTCTAAAATTTATCAGTTGCAATGTGCAAGATTGCACTTCTGTTGGCTTCCCTGGTCTGCGTGGGCCATGGACGGGCGCAGAGCTCATCTGGACGTTTTCACTTCAAACCGGCTGCAGAAAGCAAGAAGTCACTGAGATTGCTAAATTCCGTTCGCACTTCGCATTCGTTTACTGGGTCCACAAAGTCACGAGATCACGAAAGCGTCAATACTGTATTGAATCCGTTAAAAGTAGTTTCTATGTTTTTTCTAGCGCTGAAGCCACCAGCATTCAACCCCTCTGGTGTAGTGATGCCTTGGACCCGGAGCACCACCTCTTCTGGTCTGAACCCACGTGCTTTGAGTAGTTCCATCAAATCCTTGAACAGTAAGCTGGAGCTTGGAGCCAGAGCAAGAA…
IspD	Karlodinium	0169274054 Karlodinium micrum CCMP2283	195	55.8974	nd	lcl|CAMNT_0009360531 /NCGR_SEQ_ID=MMETSP1016-20121227|51491 /TAXON_ID=342587 /ORGANISM="Karlodinium micrum, Strain CCMP2283" /LENGTH=549	CAAAGAAATAGCCTTAAGATCTCTTGACGTGTTCTTGGAATTGGGCCCCAAAGAAATCGTTATAGTTTGCGCGGAAGAGTGGCGGAACTTGTTTGAGGCTTATCTACAGTCTCGCTCGGAAGTACGTTCAGAAATCAAGTTCGCGCTCGGAGGAGCAGAGCGACAGAATTCTGTCGAGAACGGGGTCGCAGAGTTGAGCACAAAATATGCAGTTATCCATGATTCTGCACGTCCGCTAGTGACACCAGCTGAAGTTTGCAAGGTTATTGCCGATGCCAGGTTGCATGATGCTGCTCTGTTGGCTGTGCCGACCAAGGCGACAATCAAGCAAGCAGTGTCAGGCGATGAGAATATGGTCGATATGACTCCAAACAGAGATTTGCTTTGGGAAGCTCATAC…
IspD	Lepidodinium-1	comp105386_c0_seq1 Lepidodinium chlorophorum NIES-1868	1098	49.3625	nd	comp105386_c0_seq1	CGTGGTGGAGGGCTCAAGGCGTAGTGGATTGAATCTGAGACGGTTCCCTTCTGGAAATGGCTTGCTTCAACGTGCTCATC TGGCGTAATTTGATTGTTTCGGCGTACACTGCGGAGCTGGCGACAAATCGTGGTGGCGACGGGCAGCCTCCAGGCTTCCA CTACGCAGATCTGGATGGCACAACGCTCGGGAAGCATGGCCACATAGTCGTGTCTCCACGAGGTTTACCCCACGCTCCGT CACCCGTTTATCCAGACTCCAGCCACTTGCCTTTCTTGTTTCTTCGTCCAACTGTAAGCCCACAGCAGATCCTTGGTGAC GTTGCACCCGCGCAAACAGATTACCCTTCGCATGCCCACGGAAAGACGATGCAAAGCCGTGAGGTACAGGTGATG…
IspD	Lepidodinium-2	comp140699_c0_seq1 Lepidodinium chlorophorum NIES-1868	1092	46.2454	nd	comp140699_c0_seq1	GTCGAATTACAGGCCAAAGTGACCGTTTCGCCCAAGCCATGTAAACTCAATAACACTACGCTCACAGTTGCAGTTGCGAG CTATTGACTGAATCTTTGACACTCTTGGTCAAGCTGTCGTACTCATGTCACGTAACGCTTTGCGTTTCGGTGCTACCAGG CACGGTGGGCGACGCTTATCGGCAGCTTCAAAAATCAAAGGAGCGTTCGTCGCCATCTTGTTAGCATTTGTGAGCAGACT GCGGATCATCCCACCCTTGAGCTTTGCTGCGTCCAGCGCGCCTTCGCTATTGCACAAGACCAGGTGGGACCAGGCTGTGA AAGTTTGCGGATTTCATGGGAAACCAGGCTCTGGATGTATGGCGGGAGCATCTTCGAGCGCCACGATTGCATTTG…
IspE	Karenia-1	comp89287_c0_seq1 Karenia brevis	606	45.3795	nd	comp89287_c0_seq1 len=1055 path=[1:0-1054]	GCACTTGTTGTTTTGGTTGCATACTTGGCTTGTCCTGCCCAAGGTGCTGGATTTGAAGACTTACAGTCAAACAGGCGAGGTGAAATACCAAAGTCGTTAAAAACGCTGATAAAGTTCCTTCTGGGATCCAGTAAGACGACAGCTGGATGGCAACTTTCTGGGCAAGGTTGCCGTCATATCGCGCACGATCTGAGAAGGCCAGGCGCGGGCCTAAAATTTTGCGTCACGTCCAGTGGGCTGGACAAGGTGCCATACTCTGAGGTGTATGGAGACACTCCACCAGCTTTATCGCTGAGCGCTCCATGCAAAATTAATCTCTTCCTCCGCATTCTTGGCAAGCGCCCGGACAACTTCCACGAGCTCGCCTCTCTTTTTCAAACAGTCTCGCTTGCTGATACC…
IspE	Karenia-2	comp129272_c1_seq1 Karenia brevis	1254	42.185	nd	comp129272_c1_seq1 len=1719 path=[2839:0-328 3168:329-342 3182:343-415 3255:416-1718]	CACAGCGGCACGAGTAAAGGATGCAGCTTCAAGTTCGGCCCCTGCTCGGCCCGTACGAGC TAGCACGCCGAAGGACGGTGTGGGCAGGCTTCTGCCTCTCTTTGAAAAGAGAGCTCAGAC AGCCAACGCCGGAGCAGAATCGAACAGTGTGCCAGCTCTGAAGAGCCCCAGCGCGCCGGA CTCTCCGGAGGTCGCCGGCAACGACGCTCCTCTCGCCCGAGCCGCCGCCGCAGCAGAAGT GCAGCGTCCGCGGACTGCGCGCAGGAATGGTGGCCCAGCCTCTGCGCGCCACGGCATGTC GGAGCGTTGTCGGCCTTCCACAGCTGGGCGTCGCACTTGTCCAGCAGGCGCGCATGGAGC TTCCGCACCAGCTCCTGGTACTGTGGCGGGTGC…
IspE	Karlodinium	comp176232_c0_seq1 Karlodinium micrum	1155	51.6883	nd	comp176232_c0_seq1 len=1228 path=[1206:0-1227]	CTCAAGGTAGCCTTATCTCAAGCATTGACGGTACCATTGTTTCTGTGCATGTTGAATCATTAATGGCAACGTCAGTTTGGCGCAGCTGGATGTTGGTAGCCTTGGTGAGCATGCTTTCCATTGCACATACTTTTGTTCCACCAATTAATCATGGGCTACGAGTGGAGACAAGCTCGCACATGAGGCTAGGTCAGCTCTTGTTAGCAACAAGCAGAGTTTCGCCGTATGTTGAAAGAAACTTACAGAGACAGGTAACTCGTGGCGCAAATCGCGTGACGAAAGTCACAAGTGGGGCAACTGACATTGCAGAGGGAAGGTCCTTACACTTATTTTCACCAGCAAAGGTTAATCTGTTCTTGCGTATTATCCGTAGAAGAGATGACGGTTACCATGACTTGG…
IspE	Lepidodinium-1	CCC15094 Lepidodinium chlorophorum	807	40.8922	present	FR874012	TCCGTAGCCATTTTGGCTCAAGCTCAAGTCCATCCTCACGCTTTGCACAGCCACGTCAATCTTCGCCATGTGTTGCGCTACAGCCCCGCGCCGCGCCTCGGCGGTTGCGGCGACCGCGACAGCGGCAGCTCTTGCCCTTGCAGCGTCAAGTGCGACAACGTTCGCGGCTTTTCGTTCGGTCCATGCGGCGCCGGAAACGTTGGGCGGTACATCCCCCTCCAAGAGACCAATTGTCTCGGCAGCTAGGGAGGGCGCTCGGACAACGTGCAGACGCTGGGGACCCAGAGGCTTCTTGGCCATGCTGGGTCTTGTTGCCGCACAGCGCCGTAGGCCGCGAAAGTGCAGAATGCGGCATGGCAATCGTCTGCGACACCAGTCTTTGGTGGAGCGTGCAGCTGA…
IspE	Lepidodinium-2	comp47335_c0_seq1 Lepidodinium chlorophorum NIES-1868	1308	48.1651	present	comp47335_c0_seq1	AGTTTGGGTCAAGCTTCTTACTTGTCGAGTCTAGGGGATCATGCGTAGCATCACACGTGTCGTCTTGCTTGCTCTATTTGTGTGGGGATGTGCGAAAGAGGGCATCGTAGACAAGATGGTCGACAAAATGCTCGACAAAATGGTGCGAAGCTTTTTCGACGCGGCGCTTGGTGCAATGCCAATTCCCCAGGCGTACGTCAATCACGAGAAGCGCATAGCCCTTGCAACACGCCTCGTAAATCATGGAGGTCTTCCACCTCGCGCCCAAGCACCACTTCGCGTCGATCAACGTTCCATTCACGTTGGCGTTGCATCGCCGTGGTCCAGCCACACTTCGCCGTTAGGGACGCGTGTGATGTCAGGTCGCGACAACAGACTGGAAGCCGTTGAAGGTACGGC…
IspF	Karenia-1	0173950708 Karenia brevis CCMP2229	828	44.0821	nd	lcl|CAMNT_0014987245 /NCGR_SEQ_ID=MMETSP0030-20121228|11575 /TAXON_ID=156230 /ORGANISM="Karenia brevis, Strain CCMP2229" /LENGTH=853	TCTAGCCCACTCGCCATGCATGTAATTACTGTTATGTTGGCCGCTTTGGCTTGCGAGAGCCATGCACGAAGAATGCACACAACCCGTGATGCACGATTGCAGTCACACCGGGCAGCAGCCTTAGCCCATCCAGCGCATAGACTTGCGGGTCTTCTGCTGGCGCTGGATCCAGCAGCTGGATGGCATATCTTCGGCTTAGGGCACGGCCGTGGCAAAGCGCCCTTCCCGAGCTACTGCTCGCAGAGACAAGGCGTCTCGCGCTGCAGGCAGATCCATGCACTTGCAACTGCTCCAGAGCCTGCCATGCGCATTGGTCACGGCTATGACATCCACCGAATGGCATCGCGGGATGAGGCCGGACAGCCTGTTGTGATCAGCGGGGTATTGTTTGATGGGAGT…
IspF	Karenia-2	0114855984 Karenia brevis Wilson	750	47.6	nd	lcl|CAMNT_0002178715 /NCGR_SEQ_ID=MMETSP0202-20121206|1063 /TAXON_ID=156230 /ORGANISM="Karenia brevis, Strain Wilson" /LENGTH=756	TGGCAATGATTACATGGCTGGCAGGAAGGTACTGGTGGACCTCAGAGCGGGCTTCAAACGCAAGCCCGCTTCTCTGGACTGGACCGCAGAGGCAACTCACTGGAACCAGGCATAGAAGTGGACATTGCTGCTTCTTGGAAGGCCCTTCCTCACAACCTTGCAGGCAAATTAGAAAGATATCAACGAATTCAAAGAATTACGATGAATCTGAGTGGATTGCTGAGCCATCGGTTCGCATTGGCCATGGATTTGATATTCACCGCATGGCGCCGCTTGACGATCCGGAAGTTGGTGGTCCTGTTATAATTGGAGGTGTGCTCTTTGACAAATTCGAACGCGGAATTGTCGCACATTCAGATGGTGACATTGTTTACCATGCAGTTGTTGATGCAATTTTTG…
IspF	Karlodinium	0169223484 Karlodinium micrum CCMP2283	927	50.7012	nd	lcl|CAMNT_0009301829 /NCGR_SEQ_ID=MMETSP1016-20121227|22140 /TAXON_ID=342587 /ORGANISM="Karlodinium micrum, Strain CCMP2283" /LENGTH=1122	GTTCCACTTTGTATGCGATGTTGAAGATTACTTTCGTGATTTTTTGCTTAGCTTGTAATTGCCATGGCCGCAACGCACCAGCCTCCTTTGGTGGGGGGCATTGGCATCCTTCTCAACAGGTTTCAACGCGACTGAATAATATCGATGGTGTTCTAGGTTCCAAGACAGTCATGCTATCAGATTCTGCATTTATGCCGCGTGGACTGGATTCTCTTTCATCGCTTCTTTTGGCACTTAGGCCAATGGCAACATTCACTGGCAATAGTGATGGGCACGTAGATTCCCGAAGACCTTTCAGTGCGCCACTCGAAGCTGGGATTCGGCGTCTTAGATATCGCGATGCGGTGTCCAGTGCAGAAGCCACTGGTGAGGATCAAGATTCGTTGAATTGGGATGCCG…
IspF	Lepidodinium-1	comp109737_c0_seq1 Lepidodinium chlorophorum NIES-1868	1002	49.7006	nd	comp109737_c0_seq1	AGCCACTTGGCTAAATCTATTACCGCTCAAGACCAAGTCTTCGAATCCAGGTGCAGGAAAGATCCATCGCACTTTGATCT GCATGGCTTCCACTGATATGCTTGGATATGTGCAGGTTCGCGACGAACTTACTGGCAACACTTCTCGTACTCGAAGACAA GCTCTCTCTATTGGCTTGGCTGTCTTAGTCATTAGTCTCATGGTCGTCTGGAACGGCATTGCGCCATGGGCCTTGTTATC GCTATCTGTATCATGCCAGCCTCGGGTGCAGATAGCGCGTGCGTATCGGTCTGGTATCGACACTCTCGCTGTATGGCCAT CCATGCAGCAACGCGCTAGTGGTGAAAGCATCCAGAGGCCCGGCTTCCACTTCACAAAAAGTCAATCCGTTCAGG…
IspF	Lepidodinium-2	comp84031_c0_seq1 Lepidodinium chlorophorum NIES-1868	858	42.1911	nd	comp84031_c0_seq1	GCCAGAGCCGTCAAAGTGCCAATCGGATCCAGTCGGTGGCGGTTTACGCCCATGTTTGACAGCACGGCATTTCTTGCTGCGAGCCGAGATGGCTTGGCATCGCCCAGGCTGAGGCTGGCTCCCGAAGTGGGGCTGAGACCTGTGATCGAAGGAGCCAGCTTGGCGCACACTTACGATGCAATCGGCTTCCTCCAAGTGTCAATGCTGCTCGGCGTCTGCGGACTGGCACGTGCGGTGAAGCGGCGCCGTGATCCCAGGTTTGGTGCCGCGCGAACGTTGGCCAGGGCACAGGAGTTGCGAGTCGGAGACCTGGGGGAAGATGCAGGCGAGTCTTTTTTTCCGACGACGTCTGAGCAGACCGTCGAGGCTAATGGCGAAGTACTGCCCTCTGACCCATTG…
IspG	Karenia	0173636972 Karenia brevis CCMP2229	2349	44.6999	nd	lcl|CAMNT_0014629349 /NCGR_SEQ_ID=MMETSP0027-20121228|7662 /TAXON_ID=156230 /ORGANISM="Karenia brevis, Strain CCMP2229" /LENGTH=2409	GATGTCCACCCGCACCATTAGTGCTTTTATGCTATCCGGCGGAGATGCAGCCAAAGCCAACAAGCCAGTGCTGGACAGACCTGGGTATCACTTGCGTTCCAGCGTTCCGGTGGCCGCAGCTGCCCGCCCCTCTGCTGCTGGCAGCAGCACCTTGGGAAGCGGAGCTGCTAGAGCTCTGGTTGCCGGAGCACTGGCCACTCTGTGGGCCCAGCTGGTTCGAGGGCAGAGACGCCGTAGTGGTCCTTCTAGCCGTTCAAGCAATTGTCGGGTAGCAGTAGCACGCTCCGCCATCCCAGCAGGTGGCTACTGTGAGACCGTAGAGACGTGCACCAGGCGGAAGACAAGGAGTGTCAACGTCGGTGGCCTGCTGATTGGTTCGGAGCACCCAATTGCCACGCA…
IspG	Karlodinium	0169104574 Karlodinium micrum CCMP2283	2361	49.767	nd	lcl|CAMNT_0009165869 /NCGR_SEQ_ID=MMETSP1015-20121227|23332 /TAXON_ID=342587 /ORGANISM="Karlodinium micrum, Strain CCMP2283" /LENGTH=2591	CAAGAGCACACAAATAGCATTTCCAGTTGGTTGCTCAGAATTTTATAAATCGTGAGGCATTTTTTTGGCATCACTGACCATGTCGAGTCGTAAGCTTATCTTAATGTTCCTGGTCTTAGCAAAAACGCATTTCGCGGGCAGACTGTGGAGAGACCAGGAGAGTAATGCTGCTTCAGAAAGTGCAGGCGCGTCCAAAGTGCTCGCGTCGTTGCTATTGGGACGCATTCCTACAGTCAACTCGCAATCTTCCATGGCAAGACTGCCTGCAATGAGGACGACGAGGCAGATGATGAGGCCTAGTCTGAGTGCACCTTGCTCAAGGCCTTACAGACAAGGGCGTAGATCCCCTTCAGCCGCAATGCAAGAAAGAGCTTCTTCAGCGTCGATGGAAGTTTCCAG…
IspG	Lepidodinium-1	comp95833_c0_seq1 Lepidodinium chlorophorum NIES-1868	2331	47.5761	present (partial)	comp95833_c0_seq1	GCTCAAGCCGTATCGAGATTTTTGCGTAGGCGTTCGCATAGTTGTGTTTGCCGCCCTATATTCTTCTTTGCGACAAATGT TCGGTGCACCGCTTTCCCAAGTTTTCCTTATGCCGGATGGTGGGCGGTCAGTTGGCACCGCACGCAATCCCACAAATGCA ATATTTCCACGCGCTGCTGTAAATGGGGCAAGGATGCTGGAGGACCAGTCGAAGCCATCGCCAAGCCAAACGACAGTATT CGCAAGCAGTGCTGTCGTTGCTATCGCATCGTTGGCGATGCGTGCGCAAAAGCGTCGGCAAAGACAACTGATGCGCCACG CACGCAAGCTTCATATCCTCCGTGAGGCGCCTGTTCTGGCACCTGAAGTAAAATCAGAGAAATCAATTGGCGTTG…
IspG	Lepidodinium-2	comp110402_c0_seq1 Lepidodinium chlorophorum NIES-1868	2349	48.361	nd	comp110402_c0_seq1	GTATCCTCGGCTCAAGGACGAATTTTGCTACATGATCGTACGATGAAGATCCAGGCACATCTAGTCATGCGTCGTGTTGC CGTTACTATTTTGCTTGCGATCGTTGCGCAGGCCCATGACAAGGAACCAATGGACGAGTTGCTCGACACGTTGGTCGACG AGTTGTTTGTCCCAGACCGCCATGGGATGCAGTTCCACCACGCGCTGATGGGCAACACGACGCTCGGAGCACACGGGCGC CTCGCAAGCCAGGCTGCACTTGGCCACTCCATGTTATCTTCGGCCAGCTCCAAACAGCCTCTCCCATGTCGCGGCTTACT TAGCGGCAGACATAGTCTTGCAACTCGAAGAGATAGCTTTCCTACTTGTGCCGTTCCTCAGGGGGTCTATTGCGA…
IspH	Karenia-1	0173789044 Karenia brevis CCMP2229	1650	45.7576	nd	lcl|CAMNT_0014803007 /NCGR_SEQ_ID=MMETSP0029-20121228|7120 /TAXON_ID=156230 /ORGANISM="Karenia brevis, Strain CCMP2229" /LENGTH=1943	TAAGAGTTGGCTGTTGATTACGGAGAGCAAACTTAGAAGTTGGCTGTTGATATCGCGAGTCTCTTTGACATGTCGTTGACCATGCGGATGGTTTCTGTTCTCCTAGGATACTTAGCTTGTGCAAGCTACGGGCGCAGAGTACACCCAAAGCAGGAGGAAGGTCAAAAACTGACCATGAACGTGGAGTGCGGAGAAGCTTGTATAGGCCGCATGCTAAGATTCGCACAGTACCGCAACGCATGCGCAAAGGAGGCGGAGGCACTTGCGTCACCTCTGCAAGCAGCACATCCCGCAGCTGCCTGGAGCAGTCCTGGGGCAGGGCGTATCAACGGCCTCCTTCCGAACAGAGGGACGCGCCTCGACACACTGCGCGCCTCAGCTCCCGTGGCGGAGGGCTCT…
IspH	Karenia-2	0173843192 Karenia brevis CCMP2229	1614	50.062	present (partial)	lcl|CAMNT_0014866193 /NCGR_SEQ_ID=MMETSP0029-20121228|81676 /TAXON_ID=156230 /ORGANISM="Karenia brevis, Strain CCMP2229" /LENGTH=1728	GCTCAAGTTGCTTGCTTCAATCGGTTTTGGGAATATGTATAGGATCGCCCAGTTGCTGTTTTTGCTGGCCTGCGCAGGCCATGGCCGACGGATGCAAAACTCGTTGAAGTCATCACAAGACAACCAAGAGCCATTGAACACTTTTGATATCAATCTCGGTGATCACTCGGATGTTGAAGTGGAGCAGTCGAGCACACTCGACAGAGCCACAGGCGAATTTCCTGCAGGGACAGCCTTCACAATGCTTCTTCTGGCTCTCACCCCAGCGGCCGCATTTGTAGTGAACCCACTTGCGTCTGGAAAGCGGGTGCCGCGTGATTCCACCCTCCACAGTTCAACTGTGTTGGACGTGAAAAGGCAGGGAGATGTTTCTCAGCCCGCTCCAGTTATGAGCACGGC…
IspH	Karenia-3	0174063494 Karenia brevis CCMP2229	1239	44.7135	nd	lcl|CAMNT_0015120003 /NCGR_SEQ_ID=MMETSP0030-20121228|205024 /TAXON_ID=156230 /ORGANISM="Karenia brevis, Strain CCMP2229" /LENGTH=1283	CTCGTCGAAGGCGGCGCTGGAGCTCAACCGATCGCCAATCTCTATGGCCAATGTGCCAGGAGTGCTTAGACAAGAGACCT CCATGAGAGCTGCAGGCCACCAAGGCAGTGTGCAGAATAATGCACAGCAGCTGTGGGCAACTTCTGGAGCTGCTGCCGCG CTGGCCGGCGCGGCTGCATTCGCTGCCGCGCAACTACTGGCTTCCAGGCGCCCGCGCTCGGGCCGCCAGCTGACGTCAAC CCAAAGACACGTAACAGAGACCAAGGTGACGCCTCTGCCGACGGTGGATCGCAACGCCACCAAAGATCTGAGGAAAGACT TCCAGCGATCTGACCAGTATTTTAAGTTCAGTAGTGCGCAGATGCGGGACGCCACGAAAACCTTGAAAAGGATTA…
IspH	Karlodinium	0169356754 Karlodinium micrum CCMP2283	273	52.7473	nd	lcl|CAMNT_0009453577 /NCGR_SEQ_ID=MMETSP1017-20121227|27718 /TAXON_ID=342587 /ORGANISM="Karlodinium micrum, Strain CCMP2283" /LENGTH=810	TGGACTTATTTATTGCTGTATGGTTGGCGTGTGGGCCTTCACAAGTCTCTACGCGATCAAGGCAGCCACTCGAGCATAGTTCGCAGTCTTCACAAGAACTTGCCACCTTATTCCTTTCTGCTCTTACGCCACAGAGCAGGTCCAGAGCGCGCAGCCCAGTTCTTTCAGCATTAAAGACACCGACAGATTTAGAAGGCGTGGTTACACTTAAAAAAATAGAACCTGGCACTCTTGACAAGACGAAGGAGCGCAAGCGCATCATGAGCAACAAGGAATTCAAACGCGGTGCAAATCCTTTCGGTAGAGACATTCACAAAGGCGTTGCAGAGAAGATGAAAGCGTCGTTTTCGTCAGAAATGGTGCGTGAGATAAAAGAAGAGAGTAGTTTACAGGAGGTTA…
IspH	Lepidodinium-1	comp91619_c0_seq1 Lepidodinium chlorophorum NIES-1868	1743	45.3815	present	comp91619_c0_seq1	CTCAAGCCATTTTGCCTCAAGTGCTCTTTGCCCAAGCCACGTGTTGCTTAGGTTCTTTCCCAGCGGGTCAACGAGTTTGACATGTCGGCGGATATGCTCAGCCAGGCGTTCCTCGCTGCTGGCGGTGGTCCTCTACGCAAAGCGTACGGGGGGGTGCACCCATCGCAGGCGGTTGCACCGGCTGCTGTTGCAATCGGGGCCGAGGTGTCCAAAACCAGCGGCATTGACGATGGTTATTTCCAGGGGACCAGCAATGTGGCCGCGATGCTCTTGCTCGGCACTGGATCCCTCGCCGCAAGGGCGGCTGGCCGCCGTCGTGCCCAAAAGAGGCAATCGCGGCAGCACCGCTCGTCTCTTGTAGTCGTCGCTGGCGTTGACACGGAGGCTGCCGTGCAAACT…
IspH	Lepidodinium-2	comp108906_c0_seq1 Lepidodinium chlorophorum NIES-1868	1926	48.3385	present	comp108906_c0_seq1	CGTAGCCATTTTGGCTCAAGACAAAGATGCAAACAATGCCTAGCGTCATCGTGATCACTCTGCTCGCTCTCCCCGTGGCAGGCCACGCAGAAGAGCTAGTGGCGAGTGGCGGCAACAGCGCACAAGACTTTATTGACCAATTGGTCGACAGCTTCAGCGAAGAGTTGGTCGACCGAGCGCGTCAGGACCATATCTCCCCCGATACCAATTTGGATAATGTGACATTGGCGAAAACCTATCAAGGTTCCAGTCTTCGCCCTCAGTACACCAGGCTTCCAGTTTCCACAGTCTTTGTTCCACCCCTTGCACGCTCAGTTCCGCAAACCTTGGCGTCGTCTCGCGCACATGGTAGTCAACCACAGCGCGCATTGAATGTGCTAAGGGCGATTCAGCGACCAG…
