# Supplementary material for: Patterns in evolutionary origins of heme, chlorophyll a and isopentenyl diphosphate biosynthetic pathways suggest non-photosynthetic periods prior to plastid replacements in dinoflagellates
Source: PeerJ. 2018 Aug 3;6:e5345. doi: 10.7717/peerj.5345 (PMC6078071; doi:10.7717/peerj.5345)
Supplement: Supplemental Information 6 [file peerj-06-5345-s006.xlsx]

## Sheet: IPP
The KEGG Pathway, NCBI database and MMETSP/Peptides (CAMPEP) are shaded by grey, yellow and orange, respectively.
Species	DXS	IspC	IspD	IspE	IspF	IspG	IspH
Arabidopsis thaliana	AT4G15560	AT5G62790	AT2G02500	AT2G26930	AT1G63970	AT5G60600	AT4G34350
Oryza sativa japonica	4338768				4330320	4329911	4334003
Selaginella moellendorffii	SELMODRAFT_268187	SELMODRAFT_229487	SELMODRAFT_117940	SELMODRAFT_180163	SELMODRAFT_130637	SELMODRAFT_149035	SELMODRAFT_163924
Physcomitrella patens subsp. patens	PHYPADRAFT_137710	PHYPADRAFT_127023	PHYPADRAFT_144079	PHYPADRAFT_190580	PHYPADRAFT_150209	PHYPADRAFT_130936	PHYPADRAFT_194018
Chlamydomonas reinhardtii	CHLREDRAFT_196568	CHLREDRAFT_196606	CHLREDRAFT_196604	CHLREDRAFT_137673	CHLREDRAFT_188593	CHLREDRAFT_55268	CHLREDRAFT_59822
Volvox carteri f. nagariensis	VOLCADRAFT_107482	VOLCADRAFT_82431	VOLCADRAFT_84386		VOLCADRAFT_88137	VOLCADRAFT_63610	VOLCADRAFT_79586
Ostreococcus tauri	Ot02g03880	Ot04g03460			Ot11g00050	Ot09g00990	Ot08g01140
Ostreococcus lucimarinus			OSTLU_24843	OSTLU_4287
Micromonas sp. RCC299	MICPUN_107366	MICPUN_108708	MICPUN_83560	MICPUN_109549	MICPUN_113519	MICPUN_95921	MICPUN_97588
Chlorella variabilis	CHLNCDRAFT_59788				CHLNCDRAFT_53457	CHLNCDRAFT_144676	CHLNCDRAFT_59658
Pyramimonas parkeae CCMP726			0114305184	0114297928
Coccomyxa subellipsoidea				COCSUDRAFT_35952
Cyanidioschyzon merolae	CYME_CMF089C	CYME_CMG148C	CYME_CMH115C	CYME_CMS444C	CYME_CMT435C	CYME_CML284C	CYME_CMJ152C
Galdieria sulphuraria	Gasu_42090	Gasu_57430	Gasu_37730	Gasu_28410	Gasu_00190	Gasu_27800	Gasu_18090
Chondrus crispus	CHC_T00009061001	CHC_T00009191001		CHC_T00003708001	CHC_T00009483001	CHC_T00003814001	CHC_T00008841001
Porphyridium aerugineum SAG 1380-2	0184692978
Rhodosorus marinus CCMP 769	0113968508	0113963114			0113960182
Rhodosorus marinus UTEX LB 2760			0184746978				0184743818
Rhodella maculata CCMP 736			0184721902			0184713162	0184736938
Gloeochaete witrockiana SAG 46.84	0184648502		0184664136				0184657938
Gloeochaete wittrockiana SAG4.46.84		0184340186		0184339344	0184341180	0184344916
Chattonella subsalsa CCMP2191			0117819778	0117892280
Phaeodactylum tricornutum	PHATRDRAFT_bd1689	PHATRDRAFT_43204	PHATRDRAFT_21829	PHATRDRAFT_51700	PHATRDRAFT_56610	PHATRDRAFT_44955	PHATRDRAFT_50808
Thalassiosira pseudonana	THAPS_270312	THAPS_10943	THAPSDRAFT_3622	THAPSDRAFT_31907	THAPSDRAFT_10102	THAPSDRAFT_29228	THAPSDRAFT_270376
Nannochloropsis gaditana	NGA_0220301			NGA_0458410	NGA_0265102
Odontella aurita isolate 1302-5	0113541298		0113535656				0113579340
Odontella sinensis (Grunow) 1884				0183298366
Aureococcus anophagefferens CCMP1850	0168901208			0168983106			0168987648
Aureococcus anophagefferens		XP_009037498	XP_009034896		XP_009034550
Heterosigma akashiwo CCMP 452	0179502466						0179512244
Heterosigma akashiwo NB						0116692310
Ochromonas sp CCMP1899		0119052350	0119035270
Ochromonas sp. CCMP1393					0175019712		0174997420
Ochromonas sp. BG-1						0173141652
Leptocylindrus danicus var. apora B651			0116066908
Vaucheria litorea CCMP2940			0171482058
Ectocarpus siliculosus		CBJ29720	CBJ33583		CBJ31080
Paulinella chromatophora		YP_002048696	YP_002049377		YP_002048798	YP_002049460	YP_002049157
Eutreptiella gymnastica NIES-381	0113750948	0113732352		0113752354		0113735142	0113756500
Eutreptiella cf. gymnastica CCMP1594			0174310508		0174283928
Lotharella globosa LEX01	0114060686	0114081374	0114089826	0114086518	0114056930		0114075810
Bigelowiella natans CCMP 2755	0114190528	0114187812	0114199508	0114191686
Bigelowiella natans CCMP1258.1						0172237216
Bigelowiella natans CCMP623							0169527978
Chlorarachnion reptans CCCM449	0114499366	0114508100		0114500944	0114517874
Gymnochlora sp. CCMP2014				0167761306	0167749530
Isochrysis galbana CCMP1323	0179770104	0183624696	0179759884	0183636804		0179776570	0179771330
Isochrysis sp. CCMP1324					0185137204
Prymnesium parvum Texoma1	0113260996	0182837810	0182800506	0182846096	0184376328	0182807604	0113257910
Chyrsochromulina ericina CCMP281	0181179622					0181208008
Chrysochromulina polylepis CCMP1757			0183248134	0183277456	0183248238
Chrysochromulina polylepis UIO037							0115775280
Pavlova sp. CCMP459	0185565680	0185192044	0185207292				0185162162
Gephyrocapsa oceanica RCC1303	0185283944	0185346264	0185361672	0185476162	0185289276		0185364660
Phaeocystis Sp CCMP2710	0118829298	0118849578
Phaeocystis antarctica Caron Lab Isolate			0172974860
Emiliania huxleyi	EMIHUDRAFT_440786	EMIHUDRAFT_68547	EMIHUDRAFT_443903	EMIHUDRAFT_461009	EMIHUDRAFT_196709	EMIHUDRAFT_118009 EMIHUDRAFT_442353 EMIHUDRAFT_447290	EMIHUDRAFT_112566
Coccolithus pelagicus ssp braarudi PLY182g		0183350292	0183339990	0183346108	0183352660		0183382476
Cryptomonas curvata CCAP979/52						0172178732
Guillardia theta	GUITHDRAFT_84075	GUITHDRAFT_97309	GUITHDRAFT_147863	0113778114	GUITHDRAFT_154316	GUITHDRAFT_63981	GUITHDRAFT_162757
Rhodomonas lens RHODO	0177705860			0177692558	0177695614
Rhodomonas salina CCMP1319						0172098756
Rhodomonas abbreviata Caron Lab Isolate							0181315406
Hemiselmis andersenii CCMP644	0114134042	0114138138	0114156072		0114117550		0114125472
Hemiselmis andersenii CCMP441						0172060638
Hemiselmis rufescens PCC563				0173471262
Vitrella brassicaformis (Alveolata sp. CCMP3155)	0184568928	0184583350	0184563478	0184582708	CEM14921	0184583094	0184591178
Chromera velia CCMP2878	0184606382	0184616664	0184619590	0184616780	0184619320	0184614250	0184616660
Voromonas pontica	AHI16947			AHI16948		AHI16949
Gymnodinium catenatum GC744		0117557204		0117590160	0117519198		0117519034
Peridinium aciculiferum PAER-2	0183529418	0183502426	0183414434	0183512432	0183604172		0183556134
Heterocapsa rotundata SCCAP K-0483	0168641632	0168680130	0168666432		0168656708		0168643642 0168652412
Amphidinium carterae CCMP1314	0176621178			0176602222
Symbiodinium sp. CCMP2430	0181589578			0181582614	0181646714
Symbiodinium sp. CCMP421		0181444350	0181413336			0181469920	0181453724
Polarella glacialis CCMP 1383	0115130324		0115064180	0115073734	0115062264
Protoceratium reticulatum CCCM 535 (=CCMP 1889)			0168365132				0168380530
Lingulodinium polyedrum CCMP 1738	0117927190	0118340178	0118267856	0118487862	0118373690	0118014960	0118492116
Prorocentrum minium CCMP2233				0176888288
Togula jolla CCCM 725					0170651144
Alexandrium minutum CCMP113					0113832780
Alexandrium catenella OF101						0171193252
Kryptoperidinium foliaceum CCMP 1326					0176071452		0176062474 0176291072
Durinskia baltica CSIRO CS-38					0170263684	0170217864 0170359798	0170387658 0170388220
Karenia brevis Wilson	0178117440	0114735228			0114855984
Karenia brevis CCMP2229			0174195266		0173950708	0173636972	0173789044 0173843192 0174063494
Karenia brevis				comp89287_c0_seq1 comp129272_c1_seq1
Karlodinium micrum CCMP2283	0169082592	0169122770	0169274054		0169223484	0169104574	0169356754
Karlodinium micrum				comp176232_c0_seq1
Lepidodinium chlorophorum NIES-1868	comp57335_c0_seq1 comp18684_c0_seq1	comp117701_c0_seq1 comp116845_c0_seq1	comp105386_c0_seq1 comp140699_c0_seq1	comp47335_c0_seq1	comp109737_c0_seq1 comp84031_c0_seq1	comp110402_c0_seq1 comp95833_c0_seq1	comp108906_c0_seq1 comp91619_c0_seq1
Lepidodinium chlorophorum				CCC15094
Oxyrrhis marina		ACE81815
Perkinsus marinus ATCC 50439		BAG14386	BAJ39923
Synechocystis sp. PCC 6803	sll1945	sll0019	slr0951	sll0711	slr1542	slr2136	slr0348
Synechococcus sp. WH8102	SYNW1292	SYNW0698	SYNW1849	SYNW1053	SYNW1610	SYNW1174	SYNW0252
Thermosynechococcus sp. NK55	NK55_01580
Thermosynechococcus elongatus					tlr2035	tlr0996	tlr1041
Microcystis aeruginosa	MAE_62650		MAE_45830		MAE_31930	MAE_28180	MAE_16190
Acaryochloris marina	AM1_5186	AM1_0563	AM1_3984		AM1_2915	AM1_0149	AM1_4950
Trichodesmium erythraeum	Tery_3042	Tery_0416	Tery_0609	Tery_4700	Tery_4716		Tery_4479
Nostoc sp. PCC 7120	alr0599	alr4351	all5167	alr3230	alr3883	all2501	all0985
Anabaena variabilis	Ava_4532	Ava_1300	Ava_2414	Ava_4887	Ava_1811	Ava_0433	Ava_2949
Prochlorococcus marinus SS120		Pro_1236	Pro_0453	Pro_0764		Pro_1015	Pro_0296
Oscillatoria acuminata				Oscil6304_3757	Oscil6304_4910	Oscil6304_2940
Toxoplasma gondii	TGME49_008820	TGME49_014850			TGME49_055690	TGME49_062430	TGME49_027420
Plasmodium falciparum 3D7		PF14_0641		PFE0150c	PFB0420w	PF10_0221	PFA_0225w
Plasmodium vivax							PVX_081535
Theileria orientalis		TOT_020001022	TOT_030000808
Theileria parva					TP03_0365		TP03_0674
Theileria annulata						TA14455
Babesia equi		BEWA_017980
Babesia bovis							BBOV_III001660

## Sheet: Heme
The KEGG Pathway, NCBI database and MMETSP/Peptides (CAMPEP) are shaded by grey, yellow and orange, respectively.
Species	GTR	GSAT	ALAD	PBGD	UROS	UROD	CPOX	PPOX	FeCH
Arabidopsis thaliana	AT2G31250	AT3G48730	AT1G44318 AT1G69740	AT5G08280	AT2G26540	AT2G40490 AT3G14930	AT1G03475	AT4G01690 AT5G14220	AT2G30390 AT5G26030
Oryza sativa japonica	4349044	4346136	4341997	4328432	4331869	4326635 4332771	4336951	4327918	4338537 4346651
Physcomitrella patens subsp. patens	PHYPADRAFT_147215
Zea mays								541866 542554
Chlamydomonas reinhardtii	CHLREDRAFT_183460	CHLREDRAFT_138524	CHLREDRAFT_186639	CHLREDRAFT_166608 CHLREDRAFT_194475	CHLREDRAFT_195943	CHLREDRAFT_132194 CHLREDRAFT_186446	CHLREDRAFT_205686 CHLREDRAFT_53583	CHLREDRAFT_191043	CHLREDRAFT_183446
Volvox carteri f. nagariensis	VOLCADRAFT_81610	VOLCADRAFT_74470	VOLCADRAFT_72683	VOLCADRAFT_119454 VOLCADRAFT_85406	VOLCADRAFT_69473	VOLCADRAFT_74033 VOLCADRAFT_83541	VOLCADRAFT_103455 VOLCADRAFT_55865	VOLCADRAFT_83109	VOLCADRAFT_109142
Ostreococcus tauri	Ot11g00720	Ot20g00090	Ot01g02360	Ot05g01220		Ot05g01080 Ot12g02500 Ot17g00180	Ot03g03170	Ot06g03600	Ot11g02860
Ostreococcus lucimarinus					OSTLU_5668
Micromonas sp. RCC299	MICPUN_62986	MICPUN_61667	MICPUN_93011	MICPUN_78011	MICPUN_60121	MICPUN_104963 MICPUN_54920 MICPUN_96206	MICPUN_104790 MICPUN_80311	MICPUN_60613	MICPUN_96687
Chlorella variabilis		CHLNCDRAFT_37143	CHLNCDRAFT_137125	CHLNCDRAFT_33052	CHLNCDRAFT_34953	CHLNCDRAFT_32323 CHLNCDRAFT_48884	CHLNCDRAFT_142838 CHLNCDRAFT_53914	CHLNCDRAFT_57492	CHLNCDRAFT_24443
Cyanidioschyzon merolae	CYME_CMJ054C	CYME_CMP285C	CYME_CMD104C	CYME_CME132C	CYME_CML040C	CYME_CME194C CYME_CMP083C	CYME_CMO136C	CYME_CMB025C	CYME_CMS035C
Galdieria sulphuraria	Gasu_39730		Gasu_54890	Gasu_43810	Gasu_13390	Gasu_52210	Gasu_19740	Gasu_09770	Gasu_58560
Chondrus crispus	CHC_T00009215001		CHC_T00008491001		CHC_T00007253001	CHC_T00008531001	CHC_T00003096001 CHC_T00008857001	CHC_T00000813001 CHC_T00004880001	CHC_T00008918001
Porphyridium aerugineum SAG 1380-2	0184696212	0184700034	0184706278	0184691422	0184699642	0184691570 0184696998 0184699034	0184696282	0184699202	0184693278 0184696464
Rhodosorus marinus CCMP 769									0113958748 0113959660
Rhodosorus marinus UTEX LB 2760	0184750346	0184753710	0184741662	0184740658	0184743578 0184745894	0184752734	0184752014	0184751702
Rhodella maculata CCMP 736	0184734406	0174895728	0184727660	0184726920		0184716820 0174893374 0174911626	0184718318		0184718616
Gloeochaete witrockiana SAG 46.84		0184648526	0184660252			0184645982 0184649676
Gloeochaete wittrockiana SAG4.46.84				0184347616	0184354728		0184331696 0184334158 0184340724	0184348280	0184347098 0184373352
Chattonella subsalsa CCMP2191	0117760464	0117766996	0117794952		0117802268	0117833124 0117876454 0117881598	0117744362 0117829320	0117757408	0117887522
Phaeodactylum tricornutum	PHATRDRAFT_54134	PHATRDRAFT_50966	PHATRDRAFT_50723	PHATRDRAFT_51811	PHATRDRAFT_44610	PHATRDRAFT_16140 PHATRDRAFT_19188	PHATRDRAFT_12186 PHATRDRAFT_15068 PHATR_10640	PHATRDRAFT_31109	PHATRDRAFT_45357
Thalassiosira pseudonana	THAPSDRAFT_270328	THAPS_258111	THAPSDRAFT_270280	THAPSDRAFT_9021		THAPSDRAFT_270346 THAPSDRAFT_719	THAPSDRAFT_31012 THAPSDRAFT_38022	THAPSDRAFT_264901	THAPSDRAFT_270314
Thalassiosira pseudonana CCMP1335					XP_002287550
Nannochloropsis gaditana	EWM27669							NGA_0387300	NGA_0074800
Odontella aurita isolate 1302-5	0113538574	0113534814	0113534360	0113529822 0113534782	0113597148	0113531312 0113541484 0113541976	0113540398 0113557064 0113560540	0113571914	0113542106
Aureococcus anophagefferens CCMP1850	0168894300	0168878856	0168945296	0168903534		0168985872 0168987092 0169016928	0168931908 0168977070	0168883074	0168926144
Heterosigma akashiwo CCMP 452	0179512894	0179585406	0179591526	0179508924	0179509414	0179504532 0179554512 0179592880	0179505848	0179593708
Ochromonas sp CCMP1899						0119039590 0119040116 0119041608		0119033874
Ochromonas sp. CCMP1393	0174968346	0174987786	0174971488		0174958076
Ochromonas sp. BG-1				0173153566			0173149946
Chaetoceros cf. neogracile RCC1993						0119450946 0119453932 0119440980			0119446746
Chaetoceros sp. GSL56					0176487442		0176485018 0176491848	0176483042
Ectocarpus siliculosus	CBN76275					CBJ49184 CBN74278 CBN74275		CBJ31610	CBJ25992
Paulinella chromatophora	YP_002048928		YP_002049307			YP_002049486			YP_002049510
Eutreptiella gymnastica NIES-381	0113746568	0113741974	0113752394	0113747930		0113737578 0113747088 0113750802 0113768108	0113750582 0113757338	0113745558	0113747136
Lotharella globosa LEX01	0114071776	0114075744	0114071582 0114086272	0114059306 0114063770	0114071950	0114073834 0114076264 0114076804 0114090018 0114100898	0114057312 0114062430 0114075276	0114079266 0114081550	0114078630 0114090658
Bigelowiella natans CCMP 2755				0114192180
Bigelowiella natans CCMP1259								0169584406 0169587018
Bigelowiella natans CCMP1258.1	0172236660	0172235998	0172241266 0172245432	0172223860	0172227190	0172223500 0172234140 0172234722 0172249412	0172218534 0172220208 0172235098 0172264846		0172250614 0172252102
Chlorarachnion reptans CCCM449	0114510088	0114509680	0114537212 0114537720	0114500486	0114489228	0114508820 0114517636 0114517718 0114520224	0114489856 0114493834 0114495082 0114527004	0114497086 0114510122	0114521106 0114527638
Gymnochlora sp. CCMP2014	0167750752	0167755858	0167758422 0167762218	0167747312 0167754326	0167760958	0167758162 0167758232 0167746634 0167757508 0167744612	0167760650 0167768958 0167770414	0167757382	0167746608 0167758858
Isochrysis galbana CCMP1323	0183641998	0179760572	0179758390	0183611656	0179762322 0183625014	0179795568 0183615286 0179801978	0179755146 0179784000	0179767072	0183612706 0183619294
Prymnesium parvum Texoma1	0113241858	0182819088	0113243222	0113252016	0113272904	0113244454 0113252678 0182822674	0113229250 0184387318	0182811004	0113241064 0182799114
Chrysochromulina polylepis CCMP1757				0183044092	0183094094		0183008722	0183236942	0183026858 0183111930 0183223492
Chrysochromulina polylepis UIO037	0115786910	0115800860	0115788672			0115774814 0115813804
Pavlova sp. CCMP459	0185155024	0185164338	0185541422	0185165038	0185181440	0185170190 0185173334 0185190998	0185549646	0185192770	0185165904 0185213872
Gephyrocapsa oceanica RCC1303	0185311294	0185308112		0185283270	0185383256	0185297710 0185352170 0185381182	0185369688 0185431862	0185371034	0185322126 0185435326
Phaeocystis antarctica Caron Lab Isolate					0173017914			0172980566
Emiliania huxleyi	EMIHUDRAFT_462917	EMIHUDRAFT_437052	EMIHUDRAFT_448062	EMIHUDRAFT_423968	EMIHUDRAFT_54852	EMIHUDRAFT_361296 EMIHUDRAFT_435069	EMIHUDRAFT_432924 EMIHUDRAFT_61042	EMIHUDRAFT_463658	EMIHUDRAFT_53434 EMIHUDRAFT_452759
Emiliania huxleyi PLY M219			0181870900
Coccolithus pelagicus ssp braarudi PLY182g	0183335170	0183360278	0183352096		0183366178	0183337656 0183353410 0183353500		0183355058	0183366860 0183383720
Cryptomonas curvata CCAP979/52	0172163626		0172176226
Guillardia theta	GUITHDRAFT_115635	GUITHDRAFT_166481	GUITHDRAFT_160911	GUITHDRAFT_162740	GUITHDRAFT_70083	GUITHDRAFT_154354 GUITHDRAFT_76641	GUITHDRAFT_164330 GUITHDRAFT_181316 GUITHDRAFT_88140	GUITHDRAFT_98119	GUITHDRAFT_157086 GUITHDRAFT_159124
Rhodomonas lens RHODO					0177715206
Rhodomonas salina CCMP1319	0172105638	0172099398	0172122912			0172119270 0172127120	0172110934		0172124152
Rhodomonas abbreviata Caron Lab Isolate				0181320682
Hemiselmis andersenii CCMP644				0114124440		0114127530 0114131832 0114134476	0114124794 0114139832 0114140906	0114120494 0114146556	0114129690 0114131820 0114111394
Hemiselmis andersenii CCMP441	0172060378	0172071584	0172066558
Vitrella brassicaformis (Alveolata sp. CCMP3155)			0184572318	0184565872	CEM25869	0184595740	0184584042 0184598890	0184572576 0184584548 0184590104	0184579030 0184583824
Chromera velia CCMP2878			0184617916 0184639294	0184616446	0184619390	0184618760 0184637614 0184618316	0184609716 0184609756	0184618064	0184611348 0184619528
Gymnodinium catenatum GC744	0117466520	0117484338			0117540008	0117551674 0117571066 0117544934 0117527892		0117558894	0117464132 0117613902
Peridinium aciculiferum PAER-2	0183587140	0183600256	0183553946	0183600692		0183398576 0183507576 0183522554
Heterocapsa rotundata SCCAP K-0483	0168646572	0168659660	0168644080	0168639496	0168684538	0168635000 0168651120 0168646744	0168653662	0168643262	0168655148
Amphidinium carterae CCMP1314	0176640500	0176618000	0176622048	0176636178		0176615390 0176646624 0176604198	0176613682 0176617344	0176642414	0176649974
Amphidinium massartii CS-259					0178420724
Symbiodinium sp. CCMP2430					0181677860
Symbiodinium sp. CCMP421	0181449376	0181423196	0181426098	0181482198		0181450656 0181460798 0181478468	0181433514 0181462108	0181420296	0181515516 0181483406
Polarella glacialis CCMP 1383				0115067848		0115059574 0115081650 0115085866			0115065642 0115048492
Lingulodinium polyedrum CCMP 1738	0118413002	0117997960	0118122296	0118453116	0118388808	0117919836 0118284190 0118453356	0118158006 0118434790	0118260776 0118414258	0118460638
Togula jolla CCCM 725	0170595492	0170611850	0170620460	0170603090	0170626636	0170600942 0170613368 0170623232	0170599528	0170587328 0170602588	0170633508 0170602272
Alexandrium minutum CCMP113						0113819362
Alexandrium catenella OF101		0171185694	0171195706				0171160054		0171200776 0171291274
Alexandrium monilatum CCMP3105					0175422016			0175554486 0175658780
Kryptoperidinium foliaceum CCMP 1326	0176095494 0176139256 0176008842	0176062260 0176079032	0176013044 0176081596	0176042930 0176225748	0176054746	0176134404 0176245300 0176084498 0176058286 0176025754 0176015350	0176054320 0176076948 0176166910 0176192584	0176026912 0176092760	0176021018 0176142834 0176329658
Durinskia baltica CSIRO CS-38	0170203500 0170214216	0170249184 0170399974 0170418020	0170247008 0170370078 0170207120	0170235532 0170236762 0170356276	0170201904	0170210164 0170212240 0170274076 0170282728 0170325374 0170327700 0170417642	0170206590 0170242944 0170373592 0170378094 0170388684	0170253320	0170207730 0170252210 0170394926
Karenia brevis Wilson							0178299624
Karenia brevis CCMP2229	0173766322 0173944140	0174148230	0173985684	0173664682 0174104254		0173653438 0173802408 0173889316 0173945920 0173962192		0173913076 0174085696	0173708630 0173862386 0173900314
Karenia brevis					CO063310
Karlodinium micrum CCMP2283	0169115198 0169242318	0169080304	0169115526	0169202984 0169217900 0169259902 0169355422	0169208488 0169295394	0169182992 0169231014 0169276646 0169333044		0169395544	0169088058
Lepidodinium chlorophorum NIES-1868	comp33846_c0_seq1 comp80736_c0_seq2 comp92172_c0_seq1	comp77636_c1_seq10 comp86847_c0_seq1 comp196565_c0_seq1	comp213547_c0_seq1 comp100813_c0_seq1	comp35568_c0_seq1 comp91161_c0_seq1	comp839_c0_seq1	comp150338_c0_seq1 comp67210_c0_seq1 comp144032_c0_seq1 comp13953_c0_seq1 comp130613_c0_seq1 comp109512_c0_seq1 comp101059_c0_seq1	comp186503_c0_seq1 comp44233_c0_seq2 comp44233_c0_seq1	21517_c0_seq1 112996_c0_seq1 24448_c0_seq1	115243_c0_seq1 121137_c0_seq1 20534_c0_seq1 218722_c0_seq1 36906_c0_seq1
Oxyrrhis marina				ACE81820
Synechocystis sp. PCC 6803	slr1808	sll0017	sll1994	slr1887		slr0536	sll1185		slr0839
Synechococcus sp. WH8102	SYNW1117	SYNW1809	SYNW1933	SYNW1785	SYNW2210	SYNW1495	SYNW2040		SYNW1747
Thermosynechococcus elongatus	tll1738		tll0422	tll1646		tlr0741	tll0684
Microcystis aeruginosa	MAE_30010	MAE_38680	MAE_22850 MAE_39770	MAE_42680		MAE_31290	MAE_06700
Acaryochloris marina	AM1_5760	AM1_0549	AM1_3071 AM1_4803	AM1_3944	AM1_1388	AM1_6351	AM1_0615		AM1_1959
Trichodesmium erythraeum	Tery_0949	Tery_2741	Tery_4608	Tery_4621		Tery_1714	Tery_1166	Tery_2218	Tery_0602 Tery_4313
Nostoc sp. PCC 7120	alr1042	alr3265	all4725 alr4380	alr1878	all0287	all3909	all0650		alr3751
Anabaena variabilis	Ava_3699	Ava_4920	Ava_1946 Ava_3297 Ava_B0225	Ava_4774	Ava_3075	Ava_1788	Ava_4581 Ava_4996		Ava_1574 Ava_2754
Prochlorococcus marinus SS120		Pro_0482	Pro_0243	Pro_0494	Pro_0134	Pro_1079	Pro_1737		Pro_0525
Toxoplasma gondii			TGME49_053900	TGME49_071420		TGME49_089940	TGME49_023020
Plasmodium falciparum 3D7				PFL0480w					MAL13P1.326
Streptomyces coelicolor	SCO3319	SCO4469	SCO3311	SCO3318 SCO7343	SCO2958	SCO6031			SCO5859
Mycobacterium tuberculosis H37Rv	Rv0509	Rv0524	Rv0512	Rv0510	Rv0260c	Rv2678c			Rv1485
Corynebacterium diphtheriae NCTC 13129	DIP0400	DIP0409	DIP0403	DIP0401		DIP0407			DIP1280
Pyrobaculum aerophilum	PAE0601	PAE0594	PAE0583	PAE0580	PAE2594 PAE0589 PAE2593
Sulfolobus tokodaii	STK_02120	STK_02150	STK_02140	STK_02170	STK_02180
Escherichia coli K-12 MG1655	b1210		b0369	b3805		b3997	b2436		b0475
Thermoplasma volcanium	TVN0590	TVN0635	TVN1100	TVN0634	TVN0633	TVN1292
Vibrio cholerae O395	VC0395_A1757		VC0395_A2413	VC0395_A2398
Picrophilus torridus	PTO0918	PTO0248	PTO1311	PTO0249	PTO0250	PTO1413
Listeria monocytogenes EGD-e	lmo1557	lmo1685 lmo1553	lmo1554	lmo1556	lmo1555	lmo2212		lmo0884	lmo2211
Staphylococcus aureus subsp. aureus ED98	SAAV_1659	SAAV_1914 SAAV_1654	SAAV_1655	SAAV_1657	SAAV_1656
Bacillus anthracis Ames	BA_4698		BA_4694	BA_4696	BA_4695	BA_1070		BA_2418 BA_1072	BA_1071 BA_1158
Neisseria meningitidis Z2491	NMA0760		NMA1011	NMA0718
Burkholderia xenovorans LB400	Bxe_A0437		Bxe_A0344	Bxe_A3411		Bxe_A0044	Bxe_A3261		Bxe_A3965
Ralstonia solanacearum GMI1000	RSc2900		RSc2989	RSc2357		RSc3303	RSc2192		RSc2643
Pseudoalteromonas atlantica	Patl_2564		Patl_4219	Patl_0342		Patl_0245	Patl_0029		Patl_3987
Cryptomonas paramecium CCAP977/2a		0113712216				0113712910	0113685026	0113723830	0113695748
Schizosaccharomyces pombe			SPAC1805.06c	SPAC24B11.13	SPAC31G5.08	SPCC4B3.05c	SPAC222.11	SPAC1F5.07c	SPCC320.09
Paramecium tetraurelia			GSPATT00010579001	XP_001424232		GSPATT00006394001	GSPATT00007017001		PTMB.433c
Tetrahymena thermophila			TTHERM_00636900	XP_001021402		TTHERM_00047580	TTHERM_00716050	TTHERM_00157800	TTHERM_00439000
Laccaria bicolor			LACBIDRAFT_296233	LACBIDRAFT_181601 LACBIDRAFT_248667	LACBIDRAFT_318859	LACBIDRAFT_191778	LACBIDRAFT_159108		LACBIDRAFT_313652
Aspergillus clavatus			ACLA_026820	ACLA_014820 ACLA_061420	ACLA_086050	ACLA_029590	ACLA_027130		ACLA_012760
Saccharomyces cerevisiae			YGL040C	YDL205C	YOR278W	YDR047W	YDR044W		YOR176W
Homo sapiens			210	3145	7390	7389	1371	5498	2235
Mus musculus			17025	15288	22276	22275	12892	19044	14151
Drosophila melanogaster			Dmel_CG10335	Dmel_CG9165	Dmel_CG1885	Dmel_CG1818	Dmel_CG3433	Dmel_CG5796	Dmel_CG2098
Monosiga brevicollis			MONBRDRAFT_26688	XP_001749392		XP_001749392	MONBRDRAFT_28565
Dictyostelium discoideum			DDB_G0269444	DDB_G0284697	XP_639993	DDB_G0292294	DDB_G0288893	DDB_G0292040	DDB_G0288891
Phytophthora infestans			PITG_13832	XP_002900484	PITG_10080	PITG_00566	PITG_18296 PITG_18298		PITG_14808
Acanthamoeba castellanii			ACA1_258320	XP_004340527	ACA1_190010	ACA1_333350	ACA1_058760	ACA1_115400
Perkinsus marinus ATCC 50983			XP_002766390			XP_002780585
Rhodospirillum centenum			RC1_1353	WP_012567533		RC1_2798	RC1_3420		RC1_2797 RC1_3547
Nitrobacter hamburgensis			Nham_2240	WP_011509156		Nham_2936	Nham_3246		Nham_3415
Rhodopseudomonas palustris CGA009			RPA2712			RPA1509	RPA1514		RPA0875
Sphingomonas sp. MM-1			G432_13715				G432_02050
Rickettsia prowazekii Madrid E			RP539			RP885	RP882		RP884
Rickettsia prowazekii				WP_004597702
Euglena gracilis					AEA86531		AEA86532	AEA86536 AEA86535	AEA86538 AEA86537
Ustilago maydis 521			XP_011388864
Palpitomonas bilix NIES-2562			0113880912
Sphingobium chlorophenolicum				WP_013848232
Paraphysomonas Paraphysomonas imperforata PA2						0114432916
Paraphysomonas bandaiensis Caron Lab Isolate							0185029640	0185031752	0185033538
Vibrio cholerae O1 biovar El Tor N16961						VC0332	VC0055		VC0987
Staphylococcus aureus subsp. aureus N315						SA1652		SA1650	SA1651
Neisseria meningitidis MC58						NMB0781			NMB0718
Synechococcus sp. JA-2-3B'a(2-13)								WP_049749573
Synechococcus sp. JA-3-3Ab								WP_011429973

## Sheet: Chla
Accession numbers for the KEGG Pathway, NCBI database and MMETSP/Peptides (CAMPEP) are shaded by grey, yellow and orange, respectively.
Species	MgCH(D)	MgCH(I)	MgCH(H)	MgPMT	POR	N-DVR	F-DVR	CS
Arabidopsis thaliana	AT1G08520	AT4G18480	AT5G13630	AT4G25080	AT4G27440; AT1G03630	NP_197367	NP_171956	AT3G51820
Citrus sinensis						XP_006489151
Oryza sativa japonica	4334537	4333259	4332690	4340015	4337415	NP_001050115	BAF14371	4338498
Selaginella moellendorffii	SELMODRAFT_174616	SELMODRAFT_230423	SELMODRAFT_233092	SELMODRAFT_108922	SELMODRAFT_150541 SELMODRAFT_142334	XP_002987313		SELMODRAFT_424937 SELMODRAFT_423983
Physcomitrella patens subsp. patens	PHYPADRAFT_210987	PHYPADRAFT_119751	PHYPADRAFT_9825	PHYPADRAFT_152627	PHYPADRAFT_217750 PHYPADRAFT_134131	XP_001771287	XP_001770443	PHYPADRAFT_113036
Populus trichocarpa							XP_002315601	POPTR_0006s10300g
Vitis vinifera							XP_002285592
Zea mays	103625782	732841	100382191	100273426	100381344 100381341 100283531 100194154			100274372
Chlamydomonas reinhardtii	CHLREDRAFT_134594	Q94FT3 XP_001690873	CHLREDRAFT_105632 CHLREDRAFT_195524	CHLREDRAFT_195575	CHLREDRAFT_136589	XP_001690168	XP_001699546	CHLREDRAFT_5437
Volvox carteri f. nagariensis	VOLCADRAFT_107092		VOLCADRAFT_106601 VOLCADRAFT_76537	VOLCADRAFT_109643	VOLCADRAFT_81013	XP_002953959		VOLCADRAFT_80530
Ostreococcus tauri	Ot05g05120	Ot02g04440	Ot05g01030 Ot04g02230	Ot07g02420	Ot07g01640		CEF98570
Ostreococcus lucimarinus								OSTLU_16384
Ostreococcus lucimarinus CCE9901							XP_001416225
Micromonas pusilla								MICPUCDRAFT_33362
Micromonas sp. RCC299	MICPUN_62064	MICPUN_107341	MICPUN_104801 MICPUN_58266	MICPUN_96236	MICPUN_93411		XP_002503439
Chlorella variabilis			CHLNCDRAFT_25038	CHLNCDRAFT_27668	CHLNCDRAFT_139763	XP_005850169		CHLNCDRAFT_34863
Chlorella sp. ArM0029B		AGZ19336
Picocystis salinarum CCMP1897								0183826634
Pyramimonas parkeae CCMP726								0114298676
Coccomyxa subellipsoidea	COCSUDRAFT_54337	CospP_p079	COCSUDRAFT_12706 COCSUDRAFT_62355		COCSUDRAFT_65591	XP_005649981		COCSUDRAFT_27450
Tetraselmis sp. CCMP879								0114228816
Cyanidioschyzon merolae	CYME_CMM270C	NP_848952	CYME_CMO212C CYME_CMB093C	CYME_CMI038C	CYME_CMD190C CYME_CMG217C CYME_CMN338C		XP_005534820	CYME_CMT220C
Galdieria sulphuraria	Gasu_14220	YP_009051162		Gasu_37430			XP_005706147	Gasu_27160
Chondrus crispus	CHC_T00008429001	YP_007627492
Porphyridium aerugineum SAG 1380-2	0184695122		0184700140 0184693040	0184697400	0184699084	0184699804		0184707212
Rhodosorus marinus CCMP 769		0113955118				0113964992
Rhodosorus marinus UTEX LB 2760	0184754804		0184738144	0184740934	0184754050			0184746642
Rhodella maculata CCMP 736		0174906420	0184711184 0184736436	0174905808	0184715814
Cyanophora paradoxa					Contig6776
Gloeochaete witrockiana SAG 46.84					0184648472		0184340556	0184336372
Gloeochaete wittrockiana SAG4.46.84	0184351232			0184348314
Chattonella subsalsa CCMP2191
Bolidomonas pacifica RCC208								0182453816
Phaeodactylum tricornutum CCAP 1055/1					XP_002179689	XP_002184654
Phaeodactylum tricornutum	PHATRDRAFT_50740	YP_874390	PHATRDRAFT_56602 PHATR_13265	PHATRDRAFT_18872	XP_002180992			PHATRDRAFT_46085
Thalassiosira pseudonana	THAPSDRAFT_270340		THAPSDRAFT_26573 THAPSDRAFT_270359	THAPSDRAFT_270378	XP_002290537 XP_002286918	XP_002288833	XP_002288079	THAPSDRAFT_4748
Nannochloropsis gaditana					NGA_0495900	EWM24553
Nannochloropsis gaditana CCMP526			XP_005855588
Odontella aurita isolate 1302-5	0113546444	0113537338	0113537462	0113544574	0113548254 0113532480	0113575052 0113535666	0113553612
Odontella sinensis (Grunow) 1884								0183306330
Aureococcus anophagefferens CCMP1850	0168949128		0169048100	0168981918	0169017634 0168899492			0168892546
Aureococcus anophagefferens		YP_003002095				XP_009033859
Chaetoceros simplex		YP_009092935
Chaetoceros sp. GSL56	0176492392 0176484444		0176503824 0176490900	0176492532	0176495236 0176496422	0176482966 0176481854
Heterosigma akashiwo CCMP3107	0116626590		0116585180	0116641540	0116628234 0116623340	0116636710
Heterosigma akashiwo NB							0116791180
Heterosigma akashiwo		YP_001936315
Nitszchia sp. RCC80	0113497824		0113452158	0113454664	0113509632 0113491862 0113475300 0113444226	0113464300		0113459404
Ochromonas sp CCMP1899			0119051582 0119053940	0119042524	0119040424	0119042028
Ochromonas sp. CCMP1393		AIM52824
Ochromonas sp. BG-1
Pelagomonas calceolata RCC969	0119235846		0119242130	0119234258	0119234810 0119233572	0119254156
uncultured Pelagomonas		AFR24772
Pseudo-nitzschia australis 10249 10 AB								0168184114
Rhizochromulina marina cf CCMP1243	0118982598		0119002538	0118989500 0118981428	0118974248	0118976776
Skeletonema costatum RA080513-05	0113390056	0113402956	0113424438	0113391154	0113408532 0113379692	0113392556 0113420456	0113381684
Skeletonema marinoi skelA								0184918272
Ectocarpus siliculosus	CBJ27091	YP_003289253	CBJ27229 CBJ25524			CBJ30364
Paulinella chromatophora	YP_002049144				YP_002049520		YP_002049409
Euglena gracilis		NP_041888
Eutreptia viridis		AEQ94253
Eutreptiella gymnastica NIES-381			0113773522 0113737652	0113749118	0113742728 0113741178	0113758230	0113744508
Eutreptiella cf. gymnastica CCMP1594	0174351382							0174287134
Lotharella globosa LEX01	0114075732	0114071486	0114086854 0114076340	0114106400	0114099610 0114081362 0114063672 0114060454	0114075906	0114069464
Lotharella globosa CCCM811								0167786468
Bigelowiella natans CCMP 2755								0114203054
Bigelowiella natans CCMP1258.1
Bigelowiella natans CCMP623
Bigelowiella natans CCMP1242	0185226390	0185225498	0185226522	0185225580	0185248308 0185227952 0185223468	0185223564	0185228724
Chlorarachnion reptans CCCM449	0114530642	0114507182	0114497224	0114514454	0114522438	0114520204		0114526530 0114527984
Gymnochlora sp. CCMP2014	0167755082	0167760362	0167751908	0167742036	0167754710 0167742240	0167769038	0167743072	0167761806
Isochrysis galbana CCMP1323	0183622082	0179744296	0183612136 0183620842	0183634390	0183618188 0183614696	0179769272	0183624774	0179767666
Prymnesium parvum Texoma1	0113243116	0113253550	0113244710	0182828938	0113246064 0182816676	0113237102 0113266472	0182847858	0182803260
Chrysochromulina polylepis CCMP1757			0183199030
Chrysochromulina polylepis UIO037				0115793358	0115793924 0115787264	0115802984
Chrysochromulina rotalis UIO044								0115885342
Chrysochromulina sp. CCMP291		AHY04367
Pavlova lutheri		YP_007476320
Pavlova sp. CCMP459	0185548234		0185159888	0185212782	0185191794 0185186924	0185176536 0185187408		0185166110
Gephyrocapsa oceanica RCC1303	0185283286		0185467618	0185371994	0185305440 0185347762	0185348136	0185538728	0185309328
Emiliania huxleyi	EMIHUDRAFT_420555	YP_277379	EMIHUDRAFT_317426	EMIHUDRAFT_427895	EMIHUDRAFT_63485	XP_005768361		EMIHUDRAFT_421924
Coccolithus pelagicus ssp braarudi PLY182g	0183382004		0183351040	0183346584	0183352306 0183339980 0183339666	0183337496 0183351816		0183356242
Cryptomonas curvata CCAP979/52	0172165048		0172173274 0172208546			0172180120		0172212116
Guillardia theta CCMP2712					XP_005836929	XP_005823840
Guillardia theta	GUITHDRAFT_160283	NP_050702	GUITHDRAFT_164999	GUITHDRAFT_166420				GUITHDRAFT_160205
Rhodomonas lens RHODO					0177715968 0177708626			0177703580
Rhodomonas salina CCMP1319	0172104762		0172135974	0172111206	0172101514
Rhodomonas salina		YP_001293514
Hemiselmis andersenii CCMP644					0114132128 0114124776	0114126748
Hemiselmis andersenii CCMP1180	0169445502			0169455236	0169448160 0169441310
Teleaulax amphioxeia		YP_009159192
Vitrella brassicaformis (Alveolata sp. CCMP3155)	0184577076	0184601682	CEL94421	0184574122	0184578202	0184583002		0184563618
Chromera velia CCMP2878	0184619958	0184618960		0184617324	0184620032 0184616194	0184620172		0184625812
Gymnodinium catenatum GC744	0117577356	0117571600 0117466904	0117588018	0117514616	0117608140 0117575528 0117461206	0117507940	0117502444	0117505930
Heterocapsa rotundata SCCAP K-0483	0168641950	0168640798	0168677472 0168664370	0168632448	0168679572 0168648146 0168641362	0168666400		0168645932
Amphidinium carterae CCMP1314	0176643670	0176636204 0176631084	0176610910 0176597938	0176612798	0176614010	0176651760	0176594058	0176627120
Symbiodinium sp. CCMP421	0181446846	0181541294 0181441562	0181484946 0181429524	0181449712	0181501640 0181437524 0181435056 0181428654 0181428018 0181427652 0181424626 0181422850	0181487518		0181409042
Symbiodinium sp. Mp								0169663294
Polarella glacialis CCMP 1383	0115160188	0115116290 0115067060	0115124040	0115081284	0115153010	0115071560
Protoceratium reticulatum CCCM 535 (=CCMP 1889)	0168385390	0168363578	0168360422	0168398568	0168501030 0168391606 0168370556	0168361396		0168414346
Lingulodinium polyedrum CCMP 1738	0118537814	0118447584 0118424904	0118240498 0118083486		0118444332 0118280466 0118077914 0117998516	0118091954	0117926066	0117943868
Togula jolla CCCM 725		0170603912 0170599908	0170589012	0170595490	0170605586	0170642014	0170585718	0170614824
Alexandrium monilatum CCMP3105	0175499038	0175500646 0175609804	0175648728	0175368248	0175687342 0175655172 0175500090 0175401814 0175282320 0175247010	0175513566
Alexandrium tamarense CCMP1771								0116221304
Ceratium fusus PA161109		0172835328 0172747038	0172774544 0172779176			0172769034		0172817798
Kryptoperidinium foliaceum CCMP 1326	0176219456		0176017882 0176047496	0176183748	0176206634 0176067726 0176045900	0176049830
Kryptoperidinium foliaceum		ADI40329
Durinskia baltica CSIRO CS-38	0170209560 0170325366	0170307404	0170425144	0170245848	0170359578 0170207634	0170384552
Durinskia baltica		YP_003734982
Karenia brevis Wilson								0114784834
Karenia brevis CCMP2229	0173861370	0173787962	0173791114 0173923170	0173758408	0174002120 0173999550	0174088982	0173927754
Karlodinium micrum CCMP2283	0169258024		0169181396 0169359022	0169310134	0169198464 0169102736 0169076352	0169202308		0169097534
Karlodinium veneficum		AEJ72982
Lepidodinium chlorophorum NIES-1868	comp120718_c0_seq1	comp92531_c0_seq1	comp96340_c0_seq1	comp85011_c0_seq1	comp104830_c0_seq1 comp29332_c0_seq1	comp25143_c0_seq1	comp137209_c0_seq1	comp104395_c0_seq1 comp198554_c0_seq1
Synechocystis sp. PCC 6803	slr1777	slr1030	slr1055	slr0525	slr0506		BAM54694	slr0056
Synechococcus sp. WH5701							WP_006170842
Synechococcus sp. WH8102	SYNW0213			SYNW2287		NC_005070
Synechococcus sp. PCC7002			SYNPCC7002_A1000 SYNPCC7002_A1018
Synechococcus sp. WH7805							WP_006041718
Synechococcus elongatus PCC6301		syc0940_c	syc1955_c				WP_011242509	syc2009_d
Thermosynechococcus elongatus	tll1413
Thermosynechococcus elongatus BP1							WP_011057682
Microcystis aeruginosa	MAE_45780	MAE_48880		MAE_55430	MAE_13650			MAE_22020
Acaryochloris marina	AM1_0533	AM1_4907	AM1_5564 AM1_4852	AM1_3674	AM1_1191			AM1_1019
Trichodesmium erythraeum	Tery_4967	Tery_3622		Tery_4469	Tery_0109			Tery_0876
Nostoc sp. PCC 7120	all0278				all1743
Nostoc sp. PCC 7107		Nos7107_0687	Nos7107_0382 Nos7107_3837
Anabaena variabilis				Ava_3899	Ava_0294		ABA23813	Ava_3341
Prochlorococcus marinus SS120	Pro_0319	Pro_1146		Pro_0193	Pro_0543			Pro_0424
Oscillatoria acuminata			Oscil6304_1371 Oscil6304_3671
Microcoleus sp. PCC 7113			Mic7113_1943 Mic7113_3542
Gloeobacter violaceus PCC7421							WP_011140880	glr1809
Dinoroseobacter shibae					Dshi_4160
